# Supplementary material for: Drosophila HCN mediates gustatory homeostasis by preserving sensillar transepithelial potential in sweet environments
Source: eLife. 2024 Jul 29;13:RP96602. doi: 10.7554/eLife.96602 (PMC11286260; doi:10.7554/eLife.96602)
Supplement: Figure 1—figure supplement 1—source data 1. [file elife-96602-fig1-figsupp1-data1.xlsx]

## Sheet: panel A-D
Figure 1-supplement 1
Figure 1-supplement 1 A					Figure 1-supplement 1 A
i-a type bristle					i-a type bristle
Spiking frequency (Hz)					Spiking frequency (Hz)
First 5s					First 5s
BER 0.5 mM	WT	Ihf03355	Ihf03355;{Ih}/+		LOB 1 mM	WT	Ihf03355	Ihf03355;{Ih}/+
	9.6	4.4	7.8			3.4	0.6	29.2
	7.8	5.4	10.8			7.6	0.6	22.2
	6.8	4	6.8			6.2	0.4	10.2
	9.8	4.4	5.2			7	0.2	18.6
	8	4.6	7.8			7.6	1	20.4
	7.4	2.6	7.2			6	0	13.6
	8.8	4	11			6	1.4
	8.4					6.2	3.2
	9.6					10	0.8
	10.6
Figure 1-supplement 1 C					Figure 1-supplement 1 D
i-b type brislte					i-b type brislte
Spiking frequency (Hz)					Spiking frequency (Hz)
First 5s					First 5s
TPH 1 mM	WT	Ihf03355	Ihf03355;{Ih}/+		UMB 0.1 mM	WT	Ihf03355	Ihf03355;{Ih}/+
	12	7.6	9.6			9.6	5.2	13.4
	13.8	2.4	10.8			10.8	5.6	9.6
	9.8	9.8	9.6			17.8	5.6	7.2
	7.4	6	11.6			11	5.2	7
	9.8	3	11.8			12.6	1	8.8
	9.4	2.4	9.2			11.8	3.2	10.8
	9.4	8.8	10			8.2	1
	10.6	7.6	17.4			12	8.8
	11.6	5.2				9.8	3.8
		4.8				9.6
