# Supplementary material for: Drosophila HCN mediates gustatory homeostasis by preserving sensillar transepithelial potential in sweet environments
Source: eLife. 2024 Jul 29;13:RP96602. doi: 10.7554/eLife.96602 (PMC11286260; doi:10.7554/eLife.96602)
Supplement: Figure 1—figure supplement 2—source data 1. [file elife-96602-fig1-figsupp2-data1.xlsx]

## Sheet: panel B
Figure 1-supplement 2
Figure 1-supplement B
Spiking frequency (Hz)
First 5s
Gr5a>Ih RNAi (tub-Gal80ts/+)
18 °C
Caffeine 2 mM	Sucrose 50 mM
18	17.6
16	13.6
34	26.8
12.8	35.6
11.6	27.2
16.4	26
13.8	21
24.2	17.4
20.4	35.2
Figure 1-supplement B
Spiking frequency (Hz)
First 5s
Gr5a>Ih RNAi (tub-Gal80ts/+)
29 °C
Caffeine 2 mM	Sucrose 50 mM
7.2	33.8
10.2	35.4
9	33.6
8.4	41
8.8	37.4
9	54.4
13.4	34.8
7.4
5.2
11.6
10.8
10.8
