# Supplementary material for: Drosophila HCN mediates gustatory homeostasis by preserving sensillar transepithelial potential in sweet environments
Source: eLife. 2024 Jul 29;13:RP96602. doi: 10.7554/eLife.96602 (PMC11286260; doi:10.7554/eLife.96602)
Supplement: Figure 1—source data 1. [file elife-96602-fig1-data1.xlsx]

## Sheet: panel A and B
	Figure 1
	Figure 1A				Figure 1B
	Spiking frequency (Hz)				Spiking frequency (Hz)
	First 5s				First 5s
	WT: Caffeine 2 mM				WT: Sucrose 50 mM
	12.2				21.8
	17.2				23
	17.8				31
	10				31.8
	12.6				27.4
	15				28.2
	13.4				22.6
	13.2
	16
	25.2
	18
	15.4
	Figure 1A				Figure 1B
	Spiking frequency (Hz)				Spiking frequency (Hz)
	First 5s				First 5s
	Ihf03355 : Caffeine 2 mM				Ihf03355 : Sucrose 50 mM
	10.2				29.2
	7.8				26.2
	8.4				23.6
	12.6				27.4
	8.4				22
	10.6				25.2
	9
	9.8
	Figure 1A				Figure 1B
	Spiking frequency (Hz)				Spiking frequency (Hz)
	First 5s				First 5s
	Ih-TG4.0/+ : Caffeine 2 mM				Ih-TG4.0/+ : Sucrose 50 mM
	5.6				47.4
	6.6				36.6
	14.2				23.6
	7.8				31.2
	9.4				24.2
	10				42
	8				22
	7.8				22.8
					39.2
					24
	Figure 1A				Figure 1B
	Spiking frequency (Hz)				Spiking frequency (Hz)
	First 5s				First 5s
	Ihf03355;{Ih}/+: Caffeine 2 mM				Ihf03355;{Ih}/+: Sucrose 50 mM
	19.8				37.2
	18.2				25.6
	17.2				16.4
	12.8				25.7
	22.4				19.4
	22.4				30
	12.8				15.2
	14.4				29.2
	21				29.4
					27.4

## Sheet: panel C and D
	Figure 1
	Figure 1C		Figure 1D
	Spiking frequency (Hz)		Spiking frequency (Hz)
	First 5s		First 5s
	Gr64f>Ih RNAi: Caffeine 2 mM		Gr64f>Ih RNAi: Sucrose 50 mM
	15		33
	13		57
	11.4		23.6
	14.6		57
	15		46
	15.2		39.9
	13.2		54
	14.2		37.4
	13.2
	10.6
	Figure 1C		Figure 1D
	Spiking frequency (Hz)		Spiking frequency (Hz)
	First 5s		First 5s
	Gr89a>Ih RNAi: Caffeine 2 mM		Gr89a>Ih RNAi: Sucrose 50 mM
	12.6		22.8
	17		27
	20.4		27.6
	24		32.2
	24		33.6
	16.2		35.4
	24		37.6
	20.2
	17.4
	24
	Figure 1C		Figure 1D
	Spiking frequency (Hz)		Spiking frequency (Hz)
	First 5s		First 5s
	Gr64f-Gal4/+: Caffeine 2 mM		Gr64f-Gal4/+: Sucrose 50 mM
	16		19.6
	23.2		19.6
	19.2		20
	17		22.9
	18.2		25.2
	16.2		25.8
	23.2		26.2
	18.2		27.6
	18.2		29.8
	23.2		30.8
			36.2
	Figure 1C		Figure 1D
	Spiking frequency (Hz)		Spiking frequency (Hz)
	First 5s		First 5s
	UAS-Ih RNAi/+: Caffeine 2 mM		UAS-Ih RNAi/+: Sucrose 50 mM
	23.2		30.2
	28.8		17.4
	17.4		31.8
	14.2		20.4
	15		26.6
	26.2		25.4
	28.6		21.8
	19.4		34.4
	24.8		25.6
	16.8		15.8

## Sheet: panel E and F
Figure 1
Ihf03355 background
Figure 1E			Figure 1F
Spiking frequency (Hz)			Spiking frequency (Hz)
First 5s			First 5s
Gr64f>Ih-RF: Caffeine 2 mM			Gr64f>Ih-RF: Sucrose 50 mM
14.4			37
21.2			19.4
18.2			28
16.4			26.8
14.8			25.6
17.4			44
14.6			31.2
18.2			23.6
31.4			23.6
17.4			28.6
Figure 1E			Figure 1F
Spiking frequency (Hz)			Spiking frequency (Hz)
First 5s			First 5s
Gr89a>Ih-RF: Caffeine 2 mM			Gr89a>Ih-RF: Sucrose 50 mM
10.2			45.6
10.8			28.8
8.2			46
9.6			38.8
12.2			30.2
14.6			30.8
6.6			29.2
9.6			55
10.2			56.2
			32.6
Figure 1E			Figure 1F
Spiking frequency (Hz)			Spiking frequency (Hz)
First 5s			First 5s
Gr64f-Gal4/+: Caffeine 2 mM			Gr64f-Gal4/+: Sucrose 50 mM
9.4			32.8
7.4			37.4
9.6			24.8
10.4			38.3
10.4			27
5			20.6
15.2			21.2
7.8			45.6
7.4			38.8
10.2			39
Figure 1E			Figure 1F
Spiking frequency (Hz)			Spiking frequency (Hz)
First 5s			First 5s
Gr89a-Gal4/+: Caffeine 2 mM			Gr89a-Gal4/+: Sucrose 50 mM
4.4			28
6.8			21.8
7.2			35.2
11.6			27.6
8.4			15
12.3			22
8.4			19.6
Figure 1E			Figure 1F
Spiking frequency (Hz)			Spiking frequency (Hz)
First 5s			First 5s
UAS-Ih-RF/+: Caffeine 2 mM			UAS-Ih-RF/+: Sucrose 50 mM
10.2			29.4
7.6			29.4
10.2			28.4
6.2			25
11			23.2
7.6			22.4
10.6			24.4
7.2
12
