# Supplementary material for: Drosophila HCN mediates gustatory homeostasis by preserving sensillar transepithelial potential in sweet environments
Source: eLife. 2024 Jul 29;13:RP96602. doi: 10.7554/eLife.96602 (PMC11286260; doi:10.7554/eLife.96602)
Supplement: Figure 2—source data 1. [file elife-96602-fig2-data1.xlsx]

## Sheet: panel A
Figure 2
Figure 2A
WT
Potential (mV)
Time (sec)	Raw	DC bias	Raw-DC bias
0	-440.35	-440.534	-608.25
0.1	-440.981	-441.147	-608.881
0.2	-440.969	-441.156	-608.869
0.3	-440.969	-441.137	-608.869
0.4	-440.969	-441.122	-608.869
0.5	-440.969	-441.125	-608.869
0.6	-440.975	-441.109	-608.875
0.7	-440.969	-441.106	-608.869
0.8	-440.969	-441.097	-608.869
0.9	-440.969	-441.094	-608.869
1	-440.969	-441.094	-608.869
1.1	-440.972	-441.088	-608.872
1.2	-216.512	-441.081	-384.413
1.3	-178.631	-441.153	-346.531
1.4	-143.034	-439.506	-310.934
1.5	-108.669	-280.616	-276.569
1.6	-73.0531	-95.7687	-240.953
1.7	-42.6375	154.956	-210.537
1.8	-14.05	160.722	-181.95
1.9	9.93438	160.947	-157.966
2	30.5031	163.087	-137.397
2.1	49.0656	166.519	-118.834
2.2	65.2531	170.359	-102.647
2.3	80.1906	173.8	-87.7094
2.4	92.825	175.606	-75.075
2.5	103.869	175.184	-64.0312
2.6	114.053	174.7	-53.8469
2.7	122.509	183.959	-45.3906
2.8	130.694	172.916	-37.2063
2.9	138.184	167.706	-29.7156
3	144.053	167.037	-23.8469
3.1	149.416	167.175	-18.4844
3.2	154.306	167.166	-13.5938
3.3	158.894	167.2	-9.00625
3.4	162.369	166.456	-5.53127
3.5	166.037	167.281	-1.86251
3.6	168.972	168.603	1.07188
3.7	171.772	168.787	3.87188
3.8	174.428	169.159	6.52814
3.9	176.513	169.587	8.61251
4	178.359	169.669	10.4594
4.1	179.825	169.731	11.925
4.2	181.919	168.156	14.0187
4.3	183.4	167.925	15.5
4.4	184.709	168.022	16.8094
4.5	185.881	166.781	17.9812
4.6	186.553	167.994	18.6531
4.7	188	168.428	20.1
4.8	188.953	168.863	21.0531
4.9	189.772	168.925	21.8719
5	190.578	168.119	22.6781
5.1	191.313	168.503	23.4125
5.2	192.05	168.544	24.15
5.3	192.481	168.447	24.5813
5.4	193.094	168.213	25.1938
5.5	193.581	168.181	25.6813
5.6	194.113	168.094	26.2125
5.7	194.469	167.878	26.5688
5.8	194.884	167.737	26.9844
5.9	195.238	167.737	27.3375
6	195.628	167.819	27.7281
6.1	196.022	167.909	28.1219
6.2	196.35	167.934	28.45
6.3	196.8	167.772	28.9
6.4	197.103	167.772	29.2032
6.5	197.303	167.753	29.4031
6.6	197.741	167.606	29.8406
6.7	197.806	167.541	29.9063
6.8	197.763	167.531	29.8625
6.9	199.125	167.541	31.225
7	198.153	167.494	30.2531
7.1	198.241	167.487	30.3406
7.2	198.575	167.337	30.675
7.3	198.778	167.122	30.8781
7.4	198.756	167.094	30.8562
7.5	198.663	167.009	30.7625
7.6	198.847	167.053	30.9469
7.7	199.137	167.1	31.2375
7.8	199.147	167.113	31.2469
7.9	199.334	167.169	31.4344
8	199.512	167.209	31.6125
8.1	199.662	167.231	31.7625
8.2	199.716	167.228	31.8156
8.3	199.856	167.159	31.9563
8.4	200.019	167.069	32.1188
8.5	200.216	166.984	32.3156
8.6	200.297	166.894	32.3969
8.7	200.256	166.837	32.3562
8.8	200.406	166.784	32.5062
8.9	200.375	166.728	32.475
9	200.603	166.666	32.7031
9.1	200.822	166.647	32.9219
9.2	200.881	166.6	32.9812
9.3	201.009	166.575	33.1093
9.4	201.116	166.447	33.2156
9.5	201.222	166.466	33.3219
9.6	201.281	166.619	33.3813
9.7	201.484	166.772	33.5844
9.8	201.538	166.753	33.6375
9.9	201.688	166.753	33.7875
10	201.787	166.787	33.8875
10.1	201.694	166.897	33.7938
10.2	201.875	166.919	33.975
10.3	202.072	166.9	34.1719
10.4	202.178	166.847	34.2781
10.5	202.231	166.8	34.3312
10.6	202.228	166.75	34.3281
10.7	202.322	166.669	34.4219
10.8	202.531	166.603	34.6313
10.9	202.603	166.65	34.7031
11	202.591	166.6	34.6906
11.1	202.519	166.556	34.6188
11.2	202.744	166.5	34.8437
11.3	202.891	166.422	34.9907
11.4	202.953	166.366	35.0531
11.5	202.991	166.459	35.0906
11.6	202.925	166.441	35.025
11.7	202.994	166.481	35.0938
11.8	203.022	166.516	35.1219
11.9	203.216	166.5	35.3156
12	203.409	166.391	35.5094
12.1	203.447	166.331	35.5469
12.2	203.591	166.234	35.6906
12.3	203.563	166.219	35.6625
12.4	203.553	166.191	35.6531
12.5	203.522	166.169	35.6219
12.6	203.534	166.241	35.6344
12.7	203.631	166.322	35.7313
12.8	203.709	166.378	35.8094
12.9	203.813	166.353	35.9125
13	203.791	166.288	35.8906
13.1	203.859	166.259	35.9594
13.2	203.878	166.247	35.9781
13.3	203.869	166.231	35.9688
13.4	203.828	166.203	35.9281
13.5	204.044	166.2	36.1438
13.6	204.253	166.191	36.3531
13.7	204.216	166.297	36.3156
13.8	204.194	166.403	36.2938
13.9	204.281	166.366	36.3813
14	204.416	166.266	36.5157
14.1	204.322	166.209	36.4219
14.2	204.322	166.253	36.4219
14.3	204.388	166.203	36.4875
14.4	204.45	166.109	36.55
14.5	204.544	166.125	36.6437
14.6	204.472	166.134	36.5719
14.7	204.428	166.075	36.5281
14.8	204.472	165.953	36.5719
14.9	204.497	165.828	36.5969
15	204.512	165.806	36.6125
15.1	204.512	165.841	36.6125
15.2	204.541	165.862	36.6406
15.3	204.597	165.838	36.6969
15.4	204.575	165.744	36.675
15.5	204.509	165.703	36.6094
15.6	204.556	165.697	36.6562
15.7	204.612	165.753	36.7125
15.8	204.547	165.991	36.6469
15.9	204.622	166.309	36.7219
16	204.697	166.381	36.7968
16.1	204.716	166.378	36.8156
16.2	204.825	166.403	36.925
16.3	204.747	166.456	36.8469
16.4	204.869	166.616	36.9688
16.5	204.947	167.031	37.0469
16.6	204.878	167.328	36.9781
16.7	204.872	167.469	36.9719
16.8	204.791	167.494	36.8906
16.9	204.8	167.572	36.9
17	204.791	167.622	36.8906
17.1	204.681	167.675	36.7812
17.2	204.719	167.656	36.8188
17.3	204.716	167.697	36.8156
17.4	204.828	167.719	36.9282
17.5	204.819	167.766	36.9188
17.6	204.919	167.781	37.0187
17.7	204.925	167.866	37.025
17.8	205.012	167.953	37.1125
17.9	204.938	167.962	37.0375
18	204.797	167.981	36.8969
18.1	204.669	167.994	36.7687
18.2	204.772	168.072	36.8719
18.3	204.834	168.169	36.9344
18.4	204.831	168.2	36.9313
18.5	204.903	168.228	37.0031
18.6	204.969	168.269	37.0687
18.7	204.938	168.281	37.0375
18.8	204.788	168.241	36.8875
18.9	204.766	168.238	36.8656
19	204.525	168.253	36.625
19.1	204.241	168.238	36.3406
19.2	204.653	168.206	36.7531
19.3	204.581	168.228	36.6812
19.4	204.625	168.256	36.725
19.5	204.55	168.244	36.65
19.6	204.484	168.238	36.5844
19.7	204.525	168.209	36.625
19.8	204.594	168.166	36.6937
19.9	204.394	168.144	36.4938
20	204.519	168.153	36.6187
20.1	204.516	168.184	36.6156
20.2	204.325	168.153	36.425
20.3	204.316	168.163	36.4156
20.4	204.5	168.2	36.6
20.5	204.466	168.184	36.5656
20.6	204.406	168.147	36.5063
20.7	204.344	168.222	36.4438
20.8	204.372	168.206	36.4719
20.9	204.378	168.219	36.4781
21	204.338	168.25	36.4375
21.1	204.425	168.262	36.525
21.2	204.331	168.244	36.4313
21.3	204.259	168.241	36.3594
21.4	204.294	168.194	36.3938
21.5	204.306	168.184	36.4063
21.6	204.363	168.178	36.4625
21.7	204.313	168.172	36.4125
21.8	204.303	168.181	36.4031
21.9	204.363	168.188	36.4625
22	204.381	168.159	36.4813
22.1	204.484	168.144	36.5844
22.2	204.553	168.144	36.6531
22.3	204.394	168.122	36.4938
22.4	204.406	168.1	36.5063
22.5	204.413	168.103	36.5125
22.6	204.587	168.122	36.6875
22.7	204.528	168.128	36.6281
22.8	204.581	168.106	36.6812
22.9	204.8	168.081	36.9
23	204.756	168.022	36.8563
23.1	204.706	167.959	36.8062
23.2	204.731	167.981	36.8313
23.3	204.634	168.022	36.7343
23.4	204.594	168.031	36.6937
23.5	204.703	168.016	36.8031
23.6	204.647	168.081	36.7469
23.7	204.622	168.159	36.7219
23.8	204.544	168.125	36.6437
23.9	204.669	168.097	36.7687
24	204.659	168.097	36.7594
24.1	204.597	168.153	36.6968
24.2	204.628	168.097	36.7281
24.3	204.656	168.112	36.7562
24.4	204.578	168.112	36.6781
24.5	204.628	168.122	36.7281
24.6	204.675	168.109	36.775
24.7	204.697	168.131	36.7969
24.8	204.678	168.144	36.7781
24.9	204.619	168.131	36.7187
25	204.591	168.134	36.6906
25.1	204.591	168.131	36.6906
25.2	204.634	168.106	36.7344
25.3	204.666	168.144	36.7656
25.4	204.528	168.2	36.6281
25.5	204.522	168.175	36.6219
25.6	204.522	168.141	36.6219
25.7	204.556	168.103	36.6562
25.8	204.463	168.066	36.5625
25.9	204.534	168.041	36.6343
26	204.463	167.991	36.5625
26.1	204.397	168.078	36.4969
26.2	204.388	168.113	36.4875
26.3	204.356	168.141	36.4563
26.4	204.441	168.156	36.5406
26.5	204.447	168.087	36.5469
26.6	204.413	168.131	36.5125
26.7	204.272	168.153	36.3719
26.8	204.072	168.134	36.1719
26.9	204.356	168.209	36.4563
27	204.263	168.191	36.3625
27.1	204.263	168.175	36.3625
27.2	204.219	168.156	36.3188
27.3	204.25	168.163	36.35
27.4	204.322	168.097	36.4219
27.5	204.209	168.116	36.3094
27.6	204.228	168.134	36.3281
27.7	204.222	168.109	36.3219
27.8	204.234	168.175	36.3344
27.9	204.159	168.216	36.2594
28	204.213	168.15	36.3125
28.1	204.144	168.141	36.2437
28.2	204.078	168.131	36.1781
28.3	204.041	168.141	36.1406
28.4	204.169	168.194	36.2688
28.5	204.206	168.234	36.3062
28.6	204.087	168.213	36.1875
28.7	204.1	168.228	36.2
28.8	204.078	168.219	36.1781
28.9	203.997	168.216	36.0969
29	203.994	168.225	36.0938
29.1	203.934	168.175	36.0344
29.2	203.988	168.191	36.0875
29.3	203.966	168.206	36.0656
29.4	203.931	168.213	36.0313
29.5	203.975	168.197	36.075
29.6	204	168.213	36.1
29.7	204.091	168.238	36.1906
29.8	204.078	168.241	36.1781
29.9	204.044	168.238	36.1437
30	204.006	168.247	36.1063
30.1	204.003	168.247	36.1031
30.2	203.966	168.219	36.0656
30.3	203.953	168.266	36.0531
30.4	203.931	168.209	36.0312
30.5	203.95	168.206	36.05
30.6	203.931	168.231	36.0313
30.7	203.875	168.216	35.975
30.8	203.828	168.178	35.9282
30.9	203.863	168.181	35.9625
31	203.8	168.213	35.9
31.1	203.813	168.238	35.9125
31.2	203.738	168.213	35.8375
31.3	203.597	168.172	35.6969
31.4	203.581	168.144	35.6812
31.5	203.5	168.138	35.6
31.6	203.65	168.153	35.75
31.7	203.534	168.197	35.6344
31.8	203.637	168.206	35.7375
31.9	203.631	168.206	35.7313
32	203.709	168.206	35.8094
32.1	203.716	168.228	35.8156
32.2	203.672	168.247	35.7719
32.3	203.553	168.263	35.6531
32.4	203.494	168.253	35.5938
32.5	203.438	168.291	35.5375
32.6	203.375	168.325	35.475
32.7	203.516	168.291	35.6157
32.8	203.594	168.309	35.6938
32.9	203.638	168.284	35.7375
33	203.666	168.303	35.7656
33.1	203.613	168.253	35.7125
33.2	203.628	168.278	35.7281
33.3	203.675	168.331	35.775
33.4	203.594	168.356	35.6938
33.5	203.669	168.272	35.7687
33.6	203.603	168.309	35.7031
33.7	203.644	168.362	35.7437
33.8	203.591	168.303	35.6906
33.9	203.622	168.338	35.7219
34	203.591	168.322	35.6906
34.1	203.609	168.362	35.7094
34.2	203.613	168.378	35.7125
34.3	203.575	168.316	35.675
34.4	203.541	168.403	35.6406
34.5	203.641	168.434	35.7406
34.6	203.522	168.419	35.6219
34.7	203.334	168.428	35.4344
34.8	203.625	168.359	35.725
34.9	203.559	168.381	35.6594
35	203.469	168.387	35.5688
35.1	203.378	168.4	35.4781
35.2	203.394	168.375	35.4938
35.3	203.244	168.428	35.3438
35.4	203.225	168.359	35.325
35.5	203.153	168.384	35.2531
35.6	203.175	168.381	35.275
35.7	203.103	168.353	35.2031
35.8	203.219	168.422	35.3188
35.9	203.334	168.4	35.4344
36	203.288	168.356	35.3875
36.1	203.175	168.341	35.275
36.2	203.194	168.356	35.2938
36.3	203.256	168.387	35.3563
36.4	203.172	168.353	35.2719
36.5	203.097	168.356	35.1969
36.6	203.091	168.384	35.1906
36.7	203.15	168.406	35.25
36.8	203.272	168.381	35.3719
36.9	203.25	168.378	35.35
37	203.156	168.412	35.2563
37.1	203.141	168.403	35.2406
37.2	203.163	168.384	35.2625
37.3	203.134	168.356	35.2344
37.4	203.116	168.406	35.2156
37.5	203.106	168.403	35.2063
37.6	203.313	168.366	35.4125
37.7	203.384	168.412	35.4844
37.8	203.338	168.381	35.4375
37.9	203.387	168.341	35.4875
38	203.275	168.356	35.375
38.1	203.128	168.35	35.2281
38.2	202.956	168.338	35.0563
38.3	202.913	168.363	35.0125
38.4	202.903	168.331	35.0031
38.5	202.903	168.356	35.0031
38.6	202.772	168.328	34.8719
38.7	202.756	168.359	34.8563
38.8	202.787	168.363	34.8875
38.9	202.631	168.369	34.7313
39	202.688	168.375	34.7875
39.1	202.709	168.366	34.8094
39.2	202.731	168.3	34.8313
39.3	202.822	168.353	34.9219
39.4	202.781	168.347	34.8813
39.5	202.675	168.312	34.775
39.6	202.722	168.35	34.8219
39.7	202.575	168.35	34.675
39.8	202.516	168.328	34.6156
39.9	202.534	168.356	34.6344
40	202.678	168.347	34.7781
40.1	202.738	168.347	34.8375
40.2	202.625	168.334	34.725
40.3	202.656	168.309	34.7563
40.4	202.703	168.325	34.8031
40.5	202.616	168.303	34.7156
40.6	202.644	168.284	34.7437
40.7	202.562	168.291	34.6625
40.8	202.613	168.325	34.7125
40.9	202.609	168.325	34.7094
41	202.575	168.3	34.675
41.1	202.572	168.253	34.6719
41.2	202.537	168.253	34.6375
41.3	202.491	168.272	34.5906
41.4	202.556	168.244	34.6562
41.5	202.544	168.309	34.6438
41.6	202.484	168.272	34.5844
41.7	202.441	168.263	34.5406
41.8	202.316	168.281	34.4156
41.9	202.441	168.284	34.5406
42	202.4	168.272	34.5
42.1	202.416	168.306	34.5156
42.2	202.481	168.303	34.5812
42.3	202.6	168.338	34.7
42.4	202.594	168.356	34.6937
42.5	202.537	168.338	34.6375
42.6	202.509	168.319	34.6094
42.7	202.416	168.306	34.5156
42.8	202.487	168.281	34.5875
42.9	202.553	168.253	34.6531
43	202.584	168.253	34.6844
43.1	202.547	168.281	34.6469
43.2	202.453	168.228	34.5531
43.3	202.531	168.222	34.6312
43.4	202.453	168.262	34.5531
43.5	202.472	168.216	34.5719
43.6	202.387	168.266	34.4875
43.7	202.328	168.278	34.4281
43.8	202.353	168.234	34.4531
43.9	202.269	168.244	34.3687
44	202.222	168.266	34.3219
44.1	202.116	168.225	34.2156
44.2	202.181	168.256	34.2812
44.3	202.153	168.213	34.2531
44.4	202.019	168.228	34.1187
44.5	201.997	168.256	34.0969
44.6	201.997	168.203	34.0969
44.7	202.137	168.237	34.2375
44.8	202.113	168.219	34.2125
44.9	202.134	168.213	34.2344
45	202	168.166	34.1
45.1	202.116	168.225	34.2156
45.2	201.944	168.225	34.0438
45.3	201.837	168.216	33.9375
45.4	201.994	168.191	34.0937
45.5	202.034	168.238	34.1344
45.6	202.037	168.231	34.1375
45.7	202.094	168.222	34.1937
45.8	202.059	168.228	34.1594
45.9	202.037	168.219	34.1375
46	201.991	168.228	34.0906
46.1	201.944	168.281	34.0437
46.2	202.003	168.272	34.1031
46.3	201.981	168.262	34.0812
46.4	201.962	168.281	34.0625
46.5	201.828	168.266	33.9281
46.6	201.781	168.269	33.8813
46.7	201.812	168.238	33.9125
46.8	201.812	168.228	33.9125
46.9	201.697	168.25	33.7969
47	201.691	168.2	33.7906
47.1	201.737	168.272	33.8375
47.2	201.847	168.219	33.9469
47.3	201.809	168.259	33.9094
47.4	201.734	168.225	33.8344
47.5	201.744	168.269	33.8437
47.6	201.709	168.197	33.8094
47.7	201.65	168.238	33.75
47.8	201.556	168.197	33.6562
47.9	201.666	168.175	33.7656
48	201.613	168.188	33.7125
48.1	201.578	168.125	33.6781
48.2	201.434	168.163	33.5344
48.3	201.494	168.144	33.5937
48.4	201.456	168.147	33.5562
48.5	201.453	168.15	33.5531
48.6	201.559	168.153	33.6594
48.7	201.575	168.128	33.675
48.8	201.613	168.128	33.7125
48.9	201.487	168.144	33.5875
49	201.313	168.144	33.4125
49.1	201.434	168.147	33.5344
49.2	201.4	168.134	33.5
49.3	201.434	168.103	33.5343
49.4	201.375	168.087	33.475
49.5	201.437	168.1	33.5375
49.6	201.441	168.087	33.5406
49.7	201.487	168.072	33.5875
49.8	201.469	168.059	33.5687
49.9	201.372	168.044	33.4719
50	201.419	168.041	33.5187
50.1	201.447	168.016	33.5469
50.2	201.344	168.016	33.4437
50.3	201.425	168.025	33.525
50.4	201.397	168.003	33.4969
50.5	201.387	168.013	33.4875
50.6	201.475	168.013	33.575
50.7	201.45	168.013	33.55
50.8	201.441	168	33.5406
50.9	201.378	167.994	33.4781
51	201.303	167.991	33.4031
51.1	201.391	168.009	33.4906
51.2	201.509	168	33.6093
51.3	201.466	167.997	33.5656
51.4	201.444	168	33.5437
51.5	201.437	168.016	33.5375
51.6	201.338	168.003	33.4375
51.7	201.325	167.981	33.425
51.8	201.309	168.041	33.4094
51.9	201.238	167.991	33.3375
52	201.175	168.047	33.275
52.1	200.806	168.028	32.9062
52.2	200.978	168.022	33.0781
52.3	201.05	168.037	33.15
52.4	201.012	168.025	33.1125
52.5	200.962	168.047	33.0625
52.6	201.094	168.009	33.1937
52.7	201.041	168.003	33.1406
52.8	201.012	168.003	33.1125
52.9	200.844	167.981	32.9437
53	201.106	167.962	33.2062
53.1	201.125	167.959	33.225
53.2	201.172	167.972	33.2719
53.3	201.184	167.988	33.2844
53.4	201.15	167.975	33.25
53.5	201.075	167.969	33.175
53.6	201.103	167.956	33.2031
53.7	201.169	167.956	33.2687
53.8	201.188	167.959	33.2875
53.9	200.984	167.962	33.0844
54	200.991	167.934	33.0906
54.1	200.994	167.928	33.0937
54.2	201.119	167.975	33.2188
54.3	201.134	168.013	33.2344
54.4	201.153	168.034	33.2531
54.5	201.181	168.031	33.2812
54.6	201.037	168.031	33.1375
54.7	201.134	168.019	33.2344
54.8	201.106	168.003	33.2062
54.9	200.991	168.019	33.0906
55	201.062	168.013	33.1625
55.1	201.122	168	33.2219
55.2	201.084	167.969	33.1844
55.3	201.1	168.034	33.2
55.4	201.109	168.056	33.2094
55.5	201.081	168.016	33.1812
55.6	201.031	168.016	33.1312
55.7	200.975	168.019	33.075
55.8	201.128	168.037	33.2281
55.9	201.234	168	33.3344
56	201.163	168.016	33.2625
56.1	201.059	168.041	33.1594
56.2	201.072	168.028	33.1719
56.3	201.175	168.028	33.275
56.4	201.059	167.997	33.1594
56.5	201.062	167.997	33.1625
56.6	201.2	168.006	33.3
56.7	201.219	168.006	33.3188
56.8	201.181	167.991	33.2813
56.9	201.181	167.975	33.2812
57	201.069	167.975	33.1688
57.1	201.066	167.984	33.1656
57.2	201.037	167.991	33.1375
57.3	201.163	167.987	33.2625
57.4	200.947	167.962	33.0468
57.5	201.016	167.953	33.1156
57.6	201.084	167.959	33.1844
57.7	200.937	167.963	33.0375
57.8	200.953	167.972	33.0531
57.9	201.056	167.944	33.1562
58	201.091	167.994	33.1906
58.1	201.116	167.953	33.2156
58.2	200.956	168.003	33.0562
58.3	200.975	167.962	33.075
58.4	200.944	167.978	33.0437
58.5	201.022	168.025	33.1218
58.6	201.044	168.022	33.1437
58.7	201.2	167.966	33.3
58.8	201.125	168.009	33.225
58.9	201.116	167.953	33.2156
59	200.991	167.997	33.0906
59.1	201.047	167.972	33.1469
59.2	201.037	167.997	33.1375
59.3	200.95	167.95	33.05
59.4	200.878	168.013	32.9781
59.5	200.959	167.944	33.0594
59.6	200.894	167.994	32.9937
59.7	200.784	168.003	32.8844
59.8	200.862	167.987	32.9625
59.9	200.972	167.997	33.0718
60	200.969	168.006	33.1075

## Sheet: panel B and C
Figure 2
Figure 2B and C
	DC bias (mV)
Site of recording	n1	n2	n3	n4	n5
Abdomen	167.4	162	163.1	163.7	156
Thorax	162.4	163.6	162	162.2	154.6
Eye	158.1	161.6	163.7	160.5	157
Head	162.6	165	163.4	161.8	156.1

## Sheet: panel D-F
	Figure 2
	Figure 2E														Figure 2E																										Figure 2F
	WT														nompCf00642																										Peak potential change (-ΔmV)
	Sensillum potential (mV)														Sensillum potential (mV)																										WT	nompCf00642
	Time (s)	n1	n2	n3	n4	n5	n6	n7	n8	n9	n10	n11	n12		Time (s)	n1	n2	n3	n4	n5	n6	n7	n8	n9	n10	n11	n12	n13	n14	n15	n16	n17	n18	n19	n20	n21	n22	n23	n24		11.5	2
	20.1	48.5781	46.8094	32.2406	43.5125	39.6438	28.8938	46.9625	39.6469	30.3281	33.8625	14.3562	21.2281		20.1	26.7375	24.4906	26.1437	29.2844	24.4469	15.1781	30.2687	39.2188	40.3781	35.9156	39.1594	32.5625	38.8656	39.5719	29.6437	20.3156	36.0062	34.9063	52.0469	49.0656	55.3375	51.1969	53.7594	53.6		7	2.4
	20.2	48.5312	46.9938	32.2344	42.2125	39.65	28.9	46.9781	39.4719	30.4312	33.9906	14.4219	21.3		20.2	26.725	24.4875	26.1062	29.2469	24.4594	15.4187	30.1469	39.3031	40.4719	36.0156	39.1875	32.6406	38.7281	39.5437	29.7031	20.3062	36.0875	34.8906	51.9969	49.1656	55.2781	51.2375	53.7844	53.5531		11.6	1.3
	20.3	48.5094	46.7406	31.5875	41.1437	39.6969	28.9469	47.0187	39.4625	30.5375	34.2094	14.4562	21.3656		20.3	26.8125	24.5907	26.0844	29.3094	24.4594	15.1375	30.2969	39.4406	40.5406	36.075	39.1938	32.7437	38.7406	39.5156	29.8031	20.2844	36.1719	34.8813	51.9969	49.1875	55.2781	51.1969	53.9469	53.4875		4.8	0.9
	20.4	48.6406	46.6437	31.6844	41.8281	39.75	28.9812	46.8469	39.6125	30.525	34.2281	14.6125	21.3469		20.4	26.7438	24.5782	26.05	29.3438	24.3594	15.3562	30.2938	39.5094	40.5531	36.0907	39.2063	32.8594	38.7656	39.6469	29.6875	20.2781	36.1563	34.8719	52.0188	49.25	55.3031	51.1844	53.875	53.4937		7.2	1.9
	20.5	48.4625	46.8781	31.5094	42.3094	39.7719	29.0594	46.9062	39.4844	30.6	34.2312	14.5844	21.2469		20.5	26.4719	24.55	26.0687	29.3375	24.275	15.6	30.3094	39.525	40.6156	36.0688	39.2281	32.8719	38.8563	39.7281	29.8813	20.3406	36.2344	34.9063	52.0688	49.2312	55.4094	51.35	53.8219	53.4781		33.5	2.9
	20.6	48.4781	46.95	31.9125	42.8344	39.7781	29.0437	46.9875	39.6063	30.7688	34.2375	14.5375	21.3187		20.6	26.2844	24.6313	26.1281	29.4969	24.2281	15.6406	30.3375	39.6594	40.7625	36.1157	39.2531	32.8687	38.7875	39.7312	29.9094	20.375	36.2781	34.8969	52.0563	49.2875	55.2938	51.425	53.8625	53.4656		5.6	1.4
	20.7	48.5594	46.9687	32.3375	42.8938	39.8219	29.1344	46.9312	39.6125	30.6625	34.3625	14.5437	21.2469		20.7	26.3656	24.6813	26.0593	29.4219	24.475	15.7094	30.4031	39.75	40.825	36.1563	39.1969	32.9719	38.85	39.8313	29.9469	20.4312	36.3625	34.9188	52.0563	49.3344	55.4156	51.3375	53.8781	53.4937		26	1
	20.8	48.4344	47.0281	32.55	42.5781	39.85	29.2125	47.1125	39.5312	30.7	34.3531	14.5875	21.3813		20.8	26.325	24.6938	26.0375	29.5344	24.3187	15.9156	30.375	39.8219	40.9062	36.2156	39.2344	33.0719	38.8875	39.9406	29.8625	20.4	36.3969	34.9313	52.0969	49.2906	55.25	51.425	53.9	53.5		16.9	1.1
	20.9	48.4625	47.0687	32.3813	42.2187	39.8562	29.2063	47.0531	39.1812	30.6562	34.4188	14.6875	21.4719		20.9	26.475	24.8094	26.0344	29.5344	24.3937	16.2	30.3313	39.8563	40.9219	36.3531	39.2469	33.0563	38.9469	39.9281	30.0157	20.4656	36.5281	34.95	52.2094	49.4062	55.2344	51.4812	53.8937	53.4969		9.3	1.2
	21	47.5375	46.9781	32.7469	41.5813	39.8937	29.25	47.0063	38.8906	30.5656	34.5219	14.7438	21.3594		21	26.6313	24.8188	26.1469	29.4656	24.3562	16.0844	30.275	39.9688	40.9531	36.4	39.2562	33.15	39.0187	40.0031	30.1063	20.4531	36.6031	34.9406	52.25	49.4937	55.3062	51.4875	53.8781	53.5812		6.6	0.8
	21.1	47.4812	47.0875	33.05	40.8687	39.9813	29.2437	47.0156	38.9156	30.55	34.6562	14.8187	21.3844		21.1	26.7656	24.7781	26.2281	29.5594	24.2937	16.2063	30.2719	40.0437	41.0563	36.4468	39.2375	33.2094	39.0875	40.1	30.1687	20.4937	36.6969	34.9469	52.1688	49.4906	55.3937	51.5375	54.0219	53.6594			-1.5
	21.2	47.4406	46.9094	33.0844	40.3594	40.0125	29.1781	47.0187	38.9625	30.6938	34.6781	14.8063	21.4531		21.2	26.8437	24.8625	26.2031	29.4844	24.3625	16.2438	30.3344	40.0531	41.1375	36.5063	39.225	33.25	39.0594	40.1562	30.2218	20.4969	36.6406	34.9906	52.1906	49.3937	55.4781	51.6219	54.0969	53.7531			1.5
	21.3	47.5062	46.8594	33.125	40.6906	40.0625	29.2688	47.1375	39.2281	30.5906	34.7656	14.875	21.4656		21.3	26.7688	24.8813	26.2813	29.4844	24.6813	16.1344	30.3406	40.1031	41.1938	36.5187	39.1781	33.125	39.1625	40.2844	30.2312	20.5344	36.6719	35.0031	52.2062	49.4	55.4344	51.5563	54.1781	53.7031			1
	21.4	47.2313	46.8906	33.2094	40.8625	40.0406	29.325	47.1	39.1656	30.5531	34.7687	15.0219	21.5687		21.4	26.9281	24.9219	26.3156	29.525	24.725	16.3438	30.3532	40.1343	41.2594	36.5406	39.2563	33.2656	39.2656	40.35	30.3281	20.5281	36.7313	35.0094	52.2094	49.3687	55.4	51.5656	54.2188	53.7188			-1.5
	21.5	47.2094	47.0344	33.2344	40.3187	40.0719	29.3406	47.1156	39.1406	30.975	34.6813	15.0719	21.5437		21.5	26.6719	25.0281	26.3469	29.425	24.6125	16.1219	30.3844	40.2563	41.275	36.6032	39.1	33.2312	39.3531	40.3813	30.3781	20.5156	36.8625	35.0375	52.2844	49.4719	55.4062	51.7031	54.1906	53.6531			0.7
	21.6	47.2844	46.9312	33.1344	39.7594	40.0937	29.3188	47.1563	39.1969	30.9563	34.6688	15.1188	21.5375		21.6	26.7313	25.0469	26.45	29.5031	24.5813	15.9	30.325	40.4031	41.2312	36.6844	39.2219	33.475	39.325	40.4782	30.4313	20.5312	36.8	35.0312	52.1781	49.525	55.4281	51.7344	54.2656	53.6875			1.4
	21.7	47.1937	46.8219	33.0562	39.5719	40.1219	29.4094	47.0969	39.3281	30.8031	34.7125	15.0188	21.5719		21.7	26.8094	25.0469	26.4062	29.3562	24.5875	15.8969	30.2875	40.475	41.3687	36.7594	39.3312	33.2469	39.3687	40.5157	30.525	20.5938	36.9281	35.0312	52.2281	49.425	55.4188	51.8031	54.2875	53.6844			-0.5
	21.8	47.0438	46.925	33.1969	39.4656	40.1437	29.4281	47.175	39.3438	30.7812	34.7688	15.1063	21.6656		21.8	26.9312	25.0375	26.3187	29.4844	24.6656	16.1031	30.3282	40.525	41.3781	36.8156	39.3437	33.3969	39.4344	40.575	30.5844	20.6187	37.075	35.0469	52.3344	49.325	55.5313	51.8906	54.1875	53.7562			7.5
	21.9	47.2719	46.9	33.1719	39.4781	40.1781	29.4719	47.1688	39.4125	30.8625	34.7406	15.1281	21.6781		21.9	26.9656	24.8875	26.2938	29.5125	24.6938	16.1906	30.3969	40.6156	41.4218	36.8531	39.3	33.4375	39.4156	40.5812	30.6062	20.6594	37.1531	35.0469	52.3313	49.2938	55.6187	51.8625	54.2125	53.8438			0.8
	22	47.3094	47.0187	33.1844	39.975	40.2094	29.4469	47.2281	39.3438	30.9937	34.8031	15.1281	21.5812		22	26.8906	25.0406	26.2438	29.6625	24.5907	16.1656	30.3469	40.6437	41.4969	36.8469	39.2125	33.5875	39.6	40.7094	30.6781	20.6875	37.15	35.0469	52.6219	49.325	55.5812	51.7781	54.1875	53.8531			-2.5
	22.1	47.3625	47.0594	33.1531	40.0656	40.2125	29.4469	47.1688	39.4187	31.0281	34.8375	15.2031	21.5031		22.1	26.8375	25.1187	26.2875	29.6281	24.525	16.4438	30.2844	40.7344	41.5281	36.9156	39.3406	33.6094	39.6906	40.7407	30.7437	20.55	37.2219	35.0719	52.5906	49.4562	55.6437	51.9344	54.2375	53.8844			-2.2
	22.2	47.4281	46.975	33.2406	39.7219	40.225	29.5625	47.0812	45.1688	30.9906	34.875	15.0844	21.3625		22.2	27.0375	25.175	26.3062	29.6219	24.75	16.4344	30.3125	40.7969	41.5687	36.9281	39.2531	33.6781	39.6562	40.825	30.7531	20.5875	37.2188	35.0656	52.6781	49.5469	55.5531	51.9687	54.1688	53.8781			0.6
	22.3	47.4031	46.9281	33.275	40.1156	40.25	29.5625	47.0875	47.3969	31.2156	34.8375	15.0875	21.2594		22.3	26.9375	25.15	26.3875	29.675	24.7156	16.45	30.3	40.8625	41.55	36.9843	39.3	33.6844	39.6187	40.9031	30.7156	20.5406	37.3125	35.0969	52.6344	49.5812	55.4	51.9656	54.25	53.85			0.6
	22.4	47.5344	46.9969	33.1938	39.9844	40.2687	29.5625	47.0437	47.525	31.1562	34.8875	15.0406	21.4562		22.4	26.8125	25.4094	26.4375	29.6375	24.6594	16.4688	30.3875	40.9688	41.5969	37.0312	39.2687	33.7094	39.6375	40.8907	30.8094	20.5344	37.4094	35.0875	52.6344	49.6187	55.4875	52.0094	54.325	53.8875
	22.5	47.7312	46.9875	33.1688	40	40.2937	29.625	47.1063	47.7812	31.0094	34.8656	15.1969	21.6093		22.5	27.0625	25.3531	26.4031	29.5906	24.5188	16.7156	30.3282	40.9844	41.725	37.1281	39.1781	33.7875	39.725	40.8719	30.925	20.6125	37.5125	35.1125	52.5844	49.6187	55.6187	52.0375	54.375	53.8094
	22.6	47.8469	47.225	33.2	40.2687	40.3062	29.6531	47.125	48.0438	31.1031	34.95	15.1406	21.6375		22.6	26.9563	25.4031	26.325	29.525	24.6094	16.6	30.2344	41.0125	41.7437	37.1875	39.1313	33.9562	39.8438	40.775	30.9719	20.5188	37.4531	35.1156	52.6219	49.6594	55.6063	52.0656	54.5094	53.9406
	22.7	47.6875	47.2937	33.3	40.6031	40.325	29.7	47.1	48.1875	31.0781	34.9937	15.2125	21.5687		22.7	26.7281	25.4281	26.4031	29.5156	24.1344	16.4344	30.3	41.1187	41.8218	37.2406	39.2344	33.9969	39.8906	40.9844	30.9875	20.5781	37.4125	35.1281	52.6625	49.7281	55.6469	52.1031	54.5594	53.925
	22.8	47.7594	47.1969	33.2313	40.3969	40.3719	29.6687	47.0656	43.1844	31.3031	35.0781	15.2875	21.5906		22.8	26.6188	25.5	26.475	29.4906	24.2219	16.3531	30.2	41.1719	41.8281	37.2062	39.2562	34.0813	39.9844	41.0063	31.0312	20.6594	37.5125	35.1281	52.7625	49.7437	55.6469	52.2375	54.5781	53.9656
	22.9	48.1156	47.2344	33.2656	40.2937	40.4125	29.7937	47.0344	44.0125	31.4344	35.1125	15.3687	21.5906		22.9	26.4969	25.4344	26.4375	29.4937	24.2406	16.2156	30.1437	41.1469	41.8562	37.1937	39.2812	34.0938	39.9688	40.9906	31.0687	20.6969	37.6625	35.1406	52.8	49.8844	55.7406	52.175	54.5281	53.9563
	23	48.2563	47.0313	33.4156	40.0344	40.4281	29.8219	47.0094	45.8687	31.4719	35.1156	15.4219	21.5781		23	26.45	25.5469	26.4781	29.575	24.3844	16.2719	30.175	41.1875	41.9219	37.3563	39.25	34.0813	39.9844	41.0563	31.0969	20.6656	37.575	35.175	52.8375	49.9344	55.8156	52.2719	54.4437	54.025
	23.1	48.3781	47.1875	33.5781	40.0281	40.4406	29.8438	47.0625	45.8344	31.3719	35.1438	15.5813	21.6		23.1	26.5906	25.5937	26.55	29.4688	24.5625	16.0937	30.1094	41.2813	41.9563	37.4188	39.2687	34.2125	40.0656	41.1125	31.1813	20.6719	37.5688	35.1844	52.8375	49.9031	55.825	52.35	54.3344	54.0719
	23.2	48.4312	47.2906	33.5281	39.9594	40.4406	29.8844	47.0375	47.7094	31.4781	35.2062	15.5594	21.4781		23.2	26.6125	25.7156	26.5344	29.4531	24.1313	16.1844	30.0281	41.4468	41.8844	37.3938	39.3875	34.2	40.0594	41.1656	31.2656	20.6094	37.75	35.175	52.825	49.9781	55.9406	52.375	54.2125	54.0688
	23.3	48.4656	47.325	33.5063	39.9531	40.4937	29.9062	47.0969	51.1906	31.4031	35.4562	15.6313	21.5531		23.3	26.7438	25.8125	26.5219	29.525	23.7188	15.5656	30.1687	41.5125	42.1031	37.4781	39.4094	34.2094	40.0312	41.1469	31.2968	20.6719	37.7344	35.175	52.8906	49.9906	56.0344	52.5156	54.075	54.0812
	23.4	48.3969	47.3406	33.6469	40.2906	40.4969	29.9062	47.1063	50.3719	31.65	35.4812	15.7562	21.5344		23.4	26.8656	25.7844	26.5281	29.4688	23.8344	16.0062	30.2656	41.6812	42.1469	37.5469	39.4687	34.2125	40.0562	41.1437	31.3062	20.675	37.9313	35.175	52.9	50.0844	56.1219	52.5813	54.2219	54.1219
	23.5	48.6406	47.3656	33.5688	39.9406	40.4969	29.8312	47.15	49.4	31.6656	35.4156	15.7344	21.575		23.5	26.8844	25.9187	26.4687	29.5094	24.0625	16.2781	30.1562	41.8437	42.1625	37.575	39.4719	34.2344	40.0406	41.1156	31.4781	20.7063	37.9469	35.1812	52.825	50.1844	56.2594	52.625	54.3406	54.1281
	23.6	48.6344	47.4219	33.5	40.2188	40.5344	29.8188	47.1781	50.2344	31.6031	35.4125	15.7219	21.55		23.6	27	25.9156	26.5907	29.5094	24.4344	16.0625	30.25	41.8281	42.2188	37.6281	39.4625	34.3625	40.0656	41.075	31.5688	20.7188	37.95	35.1688	52.7063	50.2531	56.3531	52.6469	54.3219	54.1437
	23.7	48.7875	47.4438	33.5594	40.0375	40.55	29.8344	47.2125	49.5812	31.7844	35.2187	15.6594	21.575		23.7	26.8094	25.95	26.6219	29.5063	24.2969	15.9937	30.4094	41.8625	42.325	37.6406	39.5656	34.3656	40.1	41.2	31.5813	20.7625	37.9594	35.1844	52.7281	50.2031	56.4313	52.7406	54.4375	54.2125
	23.8	48.7844	47.4125	33.5688	40.2094	40.5344	29.8469	47.1938	50.7719	31.7437	35.2719	15.7219	21.5562		23.8	26.925	25.7719	26.5813	29.6125	24.2625	16.2032	30.4032	41.9469	42.3281	37.7281	39.5687	34.3937	40.1406	41.2375	31.6282	20.8219	38.025	35.2	52.7156	50.1937	56.3469	52.7594	54.5938	54.1875
	23.9	48.8656	47.45	33.5906	40.5437	40.5469	29.8469	47.2594	49.6031	31.9719	35.2781	15.8375	21.5625		23.9	26.8938	25.9562	26.6438	29.6031	24.1406	16.7344	30.3625	41.9938	42.3938	37.7406	39.5125	34.3562	40.1719	41.2062	31.6563	20.8375	37.9281	35.2094	52.7062	50.2812	56.3656	52.8219	54.6375	54.1625
	24	48.9688	47.4875	33.5875	40.4937	40.55	29.9187	47.2875	48.7687	32.1469	35.3125	15.8469	21.6906		24	27.0156	25.9187	26.6282	29.6812	24.4031	16.6687	30.275	42.0188	42.3844	37.8438	39.4313	34.4781	40.2375	41.2062	31.7562	20.8313	38.0281	35.2219	52.7469	50.3406	56.2062	52.9062	54.675	54.1531
	24.1	48.9344	47.4062	33.6781	40.6	40.5656	29.95	47.2313	50.4125	32.1906	35.3344	15.9687	21.5437		24.1	27.0781	25.8718	26.675	29.6156	24.2875	16.7844	30.3219	42.1562	42.4938	37.8438	39.4906	34.6281	40.4032	41.2313	31.7968	20.8469	38.0313	35.2312	52.8187	50.3625	56.2875	52.725	54.6781	54.1187
	24.2	48.9031	47.4531	33.6719	40.2812	40.5531	29.9875	47.2125	50.3219	32.15	35.4219	15.9812	21.5781		24.2	27.2656	25.9062	26.7157	29.7031	23.9563	16.9906	30.3813	42.1625	42.5532	37.9094	39.4656	34.5906	40.325	41.4187	31.9031	20.8531	37.9563	35.2344	52.8062	50.3031	56.125	52.9594	54.675	54.1812
	24.3	48.9594	47.5094	33.7031	40.6594	40.5469	30.0156	47.1906	50.4531	32.1313	35.375	16.1156	21.575		24.3	27.3094	25.9375	26.7469	29.7375	23.6594	16.8938	30.3688	42.2031	42.4563	37.9937	39.4906	34.7	40.3531	41.5188	31.9062	20.8469	37.9844	35.2312	52.7031	50.3563	56.2406	53.0781	54.7875	54.2375
	24.4	48.9781	47.3406	33.8375	40.7125	40.5781	30.0156	47.1813	50.3625	32.1156	35.425	16.2125	21.5469		24.4	27.1625	25.9875	26.7563	29.7812	24.1875	16.9875	30.3563	42.3	42.4907	38.0281	39.4781	34.7344	40.3782	41.4781	32.0906	20.8719	38.0469	35.2406	52.6938	50.4156	56.375	53.1281	54.8	54.3156
	24.5	49.1094	47.4781	33.7906	40.9156	40.6031	30.0156	47.2	49.9719	32.175	35.4656	16.05	21.7187		24.5	27.1219	26.0719	26.7813	29.8438	24.4313	16.9156	30.2594	42.3531	42.6219	38.0812	39.4719	34.7875	40.4282	41.5969	32.0344	20.9156	38.0906	35.2437	52.65	50.4375	56.4	53.2719	54.7656	54.3375
	24.6	48.7375	47.5281	33.7656	40.6594	40.6063	30.0125	47.2938	50.1781	32.1844	35.5094	16.2406	21.8438		24.6	27.2031	26.0718	26.7532	29.7187	24.3156	16.9937	30.4125	42.45	42.6937	37.9812	39.5063	34.8625	40.4656	41.4781	32.0594	20.9031	38.1312	35.25	52.7281	50.4187	56.5094	53.2594	54.6813	54.3094
	24.7	48.5063	47.3312	33.8656	40.3531	40.6	30.0406	47.2031	50.625	32.2344	35.5344	16.2844	21.8563		24.7	27.15	26.0312	26.7969	29.6531	24.5156	16.9844	30.5125	42.4031	42.7656	37.9625	39.5094	34.6938	40.5281	41.5375	32.1407	20.8625	38.1906	35.2531	52.5906	50.4437	56.5625	53.3375	54.8	54.2563
	24.8	48.5719	47.225	33.8281	40.6687	40.6344	29.9937	47.2188	48.35	32.2125	35.4	16.2375	21.7625		24.8	27.075	26.0844	26.7719	29.7094	24.2344	17.1562	30.4968	42.4938	42.6844	38.0375	39.5781	34.7531	40.5063	41.6281	32.0719	20.8375	38.225	35.2906	52.2	50.4187	56.5562	53.3531	54.6781	54.2844
	24.9	48.625	47.1938	33.8438	40.9438	40.6281	29.9844	47.2094	47.3313	32.2812	35.4062	16.2312	21.7813		24.9	27.1438	26.1719	26.8063	29.75	24.4531	17.2437	30.4937	42.6094	42.6375	38.1187	39.5344	34.9031	40.6031	41.7344	32.2406	20.8688	38.2656	35.3125	52.1062	50.4625	56.6906	53.4219	54.8906	54.3562
	25	48.6	47.0438	33.8937	41.0406	40.6437	29.9437	47.2656	47.1844	32.3469	35.2812	16.3469	21.9594		25	27.2094	26.2719	26.7563	29.7062	24.6844	17.1781	30.5719	42.65	42.7406	38.1156	39.525	34.9938	40.7031	41.7344	32.2844	20.8938	38.3031	35.2969	52.3594	50.5531	56.8625	53.4375	54.9688	54.35
	25.1	48.85	46.9813	33.8281	40.5906	40.6688	29.925	47.3	46.9375	32.25	35.1813	16.3	22.0937		25.1	27.25	26.2563	26.6625	29.5656	24.8031	16.9906	30.6469	42.5625	42.7406	38.1625	39.4656	35.0594	40.6531	41.8312	32.2937	20.9469	38.3094	35.3125	52.425	50.5375	56.8969	53.5	55.1094	54.3406
	25.2	48.7406	47.0156	33.9312	40.9312	40.6812	30	47.2157	47.1	32.1812	35.1406	16.3219	22.1125		25.2	27.4125	26.3	26.7313	29.4156	24.6344	16.8937	30.6344	42.5157	42.8406	38.2	39.4594	35.0438	40.6594	41.8344	32.3281	20.975	38.25	35.3125	52.6437	50.4969	57.1125	53.5406	55.0562	54.3875
	25.3	48.6969	47.0531	33.8094	41.2562	40.7	30.0375	47.1938	47.1219	32.3563	35.25	16.325	22.0875		25.3	27.5219	26.2594	26.8094	29.6094	24.8125	17.1	30.5969	42.5375	42.7625	38.2844	39.4375	35.1312	40.6969	41.8813	32.3312	20.9781	38.3469	35.3281	52.7437	50.525	56.9844	53.5781	55.0281	54.4375
	25.4	48.675	46.9406	33.8031	41.075	40.6906	30.0344	47.275	47.05	32.35	35.4125	16.3625	22.1906		25.4	27.4375	26.2719	26.8062	29.4187	24.8469	17.2031	30.6187	42.6594	42.7906	38.3625	39.3969	35.1687	40.6938	41.8094	32.3719	20.9969	38.1437	35.3375	52.7344	50.5531	57.0281	53.6406	55.1688	54.425
	25.5	48.8594	47.0562	33.875	40.8656	40.7	30.0375	47.275	47.2125	32.3906	35.3625	16.4125	22.1875		25.5	27.4344	26.25	26.825	29.4313	24.9125	17.1406	30.5812	42.7563	42.8469	38.3875	39.4781	35.1781	40.6531	41.925	32.4063	21.0187	38.2063	35.3375	52.7188	50.5969	57.0594	53.7469	55.2281	54.3875
	25.6	48.6969	47.1219	33.9094	41.0625	40.6938	30.0781	47.3312	47.05	32.5844	35.4187	16.375	22.3469		25.6	27.4469	26.2969	26.8	29.6063	24.7656	17.2219	30.6062	42.7344	42.9781	38.375	39.5719	35.1687	40.7063	42.2469	32.3969	20.8781	38.2719	35.3375	52.6938	50.6875	57.1625	53.7594	55.25	54.4375
	25.7	48.7094	47.2969	33.9344	41.1906	40.6938	30.125	47.375	46.6875	32.5781	35.5125	16.3969	22.3938		25.7	27.4781	26.2688	26.7875	29.6094	24.7406	17.1812	30.675	42.7906	42.9406	38.2875	39.5	35.2406	40.7281	41.9094	32.3906	20.9344	38.2344	35.3438	52.6219	50.75	57.1562	53.8594	55.0469	54.425
	25.8	48.6844	47.3594	34.1125	41.4438	40.7219	30.2125	47.3312	46.5938	32.5312	35.55	16.5031	22.3781		25.8	27.3969	26.2657	26.8125	29.4063	24.9063	17.1594	30.5094	42.8844	43.0563	38.2313	39.5469	35.2531	40.7969	41.8469	32.4375	20.9812	38.1875	35.3344	52.4562	50.7531	57.2969	53.7656	54.9125	54.425
	25.9	48.55	47.0906	33.9625	41.4	40.7719	30.1469	47.3063	46.8156	32.4844	35.4594	16.6875	22.5875		25.9	27.3406	26.2563	26.6531	29.3813	24.8969	17.2031	30.4094	42.9063	43.0063	38.2594	39.6094	35.3281	40.75	42.0156	32.525	21.0094	38.0562	35.3594	52.4188	50.6812	57.3687	53.8625	55.0187	54.4031
	26	48.125	47.0438	33.9594	41.1937	40.7656	30.2312	47.2688	47.1219	32.4	35.4187	16.7562	22.5281		26	27.4031	26.1594	26.7781	29.5625	25.0125	17.0031	30.5906	42.9063	43.0531	38.3219	39.6031	35.3875	40.6938	42.0813	32.6375	21.0156	38.05	35.3563	52.3625	50.7719	57.3813	53.9219	55.0875	54.4219
	26.1	48.1406	47.1375	34.0187	41.025	40.7625	30.2844	47.325	47.1187	32.2	35.4219	16.7187	22.3813		26.1	27.4344	26.1062	26.6407	29.7	25.0219	17.2594	30.5687	42.9187	43.0313	38.3844	39.5656	35.4437	40.7656	42.0938	32.6844	20.9906	38.3	35.3813	52.2875	50.8094	57.4094	54.0312	55.1	54.4656
	26.2	48.1688	47.3594	33.9937	40.9594	40.7875	30.3125	47.4031	47.2188	32.1406	35.4406	16.5188	22.5531		26.2	27.5437	26.1688	26.8187	29.6625	25.0406	17.2781	30.6812	42.9656	43.0156	38.3563	39.625	35.5438	40.5782	42.1719	32.7032	21.0375	38.2625	35.3937	52.3875	50.6937	57.5031	54.0344	55.1	54.4125
	26.3	48.2938	47.8969	33.9156	41.0937	40.7875	30.375	47.3031	47.2062	32.3375	35.3594	16.4937	22.5406		26.3	27.6375	26.1813	26.7844	29.7406	24.9281	17.2937	30.7219	42.9844	42.9625	38.4	39.625	35.6062	40.4531	42.1906	32.7375	21.0375	38.2281	35.3813	52.5969	50.7812	57.5563	54.1219	55.1062	54.3844
	26.4	48.2937	48.3094	34.0875	41.1187	40.7781	30.3406	47.4	47.2531	32.3031	35.375	16.5469	22.375		26.4	27.6906	26.2406	26.8188	29.7875	25.0875	17.3281	30.6156	43.0657	43.0406	38.4281	39.6313	35.6906	40.2437	42.1344	32.8062	20.9281	38.2687	35.3813	51.5531	51.0719	57.6219	54.1719	55.1375	54.4281
	26.5	48.425	48.6125	34.05	40.9063	40.825	30.3594	47.3094	47.525	32.3438	35.4281	16.6188	22.4469		26.5	27.7312	26.3531	26.8469	29.8	25.1469	17.3906	30.65	43.0781	43.0875	38.4375	39.5844	35.6594	40.3281	42.2219	32.8344	21.0031	38.1281	35.3937	47.9	51.0438	57.6562	54.2594	55.0969	54.4188
	26.6	48.0969	49.0156	34.0187	40.8219	40.8312	30.375	47.3406	47.4844	32.4	35.3531	16.5844	22.4906		26.6	27.6813	26.3969	26.8469	29.7781	25.2625	17.5	30.7281	43.0969	43.1625	38.4781	39.6625	35.7094	40.3844	42.2781	32.8969	21.0969	38.0188	35.3969	47.4688	50.9875	57.4656	54.25	55.225	54.4781
	26.7	47.8594	49.2719	34.05	40.8375	40.85	30.3594	47.3937	47.575	32.4469	35.6031	16.5469	22.4688		26.7	27.7969	26.3656	26.9031	29.825	25.4125	17.6218	30.6187	43.175	43.2063	38.5187	39.6969	35.7625	40.3813	42.1156	32.9156	21.0688	38.1594	35.3969	47.2094	51.0469	57.6906	54.3	55.2531	54.4312
	26.8	47.8281	49.4781	34.1406	40.7719	40.8719	30.3875	47.375	47.6375	32.5906	35.5656	16.6188	22.4094		26.8	27.7188	26.3844	26.9312	29.8062	25.5719	17.4594	30.8563	43.1937	43.2187	38.5375	39.7375	35.8	40.2656	42.15	32.9625	21.0656	38.2188	35.4	3.38437	51.0906	57.7781	54.3625	55.1844	54.4781
	26.9	48.0031	49.9594	34.25	41.0219	40.8937	30.3969	47.325	47.5844	32.6625	35.4656	16.725	22.3969		26.9	27.6625	26.4875	26.9469	29.7187	25.5906	17.3812	30.7813	43.1843	43.225	38.5656	39.7	35.7688	40.1343	42.2593	33.0438	21.0938	38.2406	35.3937	46.2969	51.1594	57.7781	54.3312	55.1906	54.3094
	27	48.05	50.0781	34.0562	41.5719	40.9	30.4125	47.3531	47.3937	32.9219	35.125	16.6875	22.2563		27	27.5594	26.5219	26.7406	29.8469	25.7125	17.2844	30.8188	43.25	43.25	38.5187	39.7031	36.0281	40.0781	42.3312	33.0406	21.1531	38.325	35.4	51.4875	51.1	57.7875	54.3687	55.225	53.9469
	27.1	48.2031	49.8531	33.9062	41.3906	40.9094	30.4344	47.4093	47.3656	32.9844	34.5656	16.6656	22.1469		27.1	27.3062	26.4844	26.8031	29.875	25.5719	17.5281	30.8156	42.7969	43.1906	38.4812	39.825	36.0281	40.2312	42.3031	33.0531	21.1469	38.2656	35.425	51.8844	51.1313	57.8687	54.325	55.1812	54
	27.2	48.3937	49.8687	34.0063	41.325	40.9656	30.5031	47.3781	47.2063	32.7531	35.0844	16.6594	22.2907		27.2	27.2344	26.3687	26.6438	29.8937	25.5844	17.3437	30.8438	42.8844	43.2281	38.5187	39.7156	36.075	40.2062	42.2719	33.1093	21.1906	38.1875	35.4219	52.1063	51.1156	57.8719	54.2625	55.4406	54.1281
	27.3	48.525	50.1406	34.0125	41.3469	40.975	30.4344	47.4218	47.2531	32.8594	35.2125	16.7969	22.3125		27.3	27.4688	26.4687	26.325	29.9375	25.7219	17.225	30.7625	42.9531	43.25	38.5813	39.7062	36.0812	40.2219	42.2812	33.1219	21.175	38.2875	35.3813	52.3125	51.1562	57.9594	54.225	55.5	54.2125
	27.4	48.575	50.2031	33.9844	41.375	41.0031	30.3656	47.4812	47.1531	32.6844	35.2906	16.8531	22.1938		27.4	27.2406	26.4531	26.2594	29.9406	25.6281	17.625	30.8	43.1656	43.2906	38.6407	39.6688	36.1906	40.3156	42.25	33.1375	21.2125	38.3406	35.4	52.5375	51.2594	57.95	54.1594	55.4844	53.8406
	27.5	48.5	50.1187	34.0656	41.4969	41.025	30.4344	47.5594	46.9625	32.7719	35.3187	16.8156	22.0875		27.5	27.3312	26.5156	26.0812	30.0781	25.4469	17.6844	30.9281	42.9844	43.3344	38.6563	39.7062	36.1906	39.9031	42.4219	33.1437	21.1688	38.1469	35.3906	52.6938	51.2687	57.9656	53.8781	55.5156	54.0469
	27.6	48.2125	50.15	34.0375	41.3844	41.0469	30.5063	47.6094	47.0875	32.8344	35.15	16.7219	22.1719		27.6	27.3469	26.5438	26.3125	29.95	24.3	17.5469	30.95	42.8531	43.3125	38.6906	39.35	36.1063	39.9781	42.4844	33.2437	21.1625	38.2156	35.4375	52.7344	51.3125	57.9719	54.0219	55.4656	54.0156
	27.7	48.0312	50.1625	34.0063	41.8375	41.0188	30.5188	47.6	47.0063	32.9813	35.225	16.6219	22.25		27.7	27.3469	26.5563	26.425	30.0125	24.9813	17.4906	30.8844	42.8094	43.1813	38.7469	39.3156	36.3438	39.6219	42.5406	33.2406	21.1594	38.1687	35.4562	52.8687	51.375	58.0719	53.9469	55.625	54.0844
	27.8	46.5687	50.2156	34.0531	41.7219	41.0438	30.575	47.6	46.925	32.7844	35.3469	16.7188	22.2437		27.8	27.4563	26.5281	26.25	30.0593	25.5594	17.5969	30.8407	42.9844	42.9	38.7719	39.7469	36.2438	39.7531	42.5094	33.2875	21.15	38.2438	35.4906	52.9187	51.4312	58.1094	54.2125	55.5875	53.5656
	27.9	46.8313	50.0687	33.9688	41.6375	41.0562	30.5219	47.5531	46.8437	32.9781	35.2563	16.8344	22.1406		27.9	27.4156	26.5469	25.8875	30.1437	25.6031	17.6437	30.9282	42.9281	42.975	38.8031	40.0468	36.2719	39.9781	42.4063	33.3812	21.1406	38.1469	35.5	53.0187	51.3	58.2281	54.1187	55.5875	53.4625
	28	46.3906	50.0594	33.9531	41.5406	41.0469	30.5813	47.5719	46.9281	33.0312	35.2812	16.7031	22.2062		28	27.5219	26.4844	26.1844	30.0968	25.55	17.7312	30.8782	42.9188	43.1062	38.8438	40.1062	36.25	40	42.4907	33.4281	21.1781	38.1094	35.5312	53.125	51.2562	58.3156	54.2188	55.5656	53.7125
	28.1	46.4937	50.1781	33.7875	41.9531	41.05	30.6656	47.5813	46.8344	32.8719	35.3531	16.7156	22.1969		28.1	27.45	26.3375	26.2063	30.1312	25.5625	17.7531	30.9375	43.1063	43.1937	38.9281	39.5188	36.3844	40.0344	42.5531	33.4156	21.1125	38.1406	35.5562	53.0875	51.4406	58.3313	54.4344	55.6	53.7094
	28.2	46.2969	50.1781	33.7563	42.0281	41.0344	30.6531	47.5438	46.7781	32.9906	35.4062	16.6906	22.1969		28.2	27.5531	26.3375	26.2094	30.1062	25.5625	17.8813	30.925	43.1312	43.2219	38.8219	39.3844	36.4688	40.1906	42.55	33.4062	21.1594	38.2	35.5938	53.1625	51.4063	58.3	54.5219	55.6375	53.5563
	28.3	46.275	50.0906	33.8531	41.9438	41.0688	30.6062	47.5094	46.7063	33.3312	35.55	16.7344	22.2344		28.3	27.6562	26.4718	25.9469	30.1562	25.7312	17.8594	30.8875	43.2438	43.3906	38.8719	39.4656	36.4406	40.2719	42.5094	33.4781	21.2	38.2125	35.6219	53.2375	51.5906	58.3156	54.6312	55.5594	53.5281
	28.4	45.9594	50.0375	33.875	42.0344	41.0687	30.5625	47.5969	46.8312	33.2313	35.5688	16.8719	22.2		28.4	27.6	26.5719	25.9687	30.0719	25.7219	17.9594	30.9156	43.2657	43.3406	38.8813	39.8188	36.5312	40.2531	42.6437	33.4969	21.2344	38.1594	35.6406	53.25	51.6469	58.3594	54.6469	55.5969	53.4219
	28.5	45.7594	49.9344	33.95	42.2406	41.0906	30.5688	47.5875	46.8469	33.0844	35.6656	16.8	22.175		28.5	27.4125	24.8875	26.0656	30.2062	25.75	17.8938	30.8719	43.2375	43.3687	38.8969	40.7094	36.6313	40.1906	42.6844	33.3563	21.25	38.2313	35.6562	53.35	51.6437	58.6281	54.6219	55.5	53.7312
	28.6	46.1312	49.9031	33.9531	42.0562	41.0937	30.5437	47.5312	46.9313	33.2156	35.6875	16.8656	22.3625		28.6	26.0938	23.8875	26.025	30.1812	25.7281	17.8344	30.8907	43.2125	43.3875	38.925	40.8063	36.5406	40.25	42.8031	33.3969	21.2656	38.2313	35.6594	53.3656	51.7719	58.6063	54.6313	55.4969	53.4344
	28.7	46.3719	49.7938	33.9969	42.1469	41.1312	30.5125	47.5469	46.7938	33.3375	35.7219	16.7969	22.4563		28.7	25.7156	23.7687	26.0687	30.2656	25.7594	18.0031	30.8531	43.2406	43.2656	38.925	40.9469	36.5844	40.075	42.7906	33.5375	21.2875	38.1063	35.6656	53.4156	51.6969	58.5031	54.7219	55.5281	53.575
	28.8	46.6344	49.7906	33.9625	42	41.15	30.5125	47.5594	46.8094	33.3406	35.85	16.7406	22.3469		28.8	27.2063	24.0781	26.0062	30.2219	25.7812	17.325	30.825	43.3469	43.3656	39.0125	40.9313	36.6531	40.125	42.7188	33.5	21.2969	38.0375	35.675	53.3875	51.775	58.5344	54.7844	55.5188	53.6594
	28.9	46.3281	49.8219	33.8219	42.3	41.1531	30.5813	47.6781	46.8719	33.3406	35.7594	16.725	22.6375		28.9	27.3812	25.5219	26.0812	30.1843	25.7094	17.3187	30.7188	43.3344	43.3	38.9844	40.625	36.6407	40.2062	42.6625	33.5844	21.3094	38.0313	35.6938	53.5344	51.8594	58.4	54.7469	55.575	53.6594
	29	46.5438	49.7563	33.8969	42.1031	41.1562	30.5063	47.6344	46.8656	33.4281	38.0438	14.2531	22.6969		29	27.6375	26.0656	26.0468	30.1937	25.6062	17.8437	30.875	43.3469	43.1844	39.0125	39.3969	36.7781	40.1187	42.7094	33.6656	21.2937	38.0563	35.7219	53.575	51.875	58.5625	54.8438	55.5969	53.5344
	29.1	46.4531	49.8063	33.8438	42.0281	41.1625	30.4563	47.7469	46.6594	33.3125	39.3969	11.9875	22.825		29.1	27.7594	26.0406	26.075	30.2813	25.7625	17.3375	30.9281	43.3906	43.0156	38.9906	39.1875	36.8563	40.175	42.75	33.625	21.2531	37.9469	35.7406	53.6281	52.8969	58.4625	54.8781	55.65	53.7125
	29.2	46.1531	49.8188	33.8094	42.0531	41.1781	30.4937	47.7594	46.275	33.4062	39.7594	12.4625	22.7531		29.2	27.7531	26.2031	26.1031	30.3156	25.7781	17.8875	30.9406	43.4187	42.9875	38.975	39.2	36.8844	40.3656	42.8625	33.65	21.2375	38.0531	35.75	53.6094	52.9344	58.6656	54.8375	55.5844	53.7156
	29.3	46.3188	49.875	33.8188	42.2469	41.2031	30.5188	47.7188	46.1937	33.4313	39.6906	13.5969	22.7875		29.3	27.8031	26.0531	26.0969	30.3063	25.6969	17.1219	31.0063	43.4031	43.1938	39.0281	39.0594	36.9	40.2312	42.8469	33.7812	21.2094	38.1688	35.7656	53.6313	53.0688	58.8656	54.8812	55.5625	53.7531
	29.4	46.4594	49.9	33.7719	42.5812	41.1938	30.5094	47.675	46.2531	33.4656	39.6969	14.3531	22.7625		29.4	27.5562	26.3531	26.0938	30.2781	25.65	16.8563	30.9188	43.4062	43.2312	39.0281	39.1469	36.9281	40.3125	42.8625	33.7875	21.2125	38.2313	35.7875	53.7219	53.0219	59.0875	54.9188	55.5406	53.7625
	29.5	46.5375	50.0562	33.8625	42.7188	41.2031	30.5219	47.6563	46.0344	33.5125	39.5656	14.3437	22.8469		29.5	26.4938	26.4	25.9875	30.2906	25.4406	16.9594	31.05	43.4844	43.175	39.0344	39.0812	36.8188	40.2562	42.8625	33.7812	21.2187	38.2031	35.8156	53.7781	53.0844	59.1875	54.8406	55.4844	53.6094
	29.6	46.7719	49.9969	33.8375	42.6344	41.1187	30.4719	47.6938	45.65	33.5156	39.6406	14.4031	22.9563		29.6	26.6156	26.3937	26.175	30.3031	25.6562	16.5344	30.95	43.5656	43.3219	39.0312	39.1031	36.9594	40.2875	42.9219	33.85	21.2125	38.1688	35.825	53.7781	53.1469	59.2156	54.8844	55.5687	53.7188
	29.7	46.7656	49.9156	33.8188	42.5875	41.1531	30.4844	47.7531	45.8312	33.4281	39.4969	14.2594	23.025		29.7	26.7	26.4469	26.2844	30.4	25.6468	16.0469	30.9281	43.3844	43.3375	39.0656	39.0812	36.625	40.2875	42.9688	33.8687	21.2156	38.2063	35.8094	53.8594	53.0594	59.2062	55.0688	55.5812	53.5687
	29.8	47.0156	49.7281	33.9906	42.8031	41.1875	30.4406	47.8125	45.825	33.3188	39.3781	14.5062	22.9312		29.8	26.9375	26.2	26.2969	30.3625	25.7281	16.3	30.9313	43.3937	43.3563	39.0562	39.1719	36.7375	40.2469	43.0875	33.8781	21.1531	38.1812	35.8156	53.8687	53.1625	59.3938	55.2094	55.6094	53.5969
	29.9	46.9781	49.4594	33.8844	42.775	41.1781	30.2969	47.8281	45.6469	32.8531	39.1656	14.4125	23.0968		29.9	26.9187	25.9656	26.2438	30.4125	25.7937	16.0813	30.9156	43.3781	43.3031	39.125	39.0938	36.6406	40.3594	43.1469	33.9906	21.0656	38.125	35.8156	53.9187	53.1844	59.3313	55.2469	55.5063	53.6219
	30	46.3781	48.9969	33.8219	42.8344	41.1375	30.4375	47.8594	45.5531	32.7281	38.1562	13.8406	22.9812		30	27.0406	25.9	26.4344	30.25	25.6	15.9094	30.6719	43.4562	43.3312	39.2406	39.1094	36.7094	40.2844	43.1687	33.9718	21.05	37.9781	35.8312	53.8594	53.2437	59.4	55.4344	55.5063	53.575
	30.1	45.7812	48.35	33.7781	42.5281	41.1656	30.5469	47.2906	44.1344	26.3344	35.4219	9.67187	22.8344		30.1	26.825	25.7719	26.4312	30.2031	25.6	15.9219	30.8094	43.4937	43.3094	39.2281	39.1375	36.6344	40.1969	43.1906	33.9187	21.1156	37.9719	35.8719	53.8375	53.1969	59.4219	55.4313	55.65	53.5094
	30.2	45.2938	48.2906	33.1281	42.2469	41.1406	30.4969	45.6469	28.6594	21.0312	33.4	6.79375	21.2281		30.2	26.9531	25.5781	26.4938	30.3344	25.5375	15.8125	30.7188	43.5969	43.2531	39.2125	39.0344	36.35	40.1656	43.2656	33.9937	21.0656	38.0188	35.8844	53.975	53.2125	59.4312	55.5313	55.6406	53.4844
	30.3	44.7875	48.2344	32.2281	42.2531	41.1281	30.5063	44.1531	27.2563	19.7406	29.3906	6.55	21.325		30.3	26.8938	25.2719	26.5406	30.2813	25.5375	15.4	30.7219	43.5812	43.2875	39.25	39.0281	36.3531	40.2062	43.3156	33.9906	21.0469	37.9844	35.8844	53.5781	53.2531	59.3625	55.5437	55.6875	53.5562
	30.4	42.5094	48.0969	31.8	42.3094	41.1281	30.525	44.2281	26.0875	19.2906	29.1094	6.4625	21.375		30.4	26.6812	25.0563	26.5406	30.3594	25.725	14.6688	30.2219	43.6094	43.2969	39.2719	39.0688	36.375	40.2406	43.3156	33.9469	21.0563	37.425	35.8938	48.2219	53.2687	59.4312	55.5719	55.7469	53.525
	30.5	39.3281	47.375	32.1469	42.6062	40.5875	30.3781	44.0219	25.675	19.0813	28.6719	6.4	21.3719		30.5	26.775	24.7031	26.6063	30.275	24.9844	14.8938	30.3719	43.6719	43.2437	39.3	39.1094	36.3781	40.2	43.3282	34.0219	21.1125	37.2906	35.9125	48.0312	53.3031	59.5281	55.6031	55.775	53.6469
	30.6	41.0688	47.5969	33.2437	42.6187	36.0906	29.9125	43.9625	25.1406	18.3625	28.2563	6.325	20.7781		30.6	26.8125	24.5281	26.6313	30.2187	25.2219	14.9875	30.4844	43.5813	43.3656	39.2875	39.1125	36.4813	40.2	43.3094	34.025	21.0719	37.5969	35.9281	47.8219	53.1812	59.4219	55.5969	55.7719	53.55
	30.7	41.0438	47.4312	33.35	42.7031	34.4406	29.4625	44.1375	24.35	18.1875	27.8281	6.39687	19.9906		30.7	26.75	24.4062	26.6469	30.2688	25.5156	14.9063	30.45	43.6937	43.3031	39.3156	39.0563	36.4781	40.2344	43.3656	34.0532	21.0813	37.5187	35.9406	47.6688	52.9906	59.4031	55.675	55.7188	53.5
	30.8	40.9156	47.4844	28.6688	42.8062	31.6375	29.6406	44.2344	23.8469	18.2344	27.075	6.075	20.3437		30.8	26.7844	24.2062	26.7281	30.2187	25.65	15.2281	30.4406	43.6531	43.4218	39.375	39.1563	36.4375	40.1844	43.4281	34.0438	21.0094	37.6281	35.95	47.4625	53.1344	59.2281	55.5062	55.6062	53.4687
	30.9	40.7094	47.4625	30.2	42.7375	29.6781	29.6781	44.65	23.1	18.0406	27.2125	5.6625	20.0094		30.9	27.1156	24.1594	26.6469	30.3188	25.6	15.15	30.3812	43.5281	43.375	39.3312	39.1469	36.5938	40.1562	43.4218	34.1313	21.0813	37.625	35.9531	47.225	53.125	59.35	55.65	55.575	53.5156
	31	40.45	47.6375	29.2344	42.9562	29.3531	29.7844	44.2062	22.8594	17.8531	27.2688	5.70937	19.6781		31	26.9219	24.1625	26.6406	30.3031	25.7687	13.9687	30.2188	43.6375	43.4406	39.3219	39.0469	36.4469	40.2531	43.3719	34.1656	21.1438	37.75	35.9719	47	53.2437	59.4031	55.6344	55.5812	53.5156
	31.1	40.4062	47.4125	28.7937	42.7375	28.5688	29.7969	44.9438	22.4844	17.9344	26.8156	6.12812	19.3406		31.1	27.0813	24.1781	26.6813	30.35	25.7531	13.5094	30.0531	43.7968	43.3125	39.3218	39.1094	36.6438	40.2156	43.3844	34.2344	21.1188	37.5	35.9719	47.0375	53.2812	59.4344	55.675	55.5844	53.4656
	31.2	40.35	47.5344	28.7281	42.8375	27.9844	29.7125	43.1438	22.1937	17.6563	26.8906	6.15937	19.6844		31.2	26.925	23.8906	26.7406	30.1687	25.6406	13.7781	30.2062	43.7968	43.3906	39.3562	39.0375	36.5094	40.1531	43.3687	34.2469	21.1375	37.4187	35.9594	46.8687	53.3219	59.5781	55.6594	55.5906	53.6781
	31.3	40.2875	47.4187	28.5625	42.6813	27.3562	29.8812	43.0687	21.9156	17.55	26.8906	6.1	19.375		31.3	27.2156	23.9656	26.8219	30.2687	25.55	14.575	30.3406	43.7656	43.3219	39.3469	39.0125	36.6594	40.2719	43.4375	34.2563	21.1906	37.4531	35.9594	46.825	53.4438	59.675	55.7406	55.5656	53.6375
	31.4	40.1875	47.4469	28.3594	42.6094	26.7875	28.8906	42.6031	21.8656	17.4312	26.875	6.0125	19.0219		31.4	27.1031	23.9813	26.6938	30.2594	25.8219	13.8875	30.4594	43.7406	43.5844	39.3281	39.0562	36.6906	40.25	43.3937	34.2469	21.2094	37.4688	35.975	46.9031	53.4406	59.7531	55.7719	55.6219	53.6313
	31.5	40.075	47.4688	28.7969	42.8625	26.1969	24.2	42.8	21.7781	17.7625	26.8438	6.29375	18.6156		31.5	27.2094	23.85	26.8375	30.2844	25.6718	14.1813	30.5875	43.7719	43.45	39.3937	39.0406	36.7844	40.1469	43.5719	34.2781	21.2469	37.1625	35.975	46.8719	53.2937	59.8062	55.9188	55.7094	53.6813
	31.6	39.8812	47.525	28.8031	42.8156	25.9063	22.2281	42.6656	21.7438	17.6625	26.8281	6.34063	18.5937		31.6	27.3844	23.9625	26.7406	30.3844	25.6625	14.2656	30.5531	43.7594	43.4219	39.3281	39.0406	36.8375	40.2031	43.5594	34.275	21.2	37.3469	35.9875	46.775	53.4187	59.925	55.9906	55.6875	53.7312
	31.7	39.6938	47.5219	28.6594	42.9906	25.6188	22.1438	42.8875	21.2594	17.2969	26.7	6.29688	18.1281		31.7	27.3906	23.9125	26.7781	30.3	25.1594	14.8937	30.4281	43.7906	43.4406	39.3719	39.0562	36.95	40.1375	43.5406	34.3031	21.2312	37.5469	35.9937	46.725	53.4063	60.0063	56.0156	55.5937	53.7344
	31.8	39.5094	47.6	28.5937	42.8094	25.475	18.8625	43.0625	21.2719	17.3375	26.4688	6.42812	17.8844		31.8	27.3062	24.0031	26.7563	30.3313	25.2781	14.6219	30.4781	43.8562	43.3031	39.3656	39.075	36.8531	40.1937	43.4906	34.2657	21.2312	37.4344	36.0094	46.7156	53.4031	59.9719	55.9656	55.3781	53.575
	31.9	39.3656	47.2687	28.9406	42.7375	25.3438	13.2906	43.1906	21.6812	17.6125	26.6531	6.3875	17.9937		31.9	27.2781	23.9094	26.7656	30.2688	25.7875	14.1656	30.4281	43.9469	43.3906	39.3906	39	36.9031	40.3	43.55	34.3375	21.2469	37.3813	36.0281	46.7406	53.3156	59.9156	56.0562	55.4594	53.5844
	32	39.1906	46.7063	28.0594	42.8594	25.1219	6.76875	43.475	21.2844	17.0312	26.5	6.85	18.0688		32	27.2156	23.9969	26.7969	30.3031	25.8281	13.9187	30.2406	43.9437	43.3813	39.4594	39.05	36.9094	40.2906	43.6281	34.3437	21.2906	37.5219	36.0625	46.7344	53.2625	60.0312	56.0531	55.4844	53.5969
	32.1	39.0469	46.7437	26.5625	42.8875	24.9375	3.03125	43.4125	20.8844	17.0375	26.4969	6.79688	18.1125		32.1	27.2781	24.125	26.6219	30.375	25.95	14.2844	30.1125	43.9281	43.3563	39.4781	39.0594	37.0313	40.0937	43.4281	34.3718	21.2656	37.6156	36.0562	46.65	53.2969	60.0031	56.075	55.5562	53.6688
	32.2	38.9406	46.6594	25.1844	42.9781	24.775	0.340625	43.7812	21.1219	17.3438	26.4312	6.93125	18.225		32.2	27.2906	24.1813	26.6875	30.4156	25.5344	14.5125	29.9031	44.0188	43.3594	39.4625	39.1344	37.0219	40.1125	43.5219	34.3781	21.2687	37.4937	36.0625	46.7	53.3781	60.175	56.1125	55.5437	53.675
	32.3	38.8094	46.5531	27.1031	43.2281	24.6625	-0.475	43.8906	20.9406	17.4594	26.3844	6.63438	18.4625		32.3	27.4407	24.1969	26.8781	30.4156	25.4219	14.6719	29.8969	43.8812	43.3906	39.4813	39.1781	37.2531	40.1281	43.5781	34.4125	21.2781	37.4437	36.0656	46.6906	53.2938	60.2	56.0875	55.3844	53.6687
	32.4	38.7375	46.4937	30.3781	43.0375	24.4688	-1.20938	43.8969	20.8187	17.475	26.1281	7.05312	18.7906		32.4	27.4375	24.2594	26.8375	30.3125	25.475	14.7906	29.8875	43.875	43.4468	39.4562	39.15	37.1844	40.0063	43.6469	34.3969	21.2781	37.5844	36.0844	46.6437	53.2187	60.1188	56.1844	55.475	53.5406
	32.5	38.6531	46.4219	30.3656	43.2469	24.4063	-1.49063	44.1375	20.8969	17.3031	26.0844	7.44688	18.7656		32.5	27.25	24.3187	26.9407	30.4281	25.5313	14.9031	30.0281	43.8531	43.3969	39.4687	39.125	37.1813	40.0656	43.5688	34.425	21.3281	37.5094	36.1031	46.6406	53.3125	60.0469	56.0875	55.5344	53.6156
	32.6	38.5281	46.3094	30.5281	43.1875	24.2875	-1.76875	44.2312	21.0875	17.0375	26.1031	8.03438	19.2094		32.6	27.1969	24.3156	26.8781	30.3687	25.5969	14.7719	30.0625	43.8593	43.4094	39.375	39.0625	37.2437	40.1812	43.5969	34.5	21.3062	37.5125	36.1	46.6156	53.275	60.2844	56.1844	55.5281	53.675
	32.7	38.5375	46.0281	29.8719	43.0938	24.1031	-2.06562	44.0375	20.8219	16.7812	25.8594	7.90938	19.5125		32.7	27.1625	24.3906	26.925	30.4625	25.6437	14.7219	30.0031	43.9531	43.3969	39.4344	39.0906	37.3219	40.2031	43.5656	34.6125	21.3625	37.4594	36.1031	46.5844	53.4469	60.2781	56.2219	55.5438	53.6469
	32.8	38.325	46.1437	29.875	43.2375	23.9187	-2.425	44.2313	21.2219	17.0156	25.9125	8.26562	18.2125		32.8	27.4438	24.4406	27.025	30.3219	25.7688	15.2063	29.9438	44.0156	43.3625	39.4813	39.1156	37.2313	40.1187	43.6125	34.5313	21.4094	37.6906	36.1	46.5438	53.4156	60.4625	56.2438	55.6875	53.5687
	32.9	38.1375	46.2031	29.8406	43.1781	23.5688	-2.74063	44.4562	21.2188	17.2844	25.9531	7.83437	19.1313		32.9	27.3188	24.35	26.8156	30.3969	25.8437	14.7031	30.0406	44.1094	43.3937	39.4781	39.0469	37.2219	40.175	43.5531	34.4219	21.3937	37.5375	36.0906	46.5531	53.4719	60.3781	56.3406	55.7156	53.6156
	33	37.6719	46.1437	29.8969	43.45	22.9437	-2.73438	44.4406	21.1125	17.1625	26.1625	8.27812	19.6344		33	27.4719	24.4969	26.9344	30.425	25.8844	14.8219	30.1844	44.0688	43.3813	39.4781	39.0906	37.2375	40.0875	43.5594	34.5	21.3969	37.4469	36.1063	46.5969	53.4531	60.525	56.3437	55.6219	53.6281
	33.1	37.4937	45.8969	30.1844	43.3438	22.7375	-2.9375	44.6187	21.0594	17.1469	26.2	8.20625	20.4719		33.1	27.3781	24.3875	26.8531	30.4719	25.675	15.0968	30.1562	43.925	43.5281	38.9	39.075	37.2219	40.0437	43.6219	34.3937	21.3656	37.55	36.1313	46.5219	53.4031	60.6687	56.3563	55.4406	53.6063
	33.2	37.8781	45.9156	30.2156	43.4531	22.5687	-2.925	44.5438	20.8813	17.0781	26.2062	8.44375	20.4469		33.2	27.2844	24.2937	26.9375	30.3813	25.9312	15.2656	30.2625	43.9281	43.475	39.1531	39.1219	37.3937	40.0281	43.5687	34.55	21.3563	37.5812	36.1188	46.4781	53.4375	60.7594	56.3656	55.6219	53.5562
	33.3	40.8437	45.9625	30.1719	43.3625	22.4656	-3.05	44.7062	20.7594	17.1937	26.4531	8.87813	20.7125		33.3	27.3156	24.4656	27.2469	30.425	25.6625	15.1937	30.3313	44.0313	43.525	39.1938	39.1656	37.3844	39.95	43.5469	34.5657	21.4	37.5781	36.1094	46.5094	53.4312	60.8187	56.3938	55.6656	53.4656
	33.4	41.2594	46.0969	30.1719	43.1406	22.3031	-3.03125	44.775	20.7844	17.3094	26.4844	8.8375	20.8063		33.4	27.4531	24.5125	27.1313	30.4125	25.85	15.5906	30.3781	44.1063	43.5219	39.2281	39.2594	37.45	40.0281	43.5219	34.6844	21.4344	37.6281	36.1156	46.4719	53.3781	60.7906	56.45	55.7062	53.5344
	33.5	42.5688	45.9719	30.2812	43.3812	22.1156	-3.09687	44.8062	20.5625	17.0594	26.175	8.725	20.8406		33.5	27.5781	24.5094	27.0375	30.3438	25.7687	15.6344	30.3438	44.15	43.5875	39.2156	39.2968	37.5812	40.0906	43.4562	34.475	21.3844	37.5125	36.1094	46.5312	53.5344	60.7562	56.3344	55.6062	53.5219
	33.6	44.1906	45.9719	30.1719	43.3906	22.0531	-2.96875	44.8156	20.7156	17.0719	26.2344	8.61563	20.6594		33.6	27.7281	24.5375	27.1625	30.3125	26.0094	15.45	30.3375	44.1594	43.7062	39.3125	39.3	37.6156	40.15	43.6344	34.1	21.3781	37.5594	36.125	46.5562	53.5094	60.8594	56.2844	55.6031	53.5281
	33.7	44.7125	45.6656	30.4187	43.175	21.9531	-2.72188	44.8656	20.7063	17.0719	26.1031	8.37187	20.4469		33.7	27.6	24.6969	27.2219	30.3594	26.0469	15.7344	30.4438	44.175	43.6125	39.3437	39.2094	37.6281	40.1437	43.6531	34.3656	21.4469	37.6531	36.1344	46.5656	53.6031	60.8969	56.4719	55.6437	53.5812
	33.8	45.4687	45.7344	30.5656	43.3469	21.8094	-2.375	44.8063	20.6375	17.2875	25.9875	8.77187	20.475		33.8	27.7375	24.6875	27.1906	30.35	26.1125	15.6531	30.6187	44.125	43.7281	39.2719	39.1688	37.6187	40.05	43.6125	34.3594	21.45	37.7531	36.1313	46.5969	53.6125	60.9656	56.5438	55.5875	53.5406
	33.9	45.9906	45.8344	30.5656	43.5719	21.775	-2.23125	44.8625	20.4938	17.2563	26.1906	9.00625	20.5031		33.9	27.6594	24.825	27.1781	30.25	25.9312	15.7844	30.6469	44.0875	43.6938	39.375	39.2094	37.6344	40.1344	43.6188	34.3719	21.4094	37.7688	36.1375	46.5938	53.6406	61.0531	56.5406	55.5594	53.5094
	34	46.0094	45.7844	30.5938	43.1031	21.7781	-2.00625	44.95	20.6844	17.3625	26.1469	8.84062	20.1219		34	27.7656	25.0219	27.0719	30.225	26.0187	15.8469	30.6031	44.2343	43.55	39.3531	39.1688	37.7344	40.0094	43.7187	34.4594	21.3438	37.6625	36.1469	46.5688	53.6406	61	56.5031	55.6781	53.5406
	34.1	45.7562	45.5938	30.4875	43.3594	21.6781	-1.87187	44.8469	20.3438	17.4	26.0656	9.19688	20.4094		34.1	27.6781	25.175	27.25	30.2813	26.2312	15.9031	30.6687	44.2843	43.5219	39.275	39.2281	37.7375	39.9937	43.7406	34.4375	21.4219	37.5625	36.1406	46.5969	53.6531	61.0312	56.6312	55.6156	53.5094
	34.2	45.9219	45.6469	30.5938	43.4	21.5875	-1.61875	45.1125	20.3125	17.5469	26.0281	9.35	20.3344		34.2	27.5875	25.3813	27.1938	30.2875	26.2375	15.8125	30.7125	44.2844	43.525	39.2937	39.2906	37.7562	39.9438	43.7375	34.4969	21.4031	37.5656	36.1531	46.5625	53.6063	60.9406	56.6125	55.5719	53.6531
	34.3	46.1656	45.6781	30.7094	43.5969	21.5094	-1.65625	44.8594	20.6375	17.3844	26.0906	9.875	20.5656		34.3	27.5594	25.5531	27.2875	30.1062	26.1	15.9437	30.7781	44.1531	43.6937	39.15	39.2656	37.8688	39.8969	43.7625	34.5938	21.4219	37.4406	36.1406	46.5063	53.5938	61.0156	56.6312	55.5937	53.6344
	34.4	46.4375	45.7312	30.7125	43.4625	21.4594	-1.42813	44.8594	20.7719	17.4031	26.2531	9.88437	20.7937		34.4	27.5656	25.7906	27.2406	30.0781	25.95	15.9719	30.9781	44.1094	43.6687	39.225	39.2625	37.8656	39.9594	43.7812	34.6219	21.3969	37.5563	36.1375	46.4656	53.6531	61.0406	56.625	55.6312	53.5344
	34.5	46.4062	45.8437	30.7406	43.7219	21.3625	-1.29062	44.9969	20.7719	17.4656	26.3813	9.91563	20.9844		34.5	27.6219	25.8781	27.3188	30.125	25.9031	16.0187	30.875	44.1594	43.5844	39.2469	39.25	37.8188	40.0281	43.7281	34.6406	21.4281	37.4625	36.15	46.4813	53.6719	61.0187	56.8219	55.5	53.5031
	34.6	46.6219	45.7125	30.7656	43.8625	21.35	-1.24687	45.0157	20.8094	17.7281	26.4062	9.97812	20.9031		34.6	27.5125	25.9594	27.3812	30.2156	25.8687	16.0375	30.8188	44.1844	43.6375	39.2313	39.3	37.7938	39.9531	43.775	34.7406	21.4812	37.5062	36.1625	46.5063	53.6969	61.1313	56.7281	55.525	53.4406
	34.7	46.8625	45.7219	30.8938	43.7938	21.2063	-1.09375	44.9187	20.7	17.6094	26.5938	10.3094	20.8531		34.7	27.7969	26.1532	27.2688	30.2969	25.9812	15.4031	30.85	44.1313	43.5719	39.1562	39.3375	37.8063	39.8813	43.7937	34.7219	21.4344	37.4937	36.1813	46.5187	53.6594	61.0594	56.8437	55.6031	53.35
	34.8	47.0594	45.8437	30.7594	43.6656	21.0656	-0.75	45.0344	20.45	17.3594	26.7719	10.2563	20.725		34.8	27.7875	26.2781	27.3688	30.3156	26.0312	15.7844	30.8969	44.1375	43.6031	39.075	39.325	37.7281	39.8906	43.8125	34.725	21.4156	37.3594	36.1969	46.5969	53.6031	61.2156	56.7594	55.5219	53.4594
	34.9	47.0625	45.8156	30.825	43.8625	21.1844	-0.75625	44.8437	20.4281	17.275	26.5781	10.7312	20.9687		34.9	27.6844	26.4781	27.35	30.3937	26.0062	16.1688	30.8907	44.0844	43.5719	39.125	39.1625	37.775	39.8406	43.8218	34.7219	21.4625	37.4	36.1906	46.6125	53.5656	61.1312	56.6625	55.625	53.45
	35	47.2812	45.9563	30.8813	43.7812	21.1656	-0.51875	45.1781	20.3531	17.3594	26.6281	10.9375	21.1656		35	27.7125	26.6156	27.4375	30.4	25.9469	16.2031	31.1281	44.175	43.6187	39.1063	39.2063	37.7406	39.825	43.8375	34.7188	21.5062	37.5	36.2	46.5969	53.5531	61.075	56.8687	55.5687	53.4531
	35.1	47.2406	46	30.8219	43.85	21.1438	-0.290625	45.0156	20.5	17.3906	26.5406	11.425	20.9469		35.1	27.7531	26.6	27.5125	30.3656	26.0219	16.2782	31.0938	44.175	43.6469	39.0125	39.175	37.8125	39.8688	43.8469	34.7875	21.5125	37.6031	36.2031	46.6156	53.6125	61.1844	56.9437	55.6125	53.4156
	35.2	47.2313	45.8219	30.7563	43.875	21.0813	-0.184375	45.1031	21.0844	17.7688	26.6281	11.2625	21.1719		35.2	27.8188	26.7688	27.4469	30.4562	26.125	16.3625	31.1438	44.2219	43.6625	39.0875	39.1781	37.9188	39.8031	43.8625	34.75	21.4	37.5125	36.2219	46.6219	53.6063	61.2563	57.0031	55.5969	53.3969
	35.3	47.3469	45.7687	30.725	43.8344	21.0437	-0.21875	44.9688	21.075	17.5312	26.5531	11.5375	21.1812		35.3	27.875	26.95	27.4875	30.6	26.1531	16.2406	31.15	44.2156	43.7781	39.1219	39.2812	37.8969	39.8563	43.8375	34.7406	21.4437	37.4875	36.2437	46.5312	53.6062	61.2656	56.9969	55.6656	53.4375
	35.4	47.3437	45.7094	30.6594	43.8344	20.975	0.01875	45.0688	21.2406	17.5969	26.675	11.875	21.2531		35.4	27.9687	27.0469	27.6031	30.5969	26.0844	16.0656	31.0594	44.1594	43.7844	39.1313	39.2625	37.9687	39.8094	43.8656	34.6719	21.4562	37.3969	36.2437	46.5156	53.5125	61.2844	56.9125	55.5594	53.4469
	35.5	47.5594	45.5469	30.8781	44.0125	20.9125	0.15	45.1375	20.9781	17.6062	26.5719	11.9937	21.2469		35.5	28	27.125	27.5188	30.6062	26.3	16.4312	31.0938	44.2188	43.6125	39.1437	39.4375	37.9969	39.7375	43.8625	34.7593	21.4969	37.4219	36.2594	46.5781	53.5625	61.2687	56.9688	55.5562	53.4656
	35.6	47.2	45.5594	30.7312	43.7281	20.8937	0.334375	45.175	21.0125	17.7875	26.6375	12.0562	21.175		35.6	27.8469	27.1875	27.6187	30.5656	26.1625	16.4	30.9563	44.1688	43.6625	39.2406	39.4437	37.9656	39.6437	43.9156	34.7906	21.4937	37.4281	36.2656	46.6187	53.5219	61.2625	56.9969	55.7437	53.4594
	35.7	47.1812	45.425	30.775	43.9969	20.9094	0.5875	45.2687	21.35	17.825	26.7688	12.0594	21.2938		35.7	27.8937	27.2844	27.6438	30.5906	26.025	16.3687	30.9844	44.1719	43.6031	39.2469	39.4187	38.0125	39.6437	43.8969	34.8312	21.45	37.0937	36.2844	46.5469	53.5219	61.3469	56.9875	55.6281	53.4687
	35.8	47.2719	45.5469	30.9563	43.5625	20.8719	0.55	45.2781	21.55	17.6531	26.7469	11.7562	21.4469		35.8	27.7719	27.45	27.7344	30.6906	25.9781	16.475	31.0594	44.0969	43.6438	39.1906	39.4031	38.0656	39.6	43.9094	34.75	21.4625	37.3375	36.2875	46.5344	53.4937	61.2375	57.1437	55.6469	53.4375
	35.9	46.9312	45.5906	30.75	43.7781	20.8125	0.675	45.4344	21.55	17.8844	26.7344	11.8719	21.4219		35.9	27.9969	27.4219	27.7375	30.6687	25.7875	16.3813	31.0125	44.2187	43.6812	39.2	39.3875	37.95	39.6219	43.9594	34.8406	21.4625	37.3312	36.2594	46.5	53.4125	61.3219	57.2719	55.6531	53.4406
	36	46.7625	45.7406	30.7188	43.9281	20.8188	0.915625	45.475	20.8313	17.6594	26.4594	11.7687	21.4844		36	28.1343	27.4719	27.7219	30.7656	25.7406	16.3812	31.1781	44.2781	43.7125	39.2094	39.4781	38.0219	39.5969	43.9469	34.8156	21.4875	37.3281	36.2656	46.5	53.3625	61.3594	57.2406	55.6844	53.375
	36.1	46.7125	45.7469	30.8438	43.7719	20.7812	1.33125	45.4562	20.6	17.5125	26.2844	12.0094	21.525		36.1	28.0812	27.4906	27.8125	30.7094	25.7156	16.2094	31.2312	44.275	43.6094	39.125	39.4531	37.9906	39.6406	43.9031	34.9281	21.4656	37.3094	36.2594	46.5438	53.4219	61.4781	57.3187	55.6719	53.3875
	36.2	46.7156	45.725	30.6656	43.7625	20.775	1.43437	45.4938	20.9406	17.5375	26.7125	12.325	21.5812		36.2	28.1437	27.4812	27.9531	30.8563	25.5656	16.425	31.1594	44.1719	43.7	39.2563	39.4094	37.8938	39.7219	43.8406	35.0094	21.4875	37.1875	36.275	46.5844	53.4406	61.4562	57.3156	55.65	53.3344
	36.3	46.7063	45.7438	30.7656	44.0187	20.8188	1.55	45.55	20.8094	17.4281	26.5281	12.4719	21.6375		36.3	27.9406	27.4875	27.8688	30.9032	25.5656	16.5188	31.2281	44.1094	43.775	39.3125	39.4	37.8	39.6812	43.9562	35.0406	21.4875	37.2906	36.2844	46.6094	53.5219	61.425	57.3313	55.6156	53.2625
	36.4	46.7344	45.75	30.8594	44.0969	20.7594	1.74063	45.7437	20.9969	17.3156	26.6469	12.5781	21.8469		36.4	28.1062	27.5406	27.8781	30.7375	25.6562	16.5625	31.1907	44.0844	43.8593	39.3344	39.3312	37.8531	39.6812	43.8156	35.0063	21.4969	37.3062	36.3031	46.55	53.4781	61.2188	57.4031	55.6219	53.3312
	36.5	46.6625	45.8187	30.8719	44.0219	20.725	2.04375	45.6968	20.9469	17.5531	26.6781	12.5937	21.7375		36.5	28.075	27.5187	27.9437	30.7813	25.6875	16.5125	31.1281	44.2	43.8	39.3125	39.3687	37.8031	39.6406	43.7094	35.0656	21.5031	37.2406	36.3062	46.5875	53.4937	61.3406	57.3687	55.6563	53.3
	36.6	46.9562	45.7875	30.8406	43.7969	20.75	2.20625	45.6344	20.8875	17.6687	26.7312	12.8687	21.7281		36.6	27.9062	27.4031	28.0937	30.8282	25.8187	16.6031	31.2094	44.1625	43.8531	39.3062	39.4312	37.7938	39.725	43.675	35.0469	21.4875	37.2375	36.3062	46.4969	53.5938	61.4812	57.2625	55.6812	53.3625
	36.7	47.1156	45.8656	30.8594	44.05	20.7031	2.44375	45.9687	21.2656	17.5594	26.8687	12.7906	21.7813		36.7	28.0437	27.5594	27.8969	30.7344	25.7531	16.5719	31.1844	44.1125	43.7875	39.3812	39.3406	37.8313	39.7437	43.725	35.1031	21.4875	37.1312	36.3219	46.5562	53.5562	61.4531	57.275	55.6031	53.3313
	36.8	47.1656	45.7219	30.9281	44.1219	20.7344	2.59687	45.9906	20.9656	17.8	26.8469	12.6844	21.6219		36.8	27.975	27.6344	27.8625	30.6938	25.9062	16.5437	31.3094	44.0563	43.9406	39.3656	39.4344	37.8875	39.7062	43.6469	35.1375	21.5	37.1344	36.3219	46.5031	53.4906	61.4969	57.2781	55.5031	53.2562
	36.9	47.2906	45.6062	30.8656	44.1031	20.7063	2.80625	46.025	20.6719	17.7812	26.9438	13.0938	21.8625		36.9	27.9531	27.8938	27.8906	30.5937	25.7437	16.7813	31.1719	44.0875	43.8812	39.3219	39.4187	37.8781	39.7062	43.6125	35.1313	21.4937	37.1531	36.3281	46.3813	53.4563	61.4688	57.2	55.5375	53.2344
	37	47.3781	45.6375	30.9125	44.1563	20.7531	2.88437	45.9531	20.9969	17.8031	26.9219	13.3	21.8344		37	27.8031	27.9875	27.9594	30.7219	25.5375	16.8813	31.3531	44.1125	43.8969	39.3094	39.4344	37.7625	39.5781	43.6937	35.175	21.4969	36.9156	36.3312	46.4562	53.4469	61.35	57.1313	55.45	53.3375
	37.1	47.2312	45.6031	31.0125	43.9844	20.7063	3.03437	45.8719	21.2094	17.7875	27.075	13.3969	21.9063		37.1	27.6843	28.0812	27.9094	30.7688	25.5469	16.8813	31.25	44.2312	43.9375	39.325	39.4937	37.7969	39.6156	43.7	35.1625	21.4812	37.0312	36.3469	46.4281	53.5125	61.4813	57.1938	55.5562	53.2625
	37.2	47.2594	45.6313	31.0094	44.0344	20.7219	3.325	45.9813	21.3969	18.0094	27.1969	13.25	21.7188		37.2	27.5813	28.0031	27.9375	30.7563	25.6406	16.95	31.2063	44.2125	43.9469	39.3719	39.5031	37.8937	39.5781	43.6781	35.3094	21.5406	36.975	36.3469	46.4094	53.5469	61.4469	57.2281	55.5406	53.1937
	37.3	47.3	45.6125	30.8188	43.9125	20.6438	3.40625	45.9656	21.7719	18.1906	27.0875	13.2406	21.8625		37.3	27.525	27.9843	27.8906	30.6844	25.6313	16.9219	31.1906	44.2281	43.9187	39.4188	39.4344	37.9063	39.5531	43.7531	35.15	21.5062	36.8813	36.3531	46.3656	53.5219	61.5844	57.1812	55.575	53.1656
	37.4	47.0344	45.5969	30.9	44.3062	20.6406	3.56562	45.9562	21.6344	17.8313	27.1656	13.1875	21.75		37.4	27.7563	28.0344	27.8469	30.6875	25.675	16.6719	31.1719	44.2187	43.9156	39.3781	39.4906	37.9406	39.5812	43.7031	35.1469	21.525	37.0562	36.3563	46.2812	53.6	61.5094	57.225	55.6594	53.0469
	37.5	47.1531	45.7812	30.8938	44.1563	20.6594	3.32812	45.9468	21.5156	17.875	27.0344	13.2	21.9656		37.5	27.6187	28.0218	27.9344	30.5937	25.6062	16.7594	31.2375	44.2219	43.8906	39.4	39.525	38.0094	39.6344	43.7656	35.15	21.5094	36.9156	36.3687	46.2219	53.4906	61.4875	57.1875	55.5781	53.1125
	37.6	47.1563	45.7625	30.7844	44.2625	20.6438	3.29375	45.9844	21.175	17.8781	27.1594	13.2594	21.9407		37.6	27.6594	28.0781	27.9687	30.6562	25.3531	16.9625	31.2375	44.2406	43.9656	39.425	39.5687	38.025	39.6219	43.7781	35.175	21.5187	36.9344	36.3656	46.2156	53.3844	61.5281	57.2219	55.5687	53.1625
	37.7	47.175	45.7531	30.8938	44.3062	20.6625	3.33125	45.8843	21.5281	18.0813	27.0625	13.1125	21.55		37.7	27.6156	28.1469	28	30.65	25.7125	16.9094	31.2625	44.2312	43.9562	39.3906	39.4438	38.1156	39.6531	43.6687	35.2375	21.5438	36.95	36.35	46.3406	53.2937	61.25	57.2938	55.6031	53.1781
	37.8	47.3281	45.7156	30.7656	44.3219	20.6625	3.35	46.0812	21.2531	18.1719	27.2156	13.1062	21.6844		37.8	27.8156	28.3188	27.9812	30.5937	25.4937	17.0375	31.25	44.2406	43.8125	39.4562	39.4875	38.2407	39.5531	43.7156	35.2437	21.6031	36.8969	36.3531	46.4813	53.375	61.2594	57.2844	55.575	53.2187
	37.9	47.2906	45.7156	30.6438	44.1219	20.7469	3.68125	46.1312	21.1531	18.2	27.2156	13.2813	21.7062		37.9	27.7375	28.1812	27.9375	30.5687	25.5875	16.9062	31.3125	44.2375	43.8281	39.4531	39.3812	38.2281	39.4187	43.7531	35.2938	21.6344	36.7813	36.35	46.5875	53.4406	61.4344	57.2625	55.5906	53.2281
	38	47.4156	45.65	30.825	44.0531	20.7063	3.55	46.2906	21.0875	17.6938	27.1187	13.3719	21.8188		38	27.7688	28.1594	27.9281	30.4968	25.5344	17.0312	31.3469	44.2593	43.7625	39.4938	39.3563	38.1656	39.6094	43.8312	35.325	21.675	36.775	36.3563	46.5719	53.4594	61.4156	57.3	55.6219	53.1906
	38.1	47.2969	45.7344	30.8156	44.2281	20.6656	3.60938	46.0781	21.25	17.7781	27.2031	13.4625	21.4969		38.1	27.8188	28.1375	27.8938	30.6031	25.775	17.1625	31.4125	44.2375	43.8031	39.5312	39.3469	38.2719	39.6812	43.7906	35.2875	21.6313	36.8438	36.3625	46.6031	53.4531	61.3719	57.2563	55.5563	53.1875
	38.2	47.1375	45.55	30.9375	44.2437	20.5875	3.85312	46.225	20.9625	17.6438	27.1938	13.6156	21.7469		38.2	27.8094	28.1562	27.8313	30.6125	25.7593	16.95	31.475	44.3281	43.6531	39.5562	39.4375	38.2219	39.5781	43.8468	35.3281	21.6625	36.9188	36.3781	46.5844	53.4063	61.4375	57.2813	55.6312	53.2375
	38.3	46.9406	45.6875	30.9563	44.2125	20.6688	3.83438	46.275	20.8438	17.7812	26.9875	13.7719	21.6469		38.3	27.8875	28.1406	27.8906	30.5906	25.6937	17.0656	31.5156	44.3031	43.6969	39.5812	39.5125	38.0531	39.6281	43.8593	35.2812	21.6438	36.8937	36.4	46.6781	53.4375	61.3344	57.325	55.5812	53.2313
	38.4	47.0969	45.7219	30.9969	44.3031	20.6938	3.86563	46.2875	21.2406	17.7656	27.0219	13.4781	21.8875		38.4	27.9625	28.1469	27.9625	30.6219	25.6969	16.8844	31.4312	44.3531	43.7219	39.5562	39.4344	38.0969	39.6531	43.8437	35.3406	21.6375	36.8	36.3844	46.6938	53.45	61.4312	57.2594	55.5156	53.2687
	38.5	47.0938	45.775	30.9594	44.2875	20.7531	3.85312	46.3469	21.375	17.5375	26.9219	13.575	21.9156		38.5	27.8531	28.1938	27.9187	30.625	25.6406	16.9625	31.4781	44.2656	43.7468	39.4969	39.4094	38.0875	39.7406	43.7625	35.3812	21.5813	36.6875	36.3906	46.6812	53.4562	61.3719	57.2344	55.5219	53.1594
	38.6	47.2469	45.5281	31.0531	44.15	20.9594	3.88437	46.5125	21.3125	17.3813	26.9781	13.8594	22.1125		38.6	27.8531	28.225	27.8844	30.7156	25.6625	16.8625	31.3688	44.275	43.7687	39.5063	39.4406	38.1219	39.5281	43.8062	35.3312	21.5719	36.7219	36.3906	46.7094	53.4375	61.3281	57.2719	55.5188	53.1906
	38.7	47.1937	45.5437	30.9812	44.2375	20.9219	4.00312	46.4156	21.0656	17.6313	26.975	13.925	22.0437		38.7	27.9969	28.2	28.0343	30.7375	25.5469	16.8062	31.5281	44.2875	43.8094	39.5375	39.4156	38.1125	39.5812	43.8187	35.4687	21.6	36.7938	36.3969	46.6688	53.4469	61.375	57.2031	55.5063	53.1875
	38.8	47.1219	45.5938	30.9312	44.0344	20.9062	3.97812	46.3531	21.3875	17.6469	26.9312	14.3562	21.9407		38.8	27.8875	28.2938	28.1656	30.7031	25.5906	17.1156	31.5844	44.3094	43.7437	39.5719	39.5562	38.1562	39.6531	43.7593	35.3906	21.6281	36.5125	36.3875	46.7219	53.3938	61.5031	57.2281	55.5	53.1562
	38.9	46.9469	45.6156	30.8875	43.9	20.8156	4.09063	46.2594	21.5406	17.7531	27.0688	14.0875	21.7219		38.9	27.9437	28.2969	28.2	30.675	25.4031	17.2438	31.6094	44.2718	43.7281	39.5344	39.5656	38.2031	39.5968	43.8094	35.3656	21.6688	36.5906	36.4094	46.7406	53.3687	61.4594	57.2313	55.4469	53.2469
	39	47.2375	45.5281	31.0562	43.8031	20.8375	4.25625	45.9187	21.3844	17.6781	27.0719	14.0344	21.4844		39	27.8938	28.2719	28.1187	30.6344	25.4313	17.0281	31.7125	44.2812	43.7469	39.5812	39.3937	38.1406	39.6656	43.7406	35.3906	21.5375	36.5781	36.4031	46.8062	53.3625	61.3969	57.2531	55.4688	53.1469
	39.1	47.3375	45.6563	31.0125	44.2094	20.8188	4.14687	46.0219	21.3281	17.5906	27.1531	14.0031	21.6156		39.1	28.0219	28.35	28.025	30.6969	25.4063	16.925	31.7156	44.2719	43.8156	39.5781	39.425	38.0781	39.5156	43.8062	35.3594	21.6	36.5781	36.4125	46.7969	53.3312	61.4125	57.1844	55.5063	53.1969
	39.2	47.3719	45.7781	30.9906	44.25	20.8438	4.27813	46.1531	21.3031	17.7656	27.0188	13.7781	21.8875		39.2	27.9594	28.425	27.9625	30.7969	25.5531	17.1719	31.7875	44.3125	43.8219	39.6094	39.375	38.0781	39.8344	43.6406	35.4281	21.6156	36.6125	36.4031	46.8062	53.2687	61.4188	57.2938	55.5781	53.2094
	39.3	47.475	45.775	31.0562	44.2219	20.8344	4.44062	46.2969	21.1938	17.8062	27.2031	13.8969	21.95		39.3	27.9406	28.3812	27.9437	30.7406	25.475	17.0469	31.6687	44.3156	43.8031	39.5844	39.3219	38.2906	39.5531	43.6281	35.4937	21.6	36.5563	36.4031	46.7844	53.25	61.4375	57.3063	55.55	53.2531
	39.4	47.2906	45.775	31.1187	44.2031	20.875	4.62188	46.3344	20.975	17.8031	27.2844	13.7594	21.8907		39.4	28.0187	28.4062	28.2281	30.6438	25.5625	17.2656	31.6906	44.3125	43.8218	39.6531	39.3281	38.0437	39.5	43.675	35.4718	21.5969	36.4125	36.425	46.7906	53.2781	61.3031	57.3156	55.5469	53.1219
	39.5	47.3406	45.775	30.8844	43.9969	20.7875	4.64375	46.3906	20.7906	17.8219	27.1875	14.0938	21.8969		39.5	27.9437	28.3406	28.2281	30.6281	25.6375	17.475	31.6594	44.2875	43.8625	39.6063	39.3531	38.1562	39.4375	43.7406	35.4219	21.6094	36.6156	36.4375	46.7938	53.3	61.35	57.2406	55.5531	53.1375
	39.6	47.3594	45.95	30.7437	44.1156	20.8344	4.75625	46.4594	21.2625	17.7469	27.175	14.175	21.9688		39.6	27.95	28.3656	28.225	30.6406	25.375	17.6125	31.8312	44.2656	43.8187	39.6938	39.4219	38.35	39.5562	43.8687	35.4781	21.6625	36.6219	36.4344	46.8062	53.4031	61.2844	57.2875	55.5375	53.1281
	39.7	47.2031	45.9188	30.9062	44.2437	20.8125	4.75312	46.4719	21.3344	17.6906	27.2344	13.8562	21.9625		39.7	28.1156	28.3781	28.225	30.7125	25.1813	17.5688	31.8031	44.3812	43.8625	39.675	39.4719	38.3438	39.5812	43.725	35.4875	21.6688	36.5687	36.4406	46.7594	53.4469	61.35	57.25	55.5187	53.1469
	39.8	47.1781	45.9063	30.9656	43.7531	20.8094	4.7625	46.4187	21.3125	17.6844	27.4812	13.7906	21.9625		39.8	28.1781	28.4375	28.1093	30.8375	25.2563	17.2094	31.7531	44.3906	43.8281	39.6656	39.4562	38.3719	39.6344	43.7375	35.5219	21.65	36.5469	36.4375	46.6812	53.3656	61.325	57.3031	55.5406	53.0938
	39.9	47.0375	45.7469	31.0813	44.1187	20.8156	4.79375	46.55	21.1656	17.825	27.4344	14.2406	21.9156		39.9	28.1594	28.3844	28.2219	30.7688	25.1813	17.2	31.8344	44.3593	43.8531	39.6813	39.4625	38.2813	39.6219	43.7562	35.5813	21.6094	36.4156	36.4344	46.675	53.325	61.3625	57.2625	55.5937	53.1
	40	47.2562	45.775	31.2406	44.3687	20.8875	4.70625	46.4469	21.1375	18.0406	27.4625	14.3469	21.8656		40	28.3	28.1875	28.1344	30.5156	25.6031	17.1656	31.7156	44.325	43.9062	39.7437	39.3687	38.5156	39.4875	43.8062	35.5687	21.6125	36.3594	36.4469	46.6	53.3406	61.4594	57.25	55.5375	53.1
	40.1	47.2875	45.8312	31.2531	44.4312	20.8406	4.53125	46.3406	20.9125	18.2563	27.4	14.2781	21.8812		40.1	28.3	28.1781	28.1562	30.5031	25.5156	17.225	31.6781	44.4313	43.9218	39.6969	39.2812	38.4531	39.4562	43.7187	35.5469	21.6031	36.4219	36.4562	46.5375	53.2937	61.4969	57.225	55.6062	53.0906
	40.2	47.2719	45.7437	31.0469	44.1406	20.8656	4.65313	46.3437	20.9719	18.0094	27.4	14.2281	21.725		40.2	28.2688	28.3562	27.9562	30.4094	25.35	17.3469	31.8375	44.4	43.9031	39.675	39.2531	38.4781	39.6375	43.8437	35.6062	21.6313	36.4562	36.4687	46.4562	53.2437	61.3687	57.2344	55.6344	53.0812
	40.3	47.2781	45.6219	31.0813	44.3156	20.9375	4.74688	46.4312	20.9625	18.0844	27.525	14.3563	21.55		40.3	28.1906	28.3906	27.8969	30.4188	25.5469	17.2156	31.6593	44.3594	43.7687	39.725	39.3937	38.5844	39.6219	43.8906	35.5406	21.6469	36.475	36.4719	46.35	53.275	61.5125	57.325	55.6875	53.0625
	40.4	47.3344	45.6938	30.9844	44.275	20.925	4.62188	46.5969	20.8594	17.9469	27.6562	14.3938	21.6937		40.4	28.3531	28.3719	28.0281	30.5781	25.65	17.3156	31.8062	44.4062	43.8593	39.7375	39.325	38.6156	39.6781	43.8843	35.6156	21.6406	36.55	36.4719	46.3031	53.0312	61.4469	57.2	55.6969	53.0938
	40.5	47.5031	45.8313	30.8719	44.1187	20.9562	4.75625	46.4625	21.35	18.2031	27.3594	14.5344	21.5906		40.5	28.325	28.4156	28.2531	30.5844	25.4406	17.0719	31.8062	44.4219	43.85	39.7281	39.2531	38.55	39.5562	43.8781	35.6562	21.6281	36.3594	36.4719	46.375	52.8344	61.3969	57.1875	55.7188	53.1094
	40.6	47.4937	45.8375	30.9531	44.5938	20.9969	4.67812	46.4625	21.3031	18.0656	27.425	14.9063	21.575		40.6	28.1562	28.3187	28.3125	30.5687	25.6781	16.9781	31.7969	44.4594	43.8969	39.7375	39.3344	38.4594	39.5312	43.8187	35.6562	21.5719	36.3875	36.4656	46.3937	53.025	61.3594	57.2406	55.7375	53.0406
	40.7	47.2906	45.825	31.1656	44.7125	21.0344	4.71875	46.5875	21.1687	18.2156	27.3406	14.9906	21.2437		40.7	28.2031	28.375	28.3031	30.5844	25.6656	17.3812	31.8281	44.4406	43.9187	39.7187	39.2594	38.4125	39.65	43.8875	35.6781	21.5875	36.3062	36.4781	46.4062	53.0219	61.2375	57.3281	55.6906	53.0875
	40.8	47.2219	45.7938	31.1031	44.7812	21	4.78437	46.5969	21.3281	18.0594	27.3344	14.6438	21.375		40.8	28.1813	28.4469	28.2188	30.5062	25.8562	17.2281	31.8219	44.4406	43.95	39.7437	39.3187	38.5	39.4438	43.9187	35.8375	21.6125	36.2844	36.4875	46.3625	53	61.2469	57.3156	55.7063	53.1375
	40.9	47.2656	45.6875	31.1344	44.9063	20.9656	4.9125	46.5469	21.5063	18.1844	27.4844	15.0187	21.5687		40.9	28.2156	28.4062	28.3438	30.4625	25.975	17.1781	31.8781	44.3937	43.9312	39.8438	39.3375	38.5844	39.6219	43.9625	35.7656	21.5969	36.3062	36.4875	46.55	53.0187	61.2125	57.3437	55.6187	53.1437
	41	47.3062	45.6563	31.0437	44.9	21.075	5.00625	46.5438	21.5063	18.2531	27.575	15.1625	21.675		41	28.0812	28.2719	28.1656	30.3407	25.3188	17.2531	31.7937	44.3437	43.9437	39.7938	39.2656	38.6594	39.5875	43.9062	35.8	21.6375	36.3187	36.5	46.5219	52.9906	61.3563	57.3594	55.7031	53.1313
	41.1	47.2469	45.7219	31.0531	44.8281	21.0094	4.9875	46.5406	21.025	18.3656	27.6781	14.8875	21.5812		41.1	28.025	28.3594	28.1844	30.3438	25.675	17.1812	31.8844	44.425	43.9375	39.6812	39.3437	38.7094	39.5875	43.7969	35.8063	21.6531	36.4062	36.5	46.4656	52.8875	61.3937	57.1938	55.7344	53.0469
	41.2	47.3062	45.6625	31.075	45.0313	20.9125	5.11562	46.575	21.6125	18.1406	27.7063	15.3094	21.55		41.2	28.2938	28.3719	28.3375	30.4281	25.35	17.2688	31.7906	44.4062	43.9844	39.6781	39.3094	38.7281	39.4969	43.7594	35.8469	21.6375	36.4531	36.5094	46.4062	53.0031	61.4188	57.2563	55.7031	53.0688
	41.3	47.2969	45.4719	31.2188	45.025	20.9	5.14687	46.6094	21.2406	18.2031	27.8594	15.3781	21.775		41.3	28.3281	28.2688	28.3844	30.3563	25.3062	17.2406	31.8062	44.3468	43.9937	39.6594	39.3	38.5906	39.525	43.7781	35.9031	21.6313	36.6562	36.5187	46.4	52.9344	61.3875	57.2344	55.6312	53.175
	41.4	47.2406	44.4719	31.1156	45.0156	20.9094	5.2	46.575	21.9562	18.3094	28.1094	15.5125	21.9469		41.4	28.3156	28.2344	28.3719	30.5343	25.1469	17.4594	31.8219	44.4625	44.0719	39.6906	39.2438	38.6063	39.4875	43.8031	35.9469	21.6281	36.5594	36.5031	46.4594	52.9375	61.4313	57.1844	55.6187	53.0938
	41.5	47.3187	42.6625	31.1313	44.75	20.8938	5.33437	46.5094	21.8062	18.4812	28.1875	15.4844	21.875		41.5	28.1531	28.3344	28.3687	30.525	25.325	17.4969	31.8406	44.425	44.05	39.6063	39.2406	38.7032	39.4187	43.8812	35.9781	21.6625	36.5906	36.5187	46.4281	52.8781	61.5406	57.1656	55.6594	53.1031
	41.6	47.3094	41.6844	31.1812	44.7781	20.85	5.35938	46.4031	21.4469	18.2812	28.0906	15.2656	21.9594		41.6	28.1625	28.2875	28.4125	30.5187	25.2281	17.5187	31.7719	44.4156	44.0406	39.7188	39.25	38.6313	39.5094	43.8343	36	21.6625	36.6469	36.5344	46.35	52.7625	61.4625	57.1813	55.6312	53.1125
	41.7	47.3219	41.9594	31.0719	44.9594	20.9094	5.22813	46.3312	21.5719	18.2344	27.9781	15.0906	21.8188		41.7	27.9656	28.2688	28.4406	30.5969	24.8719	17.2688	31.8406	44.3281	44.0406	39.7219	39.3031	38.6281	39.3781	43.8625	35.9844	21.6344	36.5656	36.5125	46.3875	52.85	61.2469	57.175	55.5562	53.15
	41.8	47.2406	41.9313	31.1313	44.9375	20.9125	5.37812	46.4531	21.575	18.0594	27.9719	15.2	21.8563		41.8	27.7313	28.2469	28.4594	30.5562	25.2781	17.5969	31.7937	44.2687	44.0406	39.725	39.2812	38.5	39.4406	43.875	36.075	21.5281	36.6813	36.5219	46.4281	52.9281	61.2687	57.2594	55.5031	53.1031
	41.9	47.3656	42.775	31.3219	44.8719	20.9375	5.32812	46.2344	21.7	17.95	27.8594	15.6	21.9094		41.9	28.0312	28.2	28.3313	30.4594	25.3969	17.4969	31.875	44.3031	44.05	39.7594	39.3344	38.5969	39.3875	43.8719	36.0438	21.5562	36.6594	36.5406	46.4375	52.8156	61.1594	57.175	55.5188	53.1063
	42	47.3437	43.2875	31.2625	44.925	20.8969	5.43438	46.35	21.675	18.0656	28.0375	15.4719	21.9625		42	28.0219	28.0937	28.2719	30.3344	25.3469	17.6562	31.775	44.4062	43.9344	39.7937	39.3094	38.6375	39.4375	43.8625	36.0875	21.6219	36.7563	36.5531	46.475	52.825	61.1688	57.1031	55.4406	53.0406
	42.1	47.2781	43.5562	31.2094	44.9625	20.9187	5.38438	46.45	21.6125	18.1812	28.1313	15.3844	22.0125		42.1	28.0156	28.2188	28.3313	30.4437	25.1813	17.7375	31.7937	44.525	44.0375	39.775	39.2656	38.5812	39.2969	43.8562	36.1438	21.6594	36.7094	36.5531	46.4562	52.7937	61.1344	57.1281	55.4625	53.025
	42.2	47.1875	43.5094	31.2937	44.9656	20.9469	5.35625	46.4875	21.2625	18.2875	28.1125	15.4312	22.1031		42.2	27.9812	28.2188	28.3219	30.4781	25.2531	17.4844	31.7937	44.4938	43.9687	39.8062	39.2719	38.6688	39.2437	43.8125	36.1063	21.6188	36.6844	36.5406	46.4906	52.7812	61.1094	57.1375	55.45	52.9625
	42.3	46.9969	43.6063	31.2344	44.85	20.9375	5.37812	46.5156	21.2344	18.1875	28.0625	15.6219	22.3031		42.3	28.1062	28.1844	28.3594	30.4969	25.2844	17.6219	31.7844	44.5125	44.0875	39.7812	39.3531	38.7156	39.2313	43.8062	36.1407	21.5688	36.7375	36.575	46.475	52.7844	61.1781	57.0906	55.5	52.825
	42.4	46.8906	43.4875	31.3313	44.8781	20.9906	5.475	46.6219	21.1156	18.2625	28.2344	15.6406	22.3469		42.4	28.0968	28.1875	28.3813	30.5656	25.1969	17.6062	31.8469	44.5031	44.1094	39.7969	39.3969	38.6531	39.3375	43.7781	36.2094	21.6344	36.7375	36.5344	46.4469	52.6781	61.0719	57.05	55.4563	52.8781
	42.5	46.7375	44.1375	31.3594	44.8125	20.9562	5.39375	46.6156	21.0312	18.2063	28.3	15.6156	22.2187		42.5	28.1969	28.2406	28.3156	30.6562	25.275	17.55	31.9125	44.45	44.1469	39.7281	39.4062	38.75	39.2156	43.825	36.275	21.6375	36.725	36.5562	46.4219	52.7062	61.1344	56.9062	55.3937	52.85
	42.6	46.9562	43.9406	31.2531	44.9375	20.9937	5.45937	46.7562	21.2344	18.2	28.1062	15.4219	22.3		42.6	28.2781	28.275	28.3188	30.7188	25.1594	17.5094	31.8125	44.4563	44.0938	39.725	39.3656	38.7	39.2812	43.675	36.2344	21.625	36.6844	36.5656	46.45	52.7344	61.0906	56.8625	55.3375	52.9281
	42.7	46.9281	44.3937	31.2375	44.9219	21.0094	5.47187	46.825	21.3781	18.3594	27.9625	15.7219	22.1313		42.7	28.1562	28.35	28.2844	30.6375	25.2562	17.8	31.7594	44.4532	44.0844	39.6968	39.3469	38.7781	39.2063	43.6594	36.2625	21.6281	36.5125	36.5625	46.4844	52.5844	61.1031	56.95	55.3375	52.8844
	42.8	47.2187	44.2219	31.3125	45.0281	20.9937	5.55312	46.8062	21.3625	18.4531	27.95	15.7219	22.2281		42.8	28.1781	28.2875	28.25	30.6875	25.4031	17.5906	31.7812	44.4406	44.1156	39.6688	39.3406	38.8938	39.2906	43.725	36.2656	21.6406	36.6	36.5594	46.4125	52.6688	61.0719	56.925	55.3656	52.9187
	42.9	47.0656	44.875	31.2812	44.7031	21.0094	5.60625	46.925	21.3344	18.1281	28.0844	15.8969	22.2563		42.9	28.0812	28.3719	28.0906	30.625	25.2469	17.8188	31.7469	44.475	44.0656	39.7437	39.3531	38.8156	39.3031	43.7656	36.2781	21.6688	36.6375	36.5688	46.4344	52.5938	61.0969	56.9719	55.3687	52.9
	43	46.9656	45.3375	31.3156	44.7563	20.9687	5.68438	46.8219	21.1469	18.1875	27.9969	15.8406	22.2437		43	28.2625	28.4531	28.0937	30.6562	25.2594	17.6781	31.65	44.4	44.1531	39.7375	39.325	38.8281	39.3437	43.6969	36.1906	21.6906	36.7094	36.575	46.4156	52.5594	60.9656	56.8781	55.2125	52.8625
	43.1	47.0875	44.5406	31.4	44.9719	20.9844	5.72187	46.7	21.7563	18.1406	27.95	15.8719	22.2937		43.1	28.1468	28.4375	28.125	30.6656	25.2906	17.7281	31.6813	44.3969	44.1188	39.7531	39.3625	38.8032	39.35	43.7406	36.1875	21.6875	36.6781	36.5875	46.3813	52.5313	61.1063	56.8719	55.3781	52.85
	43.2	47.2031	42.9531	31.275	44.9094	20.9812	5.74688	46.875	21.4312	18.0094	27.8813	16.2281	22.1156		43.2	28.2938	28.4812	28.2344	30.6156	25.0437	17.9	31.5875	44.4125	44.0875	39.6531	39.3781	38.7407	39.2094	43.7125	36.2812	21.7063	36.6562	36.5875	46.4219	52.4344	61.0531	56.8187	55.25	52.8406
	43.3	47.0781	42.4406	31.2937	45.0125	21.0062	5.78437	46.8687	21.4187	18.3531	28.2563	15.9313	22.1437		43.3	28.2969	28.4375	28.2313	30.6062	25.0219	17.8031	31.5438	44.4188	44.1281	39.7281	39.2563	38.6969	39.2469	43.7063	36.3063	21.725	36.7188	36.5781	46.4312	52.4844	61.0844	56.8094	55.2563	52.825
	43.4	47.0906	42.3188	31.4156	44.8844	21.0156	5.80625	46.8375	21.5	18.4875	28.25	15.8094	22.2688		43.4	28.2969	28.4187	28.2782	30.5906	25.1156	17.8969	31.6031	44.3531	44.075	39.6844	39.2781	38.6813	39.1125	43.8218	36.3469	21.725	36.6469	36.5781	46.4531	52.3938	60.9156	56.7844	55.2812	52.8031
	43.5	47.1688	42.2219	31.425	44.8	21.0281	5.7875	46.8406	21.1344	18.725	28.3156	16.1187	22.2594		43.5	28.0687	28.4031	28.2844	30.725	24.9281	17.7719	31.7	44.375	44.1688	39.7125	39.2719	38.6906	39.1469	43.8187	36.2875	21.725	36.6625	36.5875	46.4344	52.4531	60.9187	56.7563	55.2125	52.8125
	43.6	47.1125	42.2719	31.5031	44.7625	21.0437	5.94375	46.95	20.7531	18.9688	28.4344	15.7844	22.2719		43.6	27.9718	28.4312	28.3375	30.825	24.9063	17.8813	31.7781	44.375	44.1437	39.7437	39.2719	38.7156	39.1875	43.8156	36.3406	21.7125	36.6938	36.5875	46.425	52.4219	60.8656	56.725	55.1531	52.8687
	43.7	47.0156	42.2938	31.3531	44.9281	21.1	5.9625	46.8312	20.9563	18.8687	28.0844	15.9969	22.1719		43.7	28.2125	28.4562	28.275	30.8313	25.1531	17.9281	31.8031	44.4594	44.1594	39.725	39.2188	38.9312	39.2094	43.7875	36.4031	21.7531	36.7594	36.5812	46.4625	52.4812	60.8219	56.7656	55.2125	52.7562
	43.8	46.8125	42.2969	31.3656	45.0031	21.1594	5.8875	46.6719	21.2156	18.7812	27.8719	15.8844	22.3969		43.8	28.1469	28.4594	28.3906	30.8313	25.1062	17.8531	31.7812	44.425	44.1656	39.7062	39.2531	38.7063	39.2	43.7844	36.3438	21.75	36.8031	36.5906	46.45	52.4937	60.9375	56.7937	55.2375	52.7969
	43.9	46.8875	42.2062	31.3844	45.0438	21.1187	6.03437	46.8437	21.375	18.7781	27.8969	16.025	22.4219		43.9	28.0937	28.5062	28.3594	30.8625	24.8625	18.0406	31.7156	44.3125	44.15	39.7781	39.2844	38.7438	39.1594	43.7938	36.3656	21.7656	36.8406	36.5844	46.4656	52.5219	61.05	56.7687	55.2969	52.775
	44	46.8656	42.2094	31.2594	45.0906	21.125	6.10313	46.9719	21.7344	18.8031	28.0844	16.1062	22.5875		44	28.2531	28.425	28.4156	30.6719	25.0563	18.1531	31.75	44.4187	44.075	39.825	39.225	38.775	39.1125	43.7781	36.3312	21.7563	36.7719	36.5844	46.4562	52.4406	61.0219	56.6375	55.2594	52.7969
	44.1	46.8813	42.2813	31.3875	45.25	21.0375	6.15	46.8719	21.5531	18.8	28.2437	16.2625	22.4781		44.1	28.225	28.5406	28.4437	30.7469	24.9438	17.8938	31.8125	44.4344	44.0688	39.825	39.3344	38.775	39.1688	43.8375	36.3719	21.7625	36.85	36.5812	46.4156	52.5	61.0281	56.6844	55.1875	52.8094
	44.2	47.0906	42.3563	31.2063	45.1188	21.1313	6.09687	46.7844	21.2281	18.7594	28.2656	15.8312	22.3875		44.2	28.2594	28.5343	28.3313	30.6781	24.9657	17.7969	31.7812	44.4469	44.1063	39.8688	39.2562	38.6875	39.1	43.8344	36.4562	21.7844	36.7688	36.5812	46.3937	52.4188	60.9437	56.6	55.2219	52.7937
	44.3	47.125	42.3531	31.3906	45.2219	21.2031	6.15937	46.95	21.4438	18.95	28.3344	15.875	22.4188		44.3	28.2156	28.4969	28.3781	30.5812	25.025	18.2031	31.7594	44.4344	44.1531	39.8281	39.2562	38.8125	39.1437	43.7906	36.4562	21.7844	36.7063	36.6	46.3937	52.3375	60.9531	56.4562	55.1125	52.8094
	44.4	47.2062	42.5156	31.3094	45.1469	21.1906	6.34063	46.9906	21.6781	19.0312	28.4125	16.175	22.4375		44.4	28.1906	28.4406	28.3688	30.6312	25.1187	18.0906	31.7156	44.4281	44.0406	39.7906	39.2719	38.6813	39.1	43.5562	36.4656	21.7875	36.6813	36.6094	46.4781	52.3656	60.9719	56.5031	55.1812	52.85
	44.5	47.1312	42.3812	31.4531	45.3625	21.2	6.29688	47.0719	21.7906	18.9688	28.4844	16.2844	22.3844		44.5	28.1375	28.5719	28.4187	30.5	25.05	17.8781	31.6906	44.425	44.0969	39.8094	39.2156	38.7469	39.0156	43.6	36.4031	21.7812	36.7625	36.6063	46.5031	52.3031	60.9844	56.4469	55.1344	52.8031
	44.6	47.0438	42.2781	31.3531	45.6094	21.2312	6.19375	47.1094	21.7844	18.9	28.4844	16.1156	22.4656		44.6	28.25	28.5	28.3969	30.6218	24.95	18.0438	31.4938	44.4406	44.1656	39.7531	39.1344	38.6594	39.1063	43.7344	36.4531	21.8219	36.7125	36.5812	46.5562	52.3156	60.9375	56.3813	55.1469	52.7531
	44.7	47.1094	42.3437	31.3094	45.7063	21.2875	6.30625	46.8812	21.4594	18.8781	28.6531	16.0375	22.6187		44.7	28.1469	28.3281	28.4594	30.6031	24.5406	17.8938	31.4438	44.4062	44.2	39.8344	39.0938	38.6688	39.0031	43.6937	36.5156	21.8281	36.7094	36.6094	46.4781	52.3125	60.9656	56.3781	55.1562	52.6906
	44.8	47.0031	42.5344	31.3813	45.7125	21.2594	6.34063	46.9656	21.6687	18.9594	28.8406	16.0094	22.625		44.8	28.1812	28.3719	28.2813	30.6906	24.8219	17.9844	31.6781	44.2906	44.1594	39.8062	39.1406	38.7375	39.0281	43.6656	36.4875	21.8188	36.7594	36.6063	46.4906	52.3	61	56.4844	55.2344	52.7156
	44.9	47.0125	42.475	31.375	45.5031	21.2625	6.275	46.8969	21.6687	18.9906	28.8344	16.2594	22.5187		44.9	28.2313	28.4843	28.3781	30.6437	24.9156	18.1406	31.8312	44.4125	44.2031	39.8563	39.0531	38.7	38.9	43.775	36.5625	21.7531	36.6938	36.6219	46.4906	52.3313	60.8969	56.4406	55.2031	52.7156
	45	47.1281	42.6187	31.2875	45.4625	21.2906	6.325	46.9031	21.4781	18.9688	28.7688	15.9844	22.4906		45	28.1437	28.4031	28.3219	30.575	24.8594	18.0906	31.9688	44.5157	44.075	39.8375	39.0875	38.6594	38.8344	43.6906	36.5813	21.7	36.775	36.625	46.5406	52.3563	60.9844	56.525	55.1469	52.7437
	45.1	47.1	42.7562	31.4094	45.5375	21.3375	6.3875	46.8219	21.1406	18.8937	28.7625	15.9938	22.2094		45.1	28.1906	28.4437	28.2563	30.6875	25.15	17.8781	32.0156	44.475	44.0969	39.8813	39.15	38.5594	38.9344	43.5813	36.5656	21.7719	36.8594	36.625	46.5156	52.3375	60.875	56.5031	55.175	52.725
	45.2	47.0875	42.9625	31.3188	45.6062	21.2781	6.44375	46.8375	21.3688	19.0594	28.6687	15.8094	22.0937		45.2	28.1875	28.4094	28.2469	30.6719	25.2875	18.2656	32	44.4438	44.1313	39.9031	39.075	38.6844	38.9781	43.6844	36.5906	21.8062	36.7219	36.65	46.55	52.3125	60.7531	56.5438	55.0875	52.7656
	45.3	47.0812	43.075	31.3531	45.4875	21.3281	6.42188	46.8344	21.8812	19.0344	28.8094	15.675	22.3438		45.3	28.2375	28.4781	28.2844	30.7063	25.3563	18.2094	32.1968	44.4531	44.0969	39.8781	39.1344	38.7063	38.8813	43.6594	36.5782	21.825	36.7969	36.6313	46.5125	52.3	60.7875	56.4813	54.9844	52.8
	45.4	46.8562	43.0156	31.3156	45.2375	21.3031	6.4	46.8531	21.8563	18.9594	28.8719	16.0031	22.4594		45.4	28.1375	28.3125	28.425	30.6062	25.2812	18.1844	32.1906	44.4563	44.15	39.9188	39.0906	38.5469	38.9282	43.6594	36.5938	21.8375	36.8125	36.6531	46.4562	52.2937	60.8437	56.4219	55.0469	52.7
	45.5	46.7312	42.925	31.475	45.2844	21.3031	6.52187	47.0469	21.9062	18.6687	28.9187	16.1906	22.4469		45.5	28.2313	28.4031	28.4344	30.6562	25.1156	18.0688	32.075	44.4625	44.0969	39.9282	39.1063	38.4438	38.9094	43.6125	36.5688	21.7188	36.8625	36.6719	46.4813	52.3531	60.9125	56.4375	54.925	52.7375
	45.6	46.7062	43.0438	31.4062	45.1625	21.2812	6.61875	47.0938	21.6375	18.6	28.9875	16.3062	22.475		45.6	28.1437	28.3344	28.4031	30.6375	25.3313	18.0281	32.1968	44.5344	44.1031	39.9344	39.0718	38.5938	38.8438	43.6906	36.6344	21.7844	36.8656	36.6781	46.5063	52.3406	60.5938	56.4719	54.9563	52.7469
	45.7	46.8781	43.2563	31.325	45.3375	21.3406	6.55312	46.9531	21.4531	18.7031	28.9906	16.2031	22.4281		45.7	27.9875	28.4062	28.3938	30.7281	25.1469	18.2406	32.2562	44.5469	43.9719	39.9719	39.0844	38.6875	38.8719	43.7687	36.6594	21.7937	36.8125	36.6875	46.5312	52.275	60.5156	56.4688	54.9813	52.7781
	45.8	46.7844	43.1594	31.3938	45.3156	21.3	6.54688	46.9437	21.4594	18.7719	28.9719	16.4125	22.4344		45.8	28.0656	28.4344	28.4062	30.7094	25.2188	18.2844	32.1281	44.5032	44.0875	39.9532	39.1281	38.7344	38.8094	43.7312	36.6844	21.7437	36.7656	36.6844	46.6313	52.275	60.5969	56.4406	54.8531	52.7375
	45.9	46.7656	43.2437	31.4156	45.4531	21.2906	6.66563	46.9468	21.3844	18.75	28.9625	16.4781	22.4719		45.9	28.1594	28.5094	28.4469	30.6781	24.7937	18.2063	31.9844	44.4344	44.1875	39.9375	39.15	38.6844	38.8813	43.75	36.6907	21.7719	36.7438	36.6969	46.5312	52.3063	60.4813	56.425	54.95	52.7344
	46	46.8812	43.1281	31.3969	45.2719	21.3406	6.725	46.8156	21.5031	18.7594	28.9187	16.4844	22.0063		46	28.0406	28.5375	28.4125	30.7063	25.0906	18.0062	32.1281	44.4469	44.1656	39.8437	39.0312	38.65	38.9375	43.7094	36.6813	21.7937	36.7563	36.6875	46.4469	52.2812	60.6219	56.3469	54.9125	52.6688
	46.1	46.9031	43.1437	31.2781	45.1531	21.3875	6.85938	46.9843	21.7875	18.7063	28.9094	16.6312	21.5844		46.1	28.0875	28.5031	28.4062	30.6625	25.0094	18.3844	32.0344	44.5	44.0344	39.8469	39.1	38.7281	38.9906	43.6344	36.7125	21.775	36.7688	36.6906	46.5625	52.2687	60.6031	56.2938	54.925	52.6844
	46.2	46.85	43.0063	31.2688	45.1812	21.3813	6.74375	47.1031	21.725	18.775	28.9031	16.5062	21.6562		46.2	28.1468	28.4968	28.4531	30.6156	25.2	18.4125	32.1156	44.5719	44.025	39.9063	39.1281	38.6844	38.9031	43.6313	36.7156	21.7937	36.7531	36.6844	46.5125	52.0312	60.4063	56.3656	54.9406	52.6531
	46.3	46.9188	43.175	31.3438	45.2406	21.3281	6.8625	46.9437	21.8062	18.8469	29.075	16.525	22.0406		46.3	28.0719	28.4375	28.4531	30.6219	25.1406	18.4	32.1937	44.5313	44.1594	39.8688	39.175	38.6938	39.0625	43.575	36.7594	21.7688	36.7969	36.6969	46.5094	51.8344	60.2063	56.4469	55.0062	52.6687
	46.4	46.9344	43.2188	31.3844	45.1375	21.2906	6.89375	47.0875	22.0219	19	29.1156	16.5844	22.1969		46.4	28.0812	28.3063	28.4469	30.6093	25.1719	18.7313	32.1781	44.4813	44.1188	40.0156	39.2531	38.6563	38.9406	43.6407	36.7125	21.8188	36.7594	36.6906	46.5844	51.8875	60.2281	56.3906	55.0344	52.6469
	46.5	46.8562	43.2375	31.3125	45.2813	21.3125	6.74062	46.9531	22.0344	18.8219	29.1406	16.6469	22.4031		46.5	28.2969	28.3313	28.4406	30.7281	25.1563	18.3219	32.2437	44.5375	44.025	39.9094	39.2406	38.6563	38.8344	43.5781	36.7281	21.7844	36.8344	36.6844	46.6656	51.9219	60.125	56.4281	54.975	52.6094
	46.6	46.6656	43.4031	31.3625	45.2844	21.3656	6.7125	47.0406	22.3062	18.8	29.5094	16.2656	22.3157		46.6	28.1031	28.3219	28.575	30.6938	25.2719	18.4719	32.2625	44.5	43.95	39.8938	39.3062	38.6406	38.8844	43.5375	36.7844	21.7688	36.7844	36.6938	46.6594	52.025	60.2844	56.2719	54.9875	52.5687
	46.7	46.75	43.2656	31.4125	45.1813	21.3531	6.60313	47.1625	22.3125	18.9719	29.4844	16.2812	22.2406		46.7	28.2906	28.3125	28.4875	30.7438	25.3656	18.6438	32.3062	44.4	44.0094	39.8907	39.3437	38.4406	38.9406	43.5781	36.7781	21.7656	36.725	36.7	46.6844	52.2469	60.1625	56.1469	54.9688	52.5313
	46.8	46.7125	43.4187	31.3625	45.1094	21.4188	6.71875	47.125	22.1281	19.0156	29.5562	16.5594	22.5656		46.8	28.2281	28.4406	28.625	30.6656	25.375	18.5156	32.125	44.5	44.025	39.9188	39.2156	38.5469	38.875	43.6469	36.7656	21.7563	36.7031	36.6781	46.6812	52.3219	60.1469	56.1938	54.9563	52.5125
	46.9	46.8844	43.3812	31.3656	45.2406	21.4188	6.825	47.1438	21.6344	18.8219	29.5063	16.7937	22.4406		46.9	28.2188	28.5063	28.5	30.6594	25.3875	18.7594	32.0875	44.4156	44.0406	39.9281	39.2125	38.5531	38.8344	43.6281	36.7313	21.7688	36.7938	36.675	46.7188	52.3062	60.1094	56.2656	54.9875	52.4937
	47	46.9563	43.325	31.45	45.3438	21.4563	6.8875	47.2219	21.6812	18.5531	29.5875	16.5844	22.5375		47	28.3344	28.5937	28.5906	30.7469	25.3656	18.6625	32.0531	44.3844	44.0938	39.9531	39.2812	38.5125	38.7469	43.5406	36.8281	21.7656	36.7969	36.6938	46.75	52.3281	60.1531	56.1938	54.9531	52.5625
	47.1	46.8031	43.3031	31.6156	45.2437	21.4406	6.93438	47.225	21.6875	18.7969	29.6313	16.6344	22.8062		47.1	28.2969	28.5343	28.6063	30.6813	25.5281	18.7875	32.0781	44.4688	44.1313	39.9094	39.2844	38.55	38.8875	43.6219	36.8125	21.7406	36.8313	36.6938	46.6969	52.3094	60.1281	56.1531	54.95	52.525
	47.2	46.8125	43.3469	31.4344	45.2375	21.4938	7.425	47.2437	21.8687	18.7375	29.5781	16.4938	22.7969		47.2	28.3407	28.6031	28.6125	30.8031	25.6281	18.2344	32.0969	44.4312	44.1563	39.9594	39.2437	38.5906	38.7188	43.6656	36.8094	21.7688	36.7344	36.7125	46.6875	52.2906	60.1531	56.1187	54.9406	52.5562
	47.3	46.9781	43.3969	31.5063	45.3	21.4563	7.61562	47.1407	21.9937	18.8531	29.5938	16.3469	22.8281		47.3	28.35	28.5656	28.6688	30.7031	25.6313	18.675	32.1781	44.4844	44.1812	39.9938	39.2437	38.5625	38.5219	43.6438	36.8438	21.7312	36.8344	36.725	46.6875	52.25	60.1625	56.1781	54.8906	52.5969
	47.4	46.8813	43.2781	31.4219	45.2687	21.4	7.69375	47.1781	22.0625	18.6437	29.5281	16.2719	22.7344		47.4	28.2219	28.5687	28.625	30.6343	25.7625	18.6844	32.175	44.55	44.125	39.9282	39.2844	38.4969	38.4281	43.8	36.7406	21.7156	36.7906	36.7219	46.7594	52.2187	60.1094	56.2688	54.9	52.5594
	47.5	46.9469	43.3187	31.4344	45.4937	21.425	8.1625	47.2	22.15	18.7219	29.5	16.5688	22.725		47.5	28.2438	28.5562	28.65	30.5594	25.6969	18.6219	32.0781	44.475	44.0406	39.9344	39.2563	38.5156	38.525	43.7344	36.7562	21.7375	36.8375	36.7031	46.6656	52.2219	60.1125	56.0656	54.8875	52.6
	47.6	46.925	43.3188	31.425	45.6969	21.425	8.15938	47.2844	22.0094	18.7344	29.6531	16.4094	22.6219		47.6	28.2719	28.5187	28.7657	30.6406	25.5906	18.5094	32.1718	44.5125	44.0469	39.9719	39.2687	38.5844	38.4656	43.7437	36.8031	21.7406	36.7969	36.7156	46.6125	52.2625	60.1281	56.1688	54.7375	52.5906
	47.7	46.8219	43.2312	31.4375	45.7031	21.5562	8.35625	47.1313	22.325	18.9406	29.7594	16.0469	22.8719		47.7	28.2219	28.3219	28.7281	30.6812	25.6656	18.6188	31.9969	44.4781	44.0469	39.95	39.2	38.5187	38.5187	43.7937	36.775	21.7781	36.7156	36.7344	46.7094	52.2281	60.1844	56.2438	54.7344	52.5875
	47.8	46.875	43.2844	31.325	45.6594	21.5375	8.36562	46.9406	22.375	18.9563	29.8281	16.225	22.8875		47.8	28.1344	28.2969	28.8375	30.6406	25.8344	18.4531	31.9844	44.3906	44.1156	39.9469	39.325	38.6344	38.45	43.7437	36.8094	21.7594	36.8781	36.7188	46.7	52.1656	60.2312	56.1313	54.7719	52.5969
	47.9	46.8687	43.2031	31.3906	45.675	21.5656	8.46562	47.2156	22.2781	18.9031	29.6969	16.0844	23.0593		47.9	27.9875	28.2969	28.9312	30.5469	25.5906	18.7688	32.0125	44.4094	44.0406	40.0125	39.1563	38.6688	38.3656	43.8031	36.775	21.775	36.7375	36.7188	46.7281	52.1656	60.2281	56.1219	54.7812	52.5187
	48	46.9031	43.1344	31.325	45.5469	21.6	8.65937	47.225	22.5	19.1031	29.8094	16.2937	22.9594		48	28.0719	28.3813	28.9656	30.5218	25.575	18.8563	31.9875	44.4969	44.075	39.9532	39.0531	38.6219	38.3969	43.7844	36.7594	21.7437	36.7563	36.7156	46.775	52.2125	60.2219	56.2344	54.7031	52.5219
	48.1	46.6594	43.2344	31.1031	45.5938	21.6219	8.58125	47.3063	22.2625	18.9469	29.7063	16.5031	22.8531		48.1	28.0688	28.5062	28.9718	30.65	25.5188	18.8375	32.0312	44.4156	44.0156	39.975	38.9969	38.5281	38.4906	43.8	36.7625	21.7406	36.8031	36.7406	46.675	52.2656	60.0813	56.2469	54.7188	52.5281
	48.2	46.8313	43.2469	31.1906	45.625	21.5656	8.55	47.2156	22.1219	19	29.7969	16.1625	23.0687		48.2	28.0625	28.5937	28.9562	30.7063	25.5812	18.8125	32.1531	44.3375	44.0219	40.0031	39.0125	38.5375	38.5031	43.7562	36.8219	21.7406	36.8094	36.7344	46.6063	52.2156	60.0969	56.2313	54.7312	52.5156
	48.3	46.8281	43.3312	31.2969	45.4062	21.5313	8.7125	47.1375	22.1781	18.7875	29.8562	16.325	23.0125		48.3	28.1125	28.5125	29.1031	30.6531	25.4	18.8563	32.1281	44.4156	44.0563	39.8844	38.8625	38.4875	38.3125	43.7344	36.8281	21.7312	36.7406	36.7625	46.5219	52.2187	60.0312	56.1813	54.7313	52.5531
	48.4	46.6156	43.15	31.3875	45.4313	21.5812	8.7375	47.375	22.0875	18.9125	29.8219	16.3969	23.0312		48.4	28.15	28.5312	29.05	30.7125	25.3906	18.9094	32.2062	44.3656	44.1031	39.9125	38.925	38.5438	38.3656	43.7719	36.9719	21.7406	36.7375	36.7563	46.4813	52.2906	59.9594	56.1781	54.6844	52.5938
	48.5	46.7406	43.0438	31.5031	45.5625	21.5781	8.79375	47.4812	22.0063	18.9375	29.7625	16.6594	23.0094		48.5	28.1	28.4875	29.0375	30.6062	25.2875	18.8188	32.3031	44.5125	44.1281	39.8688	39.0563	38.6188	38.3531	43.7343	36.8719	21.7875	36.6563	36.7563	46.5562	52.225	60.0656	56.2719	54.5531	52.5156
	48.6	46.5344	43.0219	31.5219	45.5625	21.5844	8.8125	47.2531	21.9719	18.9625	29.6562	16.85	22.9		48.6	27.9969	28.5125	29.0188	30.6531	25.3906	18.7906	32.3844	44.5282	44.0219	39.8813	38.9375	38.55	38.3594	43.6688	36.8875	21.6781	36.7906	36.7625	46.6406	52.275	59.9875	56.1813	54.5406	52.3188
	48.7	46.5656	43	31.3906	45.5469	21.6156	9.00938	47.2094	22.1719	18.7125	29.6531	17.0281	22.725		48.7	27.8219	28.6031	28.9969	30.6469	25.4719	18.9187	32.25	44.5375	44.1188	39.8688	39.0562	38.7187	38.2813	43.725	36.8688	21.6656	36.7656	36.775	46.6781	52.2281	59.85	56.2188	54.5344	52.2312
	48.8	46.6812	43.1344	31.5063	45.5125	21.6531	8.90937	47.2687	22.075	18.8719	29.6594	16.9281	22.6031		48.8	27.6875	28.4656	28.6688	30.5875	25.5437	18.8031	32.2812	44.5	43.9656	39.925	38.95	38.4438	38.3594	43.7781	36.8812	21.7219	36.7469	36.7625	46.6562	52.1563	59.7437	56.2563	54.4688	52.2156
	48.9	46.9094	43.2062	31.3781	45.5469	21.7031	8.90625	47.1937	22.2531	18.8219	29.6187	16.9625	22.6218		48.9	27.775	28.5562	28.7469	30.5906	25.4906	18.725	32.2562	44.4969	44.0094	39.9406	38.9125	38.475	38.3063	43.6906	36.85	21.7781	36.7156	36.7656	46.6406	52.1313	59.7187	56.2531	54.6156	52.2719
	49	46.8563	43.1375	31.2688	45.7062	21.7688	8.875	47.1031	22.1781	18.7625	29.5125	17.125	22.6906		49	27.7625	28.6187	28.8188	30.6594	25.6	18.9219	32.2437	44.5188	44.0656	39.875	38.9	38.3219	38.25	43.5938	36.8469	21.7437	36.6688	36.7719	46.5719	52.0031	59.8469	56.3125	54.55	52.2906
	49.1	46.825	43.1656	31.2188	45.7219	22.075	8.73437	47.2812	21.6281	18.9688	29.2937	17	22.7875		49.1	27.7094	28.6094	28.7813	30.7094	25.575	18.9094	32.1812	44.4594	44.0125	39.8312	38.925	38.5	38.2344	43.5562	36.875	21.7563	36.55	36.7875	46.5156	52.0031	59.8438	56.3	54.475	52.2625
	49.2	46.8344	43.125	31.2031	45.4781	22.2969	8.65312	47.3656	21.675	19.025	29.2781	16.9375	22.8094		49.2	27.6906	28.6719	28.7781	30.7125	25.525	19.1625	32.2156	44.4875	44.075	39.875	38.8813	38.4156	38.2094	43.5875	36.9125	21.7406	36.6781	36.7844	46.5969	51.9625	59.775	56.3	54.4594	52.0969
	49.3	47.0062	43.0094	31.2781	45.6656	22.6125	8.5625	47.3031	21.5562	18.9594	29.2406	16.9187	22.9094		49.3	27.7156	28.5187	28.7782	30.6938	25.6281	18.9688	32.1343	44.5094	44.0313	39.875	38.8656	38.3969	38.1062	43.6187	36.8688	21.7688	36.7063	36.7781	46.55	51.8656	59.7281	56.3063	54.6219	52.1688
	49.4	46.9531	43.3812	31.2	45.6813	22.8313	8.60625	47.1594	21.6219	19.125	29.275	16.8406	22.9719		49.4	27.9469	28.5594	28.8313	30.6906	25.7844	19.225	32.1687	44.5406	44.0219	39.8625	38.875	38.3625	38.1687	43.65	36.9344	21.7937	36.7281	36.8031	46.5812	51.8437	59.7969	56.3031	54.4938	52.2281
	49.5	47.1156	43.8563	31.0656	45.7219	23.0625	8.55312	47.3594	21.7094	19.0031	29.3906	16.85	23.1312		49.5	27.8469	28.6719	28.8719	30.6781	25.9625	19.2563	32.1937	44.4219	44.0781	39.8219	38.9625	38.4313	38.3094	43.5969	36.9031	21.7906	36.675	36.7938	46.5156	51.8437	59.9625	56.3656	54.5219	52.2469
	49.6	47.1781	44.2531	31.2219	45.7781	23.2344	8.4875	47.3219	21.9875	19.1937	29.2937	16.8906	23.0437		49.6	27.9281	28.6625	28.7375	30.6375	25.7625	19.2375	32.3	44.4094	44.125	39.8563	38.95	38.4094	38.3156	43.6188	36.925	21.8125	36.6906	36.8125	46.5406	51.8312	59.8594	56.3844	54.475	52.3188
	49.7	47.1375	44.4312	31.2812	46.0344	23.3562	8.38437	47.1656	21.3031	19.3062	29.2688	16.9719	23.1062		49.7	28.0625	28.5937	28.5343	30.5469	25.6781	19.2281	32.3312	44.4844	44.0562	39.9094	38.9406	38.4094	38.3625	43.4875	36.9219	21.7781	36.775	36.8062	46.5281	51.7969	59.8062	56.2313	54.5406	52.2406
	49.8	47.1937	44.5062	31.3469	45.8844	23.4031	8.525	47.3312	21.5531	19.2875	29.3625	17.1625	23.0844		49.8	28.15	28.7344	28.675	30.4875	25.9406	18.9406	32.3218	44.5125	44.0156	39.8406	38.9188	38.5094	38.4156	43.4969	36.9218	21.7312	36.6844	36.8125	46.6031	51.775	59.925	56.2875	54.5094	52.3375
	49.9	47.225	44.3719	31.2625	45.7063	23.4813	8.575	47.45	21.9313	18.9219	29.2531	17.1562	22.925		49.9	28.0562	28.7219	28.8281	30.4594	25.8656	18.8688	32.2343	44.55	44.0375	39.7469	38.8594	38.4281	38.3344	43.4843	36.9094	21.7656	36.675	36.7938	46.6	51.8812	59.9469	56.2281	54.4719	52.3938
	50	47.2531	44.3062	31.1	45.7844	23.475	8.41875	47.4563	21.7906	19.1781	29.2688	16.7969	22.9438		50	27.9875	28.6719	28.8219	30.4688	26.0094	18.4938	32.3406	44.525	43.9281	39.7719	38.7281	38.4844	38.3094	43.5375	36.975	21.7719	36.575	36.8031	46.5844	51.8625	59.8594	56.2219	54.5406	52.3875
	50.1	47.3062	44.1125	31.3062	31.3062	23.5938	8.39375	47.4031	21.9187	19.2063	29.2875	16.6969	23.1125		50.1	28.0312	28.6938	28.8031	30.5812	25.7812	18.9	32.2687	44.5063	43.9937	39.7906	38.8281	38.5	38.3281	43.6625	36.95	21.7688	36.5094	36.8031	46.5594	51.8406	59.9688	56.1906	54.4531	52.35
	50.2	47.1562	44.0938	31.3156	31.3156	23.6594	8.32188	47.2781	21.7406	19.2656	29.3625	16.6812	23.0344		50.2	28.0062	28.7563	28.8219	30.6812	25.7844	18.6875	32.3093	44.525	44.0657	39.7625	38.8406	38.4375	38.4344	43.5938	36.9843	21.8188	36.5875	36.8031	46.5938	51.8125	59.8875	56.1562	54.4344	52.3
	50.3	46.9906	43.9906	31.3656	31.3656	23.7219	8.25938	47.1469	21.4594	19.1594	29.4594	16.7875	23.0094		50.3	27.8687	28.8406	28.8469	30.7	25.5687	19.0531	32.4063	44.5313	44.0344	39.725	38.8938	38.375	38.2313	43.5844	37.0031	21.8188	36.6313	36.7938	46.5594	51.8062	59.8187	56.1094	54.3875	52.3156
	50.4	46.9281	43.9844	31.4656	31.4656	23.7219	8.16563	47.3344	21.7563	19.2031	29.4281	16.7625	22.9844		50.4	27.9562	28.8375	28.9031	30.6875	25.425	19.2031	32.4281	44.6	44.0219	39.7593	38.8187	38.4469	38.3344	43.6969	37.0344	21.7969	36.6375	36.8156	46.5594	51.8188	59.7094	56.0188	54.4031	52.3281
	50.5	46.9594	43.9625	31.5188	31.5188	23.7031	8.30313	47.2781	21.3781	19.3781	29.4094	16.6687	22.9031		50.5	27.8438	28.8375	28.8438	30.575	25.4406	19.1937	32.45	44.6656	44.0437	39.7906	38.8469	38.6281	38.325	43.5969	37.0281	21.8	36.4844	36.8312	46.5656	51.8406	59.7812	55.8625	54.375	52.2687
	50.6	46.8969	44.075	31.475	31.475	23.8781	8.20938	47.3406	21.1906	19.4	29.5281	16.5531	22.8813		50.6	27.8812	28.7938	28.8563	30.5468	25.4719	19.2688	32.4625	44.5969	43.975	39.7812	38.9094	38.5094	38.2594	43.6812	37.1	21.7844	36.5031	36.825	46.6156	51.8906	59.8844	55.9656	54.4125	52.2844
	50.7	46.8813	43.8781	31.525	31.525	24.7	8.25	47.2594	21.6	19.2406	29.5281	16.4969	22.9312		50.7	27.7875	28.7625	28.7219	30.3875	25.5375	19.325	32.4156	44.6438	43.9031	39.7687	38.9	38.5656	38.1875	43.6531	37.1906	21.8438	36.5156	36.8219	46.525	51.85	59.875	55.95	54.3437	52.1812
	50.8	46.675	43.825	31.4594	31.4594	25.5062	8.25	47.3156	21.7344	19.0531	29.6531	16.2563	23.025		50.8	27.8781	28.6938	28.8375	30.4594	25.575	19.5906	32.4969	44.6563	44.025	39.8563	38.9719	38.5938	38.2188	43.6063	37.0469	21.8125	36.425	36.8219	46.5438	51.8625	59.8375	55.8969	54.3094	52.1156
	50.9	46.6656	43.725	31.4906	31.4906	26.1	8.31563	47.1782	21.4406	19.2937	29.6562	16.7563	23.2468		50.9	27.8156	28.4781	28.925	30.5031	25.725	19.5344	32.4531	44.6688	43.9719	39.7906	38.9094	38.5219	38.2531	43.675	37.1	21.8188	36.4594	36.8281	46.5375	51.7687	59.7719	55.8813	54.3625	52.1562
	51	46.625	43.7813	31.4719	31.4719	26.3062	8.4	47.1875	21.3687	19.4094	29.7219	16.5875	23.2		51	27.8062	28.45	28.8938	30.4844	25.6625	19.3844	32.4875	44.725	43.9343	39.7531	38.8969	38.4781	38.275	43.7687	37.1187	21.7875	36.5187	36.8344	46.5625	51.6875	59.7687	55.8844	54.3062	52.1344
	51.1	46.6	43.7125	31.4156	31.4156	26.2906	8.40625	47.225	21.6313	19.2781	29.6531	16.5812	23.0719		51.1	27.8156	28.3969	28.7844	30.5125	25.6812	19.3781	32.3781	44.6719	43.9812	39.7938	38.9656	38.5562	38.2125	43.5469	37.0344	21.8125	36.5	36.825	46.5719	51.7187	59.7906	55.9031	54.2375	52.1437
	51.2	46.6312	43.6312	31.2781	31.2781	26.3094	8.39687	47.1	21.5906	19.3875	29.5594	16.8656	23.2906		51.2	27.8438	28.2844	28.7281	30.5312	25.7375	19.4687	32.3656	44.6719	43.9562	39.7562	38.9594	38.6	38.1969	43.6188	37.0687	21.7969	36.5656	36.8375	46.475	51.6969	59.8094	55.8312	54.2094	52.2125
	51.3	46.6469	43.6281	31.4844	31.4844	26.4	8.35625	47.3375	21.7125	19.2719	29.5844	16.9844	23.3		51.3	27.8156	28.1594	28.7813	30.4844	25.85	19.5125	32.4	44.6844	43.8906	39.6594	39.0281	38.6594	38.1812	43.5594	37.0281	21.7906	36.5969	36.8375	46.45	51.5906	59.5031	55.8312	54.1	52.1906
	51.4	46.7906	43.5781	31.3687	31.3687	26.6687	8.39375	47.2719	21.6656	19.0813	29.8188	16.8625	22.9719		51.4	27.9031	28.25	28.7	30.5406	25.8188	19.45	32.3375	44.6625	43.9031	39.75	38.9813	38.5594	38.2125	43.5438	36.9594	21.75	36.5875	36.8469	46.4438	51.6719	59.4562	55.8937	54.0844	52.2625
	51.5	46.9312	43.625	31.3281	31.3281	27	8.35937	47.2	21.5031	19.0938	29.8969	16.7094	23.3187		51.5	27.9718	28.1156	28.7657	30.6375	25.6844	19.4187	32.2875	44.6688	43.8937	39.8094	38.8719	38.5812	38.1281	43.475	37.0031	21.7875	36.6344	36.8406	46.4781	51.6312	59.4875	55.7844	54.075	52.2906
	51.6	46.9469	43.575	31.3313	31.3313	27.2094	8.15938	47.2594	21.3187	19.2719	29.8344	16.8188	23.0125		51.6	27.8219	28.1375	28.7375	30.4281	25.5719	19.3406	32.4156	44.6719	43.9062	39.8062	38.8969	38.6844	38.1469	43.6656	37.0406	21.7281	36.5344	36.8375	46.5719	51.65	59.5344	55.8375	54.1313	52.1875
	51.7	47.0125	43.5688	31.35	31.35	27.8469	8.22813	47.5156	21.0625	19.4344	29.8969	16.775	23.1		51.7	27.8344	28.0406	28.8531	30.3938	25.6719	18.9219	32.4781	44.7687	44	39.7344	38.9469	38.7781	38.0844	43.5875	37.0812	21.7156	36.5437	36.8406	46.5375	51.65	59.4781	55.8281	54.1906	52.2219
	51.8	47.0344	43.6125	31.3562	31.3562	28.1156	8.03438	47.5187	21.025	19.1844	29.9344	16.8906	23.1875		51.8	27.925	28.1093	28.95	30.4812	25.3562	18.8469	32.4281	44.6969	44.0813	39.7	38.9938	38.8375	38.0937	43.5062	37.1219	21.7219	36.4469	36.8438	46.5438	51.6531	59.3219	55.75	54.1906	52.2
	51.9	47.0219	43.625	31.3656	31.3656	28.2563	8.05312	47.3281	21.0562	19.1656	29.8469	17.0219	23.2656		51.9	27.7812	28.1594	28.9187	30.5094	25.3281	18.9688	32.4656	44.6094	44.0906	39.8875	38.9625	38.6844	38.0406	43.6031	37.0781	21.7094	36.475	36.8594	46.5562	51.5563	59.1625	55.7562	54.1906	52.1937
	52	47.0563	43.6125	31.3281	31.3281	28.2875	8.06875	47.3844	21.1156	18.9438	29.7531	17.0938	23.1656		52	27.7312	28.0812	28.8906	30.4719	25.4469	19.0531	32.3562	44.5969	44.05	39.7844	38.8906	38.6844	38.1094	43.5781	37.1063	21.7281	36.4688	36.8406	46.5656	51.6125	59.2969	55.6906	54.2562	52.1656
	52.1	47.0438	43.5812	31.45	31.45	28.0406	8.45	47.4438	21.1344	19.1062	29.7281	17.0562	23.0344		52.1	27.7281	28.1156	28.9125	30.5031	25.4031	19.1906	32.1219	44.6344	44.05	39.7656	38.85	38.7438	38.075	43.5531	37.0437	21.7469	36.4906	36.8687	46.5187	51.6344	59.1937	55.6281	54.2	52.0906
	52.2	46.7062	43.6344	31.4	31.4	28.1938	8.73125	47.4937	21.0781	19.3031	29.8094	17.1969	22.9656		52.2	27.7187	28.075	28.9656	30.4719	25.5375	19.4	32.075	44.675	44.1344	39.7906	38.8781	38.6938	37.9594	43.5094	37.1125	21.7375	36.4375	36.8531	46.4375	51.6562	59.275	55.7063	54.125	52.0656
	52.3	46.7094	43.5531	31.4219	31.4219	28.5281	8.74062	47.3687	21.5406	19.3313	29.8281	17.0906	23.175		52.3	27.6812	28.0343	28.975	30.5812	25.475	19.3875	32.0687	44.6813	44.0719	39.75	38.9282	38.75	37.8781	43.475	37.1375	21.7375	36.2125	36.8531	46.4906	51.6	59.3344	55.5406	54.1125	52.1688
	52.4	46.7656	43.5562	31.3719	31.3719	28.9281	9.03437	47.1219	21.475	19.3094	29.9688	17.1906	23.2031		52.4	27.8125	28.1719	29	30.4531	25.3656	19.35	32.1719	44.725	44.0219	39.7062	38.9281	38.7281	38.0344	43.4875	37.1469	21.7437	36.2812	36.8656	46.3969	51.6406	59.3344	55.575	54.0875	52.1781
	52.5	46.6844	43.5625	31.4344	31.4344	29.0562	8.97187	47.3313	21.4344	19.2875	30.2031	17.3188	23.1062		52.5	27.8688	28.1594	28.9594	30.5719	25.4344	19.4187	32.2625	44.6594	43.9531	39.7062	38.8563	38.6781	38.0437	43.5281	37.0844	21.7156	36.3375	36.85	46.45	51.5938	59.3188	55.5281	54.0687	52.1469
	52.6	46.7937	43.5656	31.3531	31.3531	28.8906	9.05	47.4531	21.5781	19.3063	30.0437	17.3937	23.2719		52.6	27.7438	28.05	29	30.6625	25.6344	19.3125	32.2125	44.7437	44.0594	39.7625	38.9281	38.8	38.0344	43.4969	37.1656	21.7063	36.2844	36.85	46.5469	51.4437	59.3313	55.5531	54.0969	52.0906
	52.7	46.9719	43.5125	31.3094	31.3094	29.05	8.99062	47.5344	21.7844	19.2063	29.9	17.5031	23.4125		52.7	27.7719	28.0656	28.9781	30.625	25.6562	19.3344	32.2406	44.7562	44.0969	39.8	38.9219	38.7688	37.9656	43.4656	37.1406	21.7156	36.2531	36.8531	46.4688	51.3625	59.3063	55.5062	54.0812	52.0875
	52.8	46.8281	43.4281	31.2781	31.2781	29.1594	9.0375	47.4281	21.9156	19.375	29.9688	17.6312	23.425		52.8	27.9437	28.2813	28.9187	30.6156	25.5062	19.4937	32.1219	44.8094	44.0844	39.8	38.9375	38.7875	38.0781	43.4687	37.2094	21.7	36.3156	36.8781	46.4531	51.4813	59.2687	55.4125	54.1344	52.1688
	52.9	46.7094	43.3438	31.2937	31.2937	29.6719	9.08437	47.4	22.1781	19.5625	29.85	17.6594	23.4375		52.9	27.9094	28.3469	28.9031	30.5969	25.7094	19.5062	32.1437	44.8062	43.9875	39.775	38.9406	38.8375	38.1781	43.5187	37.2156	21.7	36.3344	36.8875	46.5938	51.525	59.275	55.4094	54.0781	52.1125
	53	46.9187	43.2375	31.2812	31.2812	30.2156	8.93125	47.375	22.0219	19.6469	29.85	17.3719	23.3094		53	27.8906	28.3157	28.8281	30.5719	25.7687	19.6281	32.2	44.7375	43.8937	39.8031	38.85	38.8531	38.225	43.4937	37.1844	21.7063	36.3125	36.875	46.6219	51.4031	59.2062	55.3937	54.0656	52.1281
	53.1	46.8312	43.1875	31.4125	31.4125	30.5156	8.81563	47.3656	21.9156	19.4844	29.7594	17.275	23.3687		53.1	27.9625	28.3563	28.6156	30.7062	25.5875	19.5375	32.2812	44.6812	43.8844	39.825	38.9719	38.775	38.0562	43.4719	37.1782	21.7281	36.2437	36.8625	46.6375	51.5531	59.1094	55.3625	53.9781	52.0938
	53.2	46.7437	43.1844	31.2688	31.2688	29.7031	8.725	47.3781	22.3	19.4313	29.6156	17.2688	23.2875		53.2	27.9687	28.3719	28.5812	30.7406	25.3531	19.625	32.15	44.75	43.8	39.8406	38.9562	38.8156	38.1875	43.5094	37.2312	21.7656	36.2531	36.8813	46.65	51.3969	59.1	55.4875	54.0094	52.1063
	53.3	46.8	43.1562	31.3094	31.3094	30.1031	8.89062	47.3406	21.7469	19.4625	29.6625	17.2813	23.1719		53.3	27.9281	28.3594	28.6563	30.7375	25.4438	19.6094	32.15	44.7375	43.8968	39.825	39.0312	38.6906	38.0781	43.4594	37.2531	21.7625	36.2531	36.8719	46.6875	51.5	59.0281	55.5	53.9563	52.1187
	53.4	46.8688	43.2437	31.3125	31.3125	30.7969	8.71562	47.2594	21.8187	19.6312	29.7563	17.4719	23.4125		53.4	27.9031	28.2938	28.8031	30.7031	25.325	20.0375	32.2218	44.7594	43.9469	39.7781	39.1438	38.6938	38.1312	43.5125	37.2156	21.7781	36.2937	36.8906	46.7219	51.5906	59.1	55.4313	53.9656	52.0594
	53.5	46.9031	43.275	31.3062	31.3062	30.6875	8.79687	47.1969	21.8469	19.5688	29.9031	17.6062	23.5469		53.5	27.9812	28.375	28.7782	30.7906	25.4375	19.7469	32.2719	44.7937	43.9937	39.7594	39.1344	38.7125	38.1719	43.5594	37.225	21.7656	36.2469	36.8937	46.6625	51.5906	59.1031	55.475	54.0312	52.025
	53.6	46.8969	43.3312	31.2969	31.2969	30.75	8.70624	47.2781	21.875	19.3469	29.8625	17.4719	23.325		53.6	27.9625	28.3969	28.8781	30.7782	25.2969	19.775	32.2031	44.7281	44.075	39.7062	39.0969	38.8156	38.1781	43.575	37.2719	21.775	36.2281	36.8937	46.6406	51.5906	59.0344	55.4625	54.0625	52.1125
	53.7	46.7313	43.2625	31.3062	31.3062	30.7812	8.71562	47.3125	21.6875	19.5531	29.8656	17.4125	23.4438		53.7	27.9843	28.475	28.8813	30.7657	25.4281	19.9594	32.2469	44.7469	44.0187	39.7312	39.0906	38.6625	38.1187	43.5844	37.2406	21.7563	36.275	36.8906	46.6406	51.4906	58.9875	55.3937	54.0438	52.0563
	53.8	46.7469	43.2844	31.3719	31.3719	30.6719	8.69375	47.3125	21.6562	19.7688	29.7844	17.3687	23.3625		53.8	28.0719	28.6	28.875	30.7063	25.4844	19.9406	32.1906	44.7375	43.9875	39.7812	39.1094	38.6375	38.2031	43.5469	37.25	21.7437	36.3	36.8813	46.6562	51.6437	58.8688	55.3156	54.1187	52.1406
	53.9	46.6781	43.3594	31.4937	31.4937	30.7469	8.675	47.4469	21.4875	19.6437	29.8062	17.3531	23.3656		53.9	28.1219	28.3813	28.95	30.6687	25.4875	19.8344	32.0969	44.7312	43.9844	39.6937	39.0312	38.675	38.1625	43.6438	37.1969	21.7531	36.1937	36.8844	46.7062	51.6656	58.7937	55.275	54.125	52.1125
	54	46.6219	43.4844	31.3031	31.3031	31.0813	8.6375	47.4219	21.3438	19.4781	29.8438	17.6125	23.3062		54	27.9625	28.4906	28.8781	30.6875	25.4125	19.7531	32.1593	44.7687	43.9781	39.7875	39.0125	38.6875	38.075	43.5938	37.2562	21.7688	36.1625	36.8937	46.7563	51.6781	58.7813	55.2406	54.1313	52.0938
	54.1	46.6063	43.4969	31.3844	31.3844	31.3344	8.58125	47.4344	21.1594	19.7219	30.0094	17.5469	23.375		54.1	27.9844	28.6938	28.7	30.7031	25.4781	19.8281	32.0406	44.7187	43.9406	39.7531	39.0031	38.6844	38.2062	43.6375	37.2719	21.7937	36.175	36.9	46.7188	51.6219	58.85	55.4	54.0125	52.0781
	54.2	46.5219	43.4688	31.4594	31.4594	31.2594	8.6625	47.4	21.7094	19.6719	29.7906	17.5469	23.5875		54.2	27.875	28.8781	28.8625	30.7375	25.3656	19.6687	32.1125	44.7812	43.9937	39.7469	38.9219	38.6	38.15	43.6531	37.3094	21.8125	36.1719	36.925	46.7	51.5187	58.85	55.3875	54.0781	51.9063
	54.3	46.6375	43.5031	31.4531	31.4531	31.4031	8.62812	47.4844	21.7375	19.8125	29.6438	17.475	23.4906		54.3	27.8031	28.9062	28.875	30.725	25.5344	19.7625	32.1094	44.7281	44.0094	39.8	38.9781	38.6469	38.0562	43.5688	37.325	21.7719	36.0344	36.9094	46.7	51.5656	58.8969	55.2719	54.0438	52.0906
	54.4	46.6219	43.5031	31.4719	31.4719	31.5125	8.54687	47.3937	21.5688	19.8781	29.5375	17.5	23.2062		54.4	27.7813	28.9094	28.9844	30.7781	25.5312	20.0125	32.0312	44.7156	44.0063	39.8594	38.9719	38.6125	38.0312	43.5406	37.2781	21.7375	36.1188	36.9406	46.7375	51.5156	58.8312	55.225	54.0375	52.0813
	54.5	46.7781	43.5063	31.5844	31.5844	31.5375	8.82812	47.4937	21.9406	19.7656	29.4281	17.5281	23.2		54.5	27.7406	29.0125	28.9062	30.7625	25.5344	20.1375	32.2062	44.7687	43.9719	39.8032	39.0156	38.5781	38.0281	43.5656	37.3	21.725	36.1125	36.9344	46.7563	51.4781	58.8875	55.25	54.0781	52.0812
	54.6	46.6188	43.4094	31.6344	31.6344	31.6625	8.98125	47.4	21.8187	19.6906	29.4937	17.3437	23.3469		54.6	27.6437	29.1	28.875	30.7781	25.4844	20.0594	32.1937	44.7218	43.9937	39.8594	38.9156	38.4937	38.05	43.5312	37.2562	21.7156	36.0344	36.9281	46.7719	51.4844	59.0812	55.2844	53.9469	52.1094
	54.7	46.5625	43.2625	31.7156	31.7156	31.8594	9.11562	47.5625	22.1813	19.9219	29.6594	17.4469	23.4344		54.7	27.5875	29.0594	28.8906	30.8313	25.5281	20.25	32.2125	44.6969	43.9906	39.8938	38.9781	38.475	38.1093	43.4875	37.1594	21.775	36.0687	36.9438	46.7469	51.4531	59.075	55.2125	53.9031	52.0813
	54.8	46.8375	43.1969	31.5875	31.5875	31.8906	9.13438	47.3531	22.2563	19.825	29.7594	17.5062	23.4844		54.8	27.7875	29.125	28.8875	30.7938	25.4344	20.2594	32.1718	44.7281	44.0375	39.8938	38.975	38.525	38.1156	43.4344	37.1813	21.7625	36.0625	36.95	46.7	51.4156	59.0531	55.1719	53.9406	52.1063
	54.9	46.8937	43.2469	31.6	31.6	31.9531	9.14687	47.5406	22.3313	19.9406	29.8	17.4687	23.4281		54.9	27.9281	29.1594	29.0375	30.9125	25.2906	20.0125	32.2343	44.7156	43.9468	39.925	39.0156	38.4125	38.0906	43.5187	37.2875	21.7469	36.0188	36.9625	46.7031	51.3406	58.9688	55.175	54.0219	52.0625
	55	46.8156	43.2031	31.6313	31.6313	32.0656	9.14687	47.3406	22.2437	19.9187	29.6594	17.4156	23.5344		55	28.0281	29.2438	28.925	30.8844	25.3562	20.0437	32.2312	44.7844	43.9344	39.8531	39.05	38.5	38.1312	43.5031	37.2593	21.8094	36.0656	36.9625	46.7375	51.3	58.9781	55.1688	54.0719	52.0438
	55.1	46.8813	43.2875	31.5094	31.5094	32.0438	9.17188	47.3156	22.0406	19.7875	29.65	17.6125	23.5344		55.1	27.9781	29.1969	28.9406	30.8656	25.4438	20.0562	32.2343	44.7562	43.975	39.8156	38.9594	38.4937	38.1719	43.4969	37.2531	21.8406	36.0844	36.9438	46.725	51.3781	58.9406	55.0969	54.0187	52.0375
	55.2	46.8937	43.375	31.5594	31.5594	32.0719	9.04687	47.4781	21.9688	19.8156	29.6438	17.7594	23.5375		55.2	27.9843	29.2781	28.9156	30.8563	25.4312	20.0531	32.15	44.7094	44.025	39.8156	38.9281	38.4531	38.1125	43.525	37.175	21.8094	36.0469	36.9438	46.6156	51.3844	58.8125	55.1688	53.8687	52.0063
	55.3	46.925	43.2	31.45	31.45	32.0656	9.01875	47.4406	21.9969	19.7062	29.5813	17.6844	23.4563		55.3	28.0187	29.3063	29.0094	30.9219	25.45	19.9531	32.2218	44.6875	43.9406	39.8313	38.8906	38.4781	38.1219	43.5187	37.2156	21.825	36.1281	36.95	46.6375	51.2906	58.8812	55.075	53.8625	51.9813
	55.4	46.8719	43.1562	31.5594	31.5594	32.0469	9.05625	47.2625	22.1438	19.5875	29.4312	17.4594	23.4875		55.4	27.9312	29.2531	28.9406	30.8657	25.4875	19.9687	32.1562	44.7969	43.9625	39.8375	38.8844	38.5344	38.0312	43.4843	37.225	21.85	36.1937	36.9406	46.7344	51.3406	58.975	55.1	53.8844	51.9125
	55.5	46.8688	43.1906	31.5469	31.5469	32.1969	9.09375	47.4344	21.9281	19.6625	29.5813	17.1219	23.5906		55.5	28.0375	29.1594	28.7625	30.8063	25.4656	19.9438	32.1093	44.825	43.9437	39.8375	38.8563	38.6156	37.9812	43.3594	37.2156	21.7844	36.0438	36.9531	46.8031	51.225	58.9656	55.0094	53.7719	51.95
	55.6	47.0469	43.1219	31.5094	31.5094	32.2844	9.0625	47.4594	22.4844	19.9625	29.6375	17.225	23.6		55.6	28.0968	29.2438	28.7282	30.8	25.4812	20.1187	32.0406	44.7687	43.9781	39.8063	38.7875	38.5906	38.1094	43.4187	37.2531	21.7937	36.0812	36.9531	46.775	51.1687	58.9031	55.0188	53.825	51.95
	55.7	47.0594	43.1531	31.4719	31.4719	32.55	9.02812	47.1156	21.9469	19.9969	29.6344	17.3437	23.6812		55.7	28.05	29.3688	28.6875	30.6969	25.4688	20.3656	32.0312	44.7031	43.9938	39.8531	38.7	38.5156	38.1312	43.425	37.3688	21.7688	36.1687	36.9688	46.6781	51.2187	58.8438	55.0156	53.8312	51.9094
	55.8	47.0875	42.9625	31.5156	31.5156	32.8969	8.94063	47.3312	22.3062	20.0125	29.65	17.0688	23.5188		55.8	28.15	29.2344	28.7219	30.7094	25.4063	20.0594	31.975	44.7875	43.8594	39.8313	38.6844	38.6063	38.0375	43.4125	37.2781	21.7719	36.1844	36.9469	46.7781	51.0969	58.8437	55.0031	53.8625	51.9719
	55.9	47.0562	42.8906	31.5094	31.5094	32.9969	8.98125	47.3	21.6062	19.8	29.7063	17.2094	23.6219		55.9	28.1781	29.25	28.8156	30.7719	25.4312	20.0844	32.05	44.7625	43.9125	39.8719	38.9063	38.5468	38.0125	43.4062	37.2719	21.7531	36.0625	36.9781	46.7188	51.2	58.8219	54.9719	53.7969	51.95
	56	46.9406	42.9844	31.5125	31.5125	32.8875	8.95937	47.2375	21.6438	19.7969	29.6438	17.2063	23.55		56	28.275	29.3125	28.8719	30.7375	25.4688	19.8906	32.0125	44.7687	43.8875	39.8125	39.0156	38.5656	38.0062	43.3844	37.2625	21.7469	35.9125	36.9844	46.7656	51.2719	58.7531	54.9687	53.8656	52.0563
	56.1	47.0344	42.9219	31.5063	31.5063	32.8125	9.09062	47.0844	21.5844	20.0094	29.5656	17.5437	23.5344		56.1	28.2188	29.425	28.8219	30.7656	25.6187	19.9687	32.0437	44.8469	43.925	39.7406	39.0312	38.4969	38.05	43.3594	37.2562	21.7125	35.95	36.9625	46.8188	51.2094	58.7219	55.0156	53.8375	52.0344
	56.2	47.1	42.8625	31.5063	31.5063	32.8188	9.11875	47.1938	21.6	20.0844	29.5063	17.575	23.7218		56.2	28.325	29.4594	28.7688	30.7313	25.6344	19.9719	32.0625	44.7906	44.0094	39.825	39.0562	38.5187	38.1219	43.3188	37.1906	21.7406	35.8812	36.9625	46.8406	51.1875	58.7406	55.0281	53.7937	51.9875
	56.3	47.3187	42.7875	31.4906	31.4906	32.8062	9.25	47.3656	21.1812	20.1219	29.6031	17.5719	23.7781		56.3	28.3844	29.4594	28.7438	30.7625	25.4094	19.9844	31.975	44.8219	43.8875	39.7437	39.0406	38.5063	38.0625	43.3125	37.2062	21.8125	35.9062	36.95	46.8281	51.1094	58.6875	55.0094	53.7937	51.9375
	56.4	47.2781	42.8687	31.6594	31.6594	32.8094	9.2	47.4437	21.4	20.1531	29.65	17.5375	23.7187		56.4	28.2156	29.4094	28.7594	30.7156	25.4312	20.1062	31.925	44.8344	43.8718	39.7125	39.075	38.4469	38.0093	43.3094	37.2062	21.775	35.9625	36.9656	46.8156	51.1156	58.6719	54.9	53.8031	51.8406
	56.5	46.8	43.2188	31.6375	31.6375	32.7437	9.22188	47.2156	20.9031	20.4187	29.7094	17.55	23.6937		56.5	28.0062	29.3	28.7125	30.6781	25.5719	19.9562	31.925	44.8938	43.8656	39.7281	39.0594	38.3938	38.0125	43.3719	37.1812	21.7906	36.0156	36.975	46.8875	51.15	58.5844	54.9375	53.8156	51.9406
	56.6	46.8656	43.3906	31.5312	31.5312	32.775	9.30938	47.2438	20.7781	20.1438	29.6469	17.5406	23.8156		56.6	27.9968	29.2688	28.7688	30.5906	25.5187	20.1219	31.9281	44.8031	43.8812	39.775	38.9594	38.4344	38.1094	43.3844	37.1187	21.8	36.0187	36.9781	46.8219	51.1844	58.55	54.975	53.8125	51.9687
	56.7	46.85	43.6062	31.6344	31.6344	32.8687	9.35312	47.4062	20.9938	20.2656	29.7531	17.6313	23.825		56.7	27.8687	29.3531	28.8282	30.7531	25.5375	20.0469	31.8875	44.7187	43.8937	39.7344	39.0219	38.5031	38.05	43.4156	37.1781	21.8125	36	36.9781	46.8438	51.2312	58.4219	55.0125	53.7437	51.8844
	56.8	46.7813	43.5875	31.6438	31.6438	33.3062	9.32188	47.3438	21.0969	20.2938	29.9187	17.5687	23.8563		56.8	27.7813	29.3031	28.775	30.7156	25.5031	20.225	31.9438	44.7906	43.9687	39.7375	39.0281	38.525	38.0625	43.3812	37.0906	21.8406	36.0438	36.9813	46.7906	51.2594	58.3813	55.0125	53.6438	51.8594
	56.9	46.5563	43.4906	31.4469	31.4469	33.5781	9.45312	47.5	20.8938	19.8969	29.95	17.6719	23.7812		56.9	27.8438	29.3313	28.9125	30.6687	25.8469	20.1562	31.9156	44.8156	43.8937	39.8062	38.9031	38.5	38.0718	43.3688	37.1719	21.8406	36.0875	36.9937	46.8375	51.1125	58.525	54.9937	53.6625	51.8375
	57	46.6812	43.6875	31.5188	31.5188	34.1094	9.51875	47.325	21	20.0594	29.9094	17.4656	23.7719		57	27.8	29.2969	28.7156	30.7406	25.6156	20.3531	31.9031	44.7687	43.9906	39.7656	38.9156	38.4531	38.1031	43.3094	37.1688	21.7844	36.05	37.0031	46.8406	51.1188	58.5687	55.0406	53.6781	51.7531
	57.1	46.725	43.5406	31.5188	31.5188	34.3469	9.51563	47.4906	21.1875	20.0812	30.1031	17.6	23.8719		57.1	27.8937	29.2938	28.6531	30.7625	25.4875	20.125	31.8687	44.6813	43.9437	39.7687	38.9875	38.5375	38.0781	43.3656	37.2281	21.8219	36.0031	37.0063	46.8312	51.1969	58.4813	55.025	53.6063	51.9312
	57.2	46.6312	43.4687	31.575	31.575	34.4219	9.49375	47.3937	20.8969	20.1125	30.0375	17.7156	23.7437		57.2	27.9469	29.2782	28.575	30.7938	25.3719	20.2563	31.9625	44.7437	43.9218	39.8	39.0844	38.4312	38.0562	43.4437	37.3344	21.8469	35.9812	37.025	46.85	51.1906	58.3844	54.9219	53.5906	51.8719
	57.3	46.775	43.5	31.5625	31.5625	34.4375	9.4375	47.2875	21.2344	20.1656	29.8594	17.6437	23.7594		57.3	28.0188	29.2438	28.7625	30.8375	25.3812	20.2281	32.0125	44.7094	43.9406	39.7844	39.0438	38.6094	37.9969	43.525	37.3031	21.8219	35.9813	37.0219	46.8062	51.2656	58.4875	54.9906	53.5937	51.875
	57.4	46.7688	43.4031	31.6594	31.6594	34.3469	9.45625	47.4281	21.2375	20.15	29.8562	17.5531	23.6469		57.4	27.9469	29.3	28.8719	30.8157	25.6375	19.9219	31.8938	44.7375	44.0094	39.8094	38.9532	38.5094	38.0062	43.3156	37.3687	21.7906	36.0437	37.0312	46.8656	51.225	58.4312	54.975	53.55	51.8187
	57.5	46.7687	43.4094	31.6	31.6	34.5406	9.38125	47.5062	20.7469	20.1344	29.7656	17.5937	23.7281		57.5	28.1187	29.375	28.8625	30.7063	25.5062	19.8531	31.9531	44.7187	43.9562	39.7719	38.9719	38.525	38.0625	43.4219	37.3188	21.8125	35.9688	37.0156	46.825	51.2844	58.4156	54.9656	53.6063	51.9062
	57.6	46.7469	43.4062	31.6781	31.6781	34.3687	9.52188	47.5156	20.925	20.0812	29.9469	17.7063	23.8187		57.6	28.1875	29.3813	28.8906	30.7906	25.6219	19.8813	31.8375	44.6813	44.0094	39.8344	38.9813	38.5719	38.0531	43.3094	37.3344	21.8156	36.0219	37.0125	46.8312	51.1813	58.4812	54.9219	53.5312	51.8031
	57.7	46.7406	43.2344	31.65	31.65	33.7094	9.64062	47.7812	20.8594	20.0969	30.0437	17.8469	23.9406		57.7	28.15	29.4188	28.8875	30.8094	25.4625	19.7969	31.9188	44.7281	43.9625	39.8156	38.9469	38.5719	38.0562	43.2656	37.2188	21.8406	36.0219	37.025	46.825	51.175	58.35	54.9687	53.5406	51.7906
	57.8	46.725	43.3469	31.6531	31.6531	33.3594	9.52812	47.825	20.5687	20	29.9781	17.9719	23.7562		57.8	28.1625	29.4281	28.9093	30.8875	25.6625	19.9344	31.9313	44.8469	43.8	39.8	38.9906	38.6156	38.0718	43.3125	37.2844	21.825	36.0344	37.0219	46.8531	51.1219	58.2188	54.9125	53.5469	51.8031
	57.9	46.6781	43.3906	31.6281	31.6281	33.0812	9.60625	47.6844	20.8937	20.0406	29.9531	18.0656	23.9156		57.9	28.2031	29.4125	29	30.8219	25.6937	20.0063	31.975	44.7812	43.9094	39.8062	38.95	38.6313	38.1469	43.4594	37.2687	21.8219	36.0781	37.0187	46.7969	51.1563	58.0656	54.8625	53.6	51.8344
	58	46.4906	43.2375	31.7719	31.7719	33.4	9.70625	47.7	20.9062	20.175	29.9969	18.0156	23.9531		58	28.1969	29.3938	29.05	30.8656	25.5437	20.0219	31.8844	44.7562	43.9031	39.7812	38.9406	38.5562	38.0875	43.3531	37.2125	21.8375	36	37.0438	46.8563	51.2188	58.0531	54.7844	53.5687	51.7594
	58.1	46.5844	43.2938	31.8281	31.8281	33.5312	9.61875	47.7375	20.9156	20.3313	30.1687	17.8313	23.7937		58.1	28.2938	29.3438	29.0406	30.8938	25.4844	20.1625	31.8531	44.7906	43.9531	39.8438	39.0156	38.5312	38.1062	43.3312	37.1906	21.8594	36.0719	37.0469	46.8875	51.2437	58.1375	54.7437	53.55	51.8219
	58.2	46.7125	43.3437	31.8	31.8	33.3188	9.56563	47.7687	20.7031	20.2594	30.1656	17.7281	23.8719		58.2	28.2532	29.4219	29.0094	30.9688	25.5562	20.2094	31.9375	44.75	44.0281	39.7969	39.0875	38.4813	38.0468	43.3625	37.2469	21.8469	36.0406	37.0531	46.75	51.2281	58.0313	54.7438	53.4656	51.8031
	58.3	46.7375	43.3031	31.75	31.75	32.8375	9.77187	47.9094	20.7937	20.45	30.3625	17.9375	24.0312		58.3	28.1906	29.375	29.0156	30.9344	25.6219	20.1906	32.0687	44.7062	43.9844	39.8063	39.0594	38.3594	38.1125	43.3031	37.1969	21.8406	35.775	37.0312	46.8281	51.225	57.9375	54.7937	53.4875	51.7875
	58.4	46.6812	43.2469	31.7812	31.7812	33.3062	9.78437	47.775	20.7094	20.3781	30.4563	17.6156	23.9656		58.4	28.1031	29.3469	29.0031	30.6438	25.5656	20.175	32.0031	44.6938	44.0969	39.8344	39.0969	38.3625	38.0093	43.2844	37.2343	21.8531	35.8563	37.0594	46.8188	51.2781	57.9219	54.5969	53.5375	51.7781
	58.5	46.7281	43.3187	31.7437	31.7437	34.1688	9.8125	47.725	20.875	20.2875	30.3281	17.8719	24.0219		58.5	28.1187	29.3969	28.9719	30.8719	25.525	20.2531	31.8281	44.7312	44.0438	39.7594	39.1125	38.3156	38.1187	43.2969	37.2594	21.8781	35.7656	37.0625	46.825	51.2375	57.875	54.6781	53.5969	51.8844
	58.6	46.8094	43.3312	31.825	31.825	34.8625	9.95625	47.7313	20.8813	20.3594	30.3438	17.8313	24.0469		58.6	28.0844	29.3469	29.075	30.9281	25.6938	20.5344	31.8625	44.6938	44.0281	39.7625	39.0906	38.3875	38.2281	43.2844	37.1937	21.8625	35.8156	37.0687	46.8969	51.2031	57.9687	54.6313	53.5625	51.9
	58.7	46.9	43.4875	31.8375	31.8375	35.1187	10.0312	47.7625	20.7844	20.3938	30.45	17.6594	24.1656		58.7	28.0812	29.3782	29.0438	30.875	25.7125	20.6281	31.8938	44.7062	44.0031	39.825	39.1125	38.3313	38.1594	43.3063	37.225	21.85	35.6719	37.0719	46.9438	51.2594	57.9875	54.6	53.4188	51.8844
	58.8	46.9406	43.3156	31.8469	31.8469	35.2031	10.125	47.7188	20.65	20.3188	30.5531	17.9	24.0063		58.8	28.0281	29.45	29.0375	30.7719	25.6281	20.4875	31.95	44.6781	44.0438	39.7844	39.0719	38.3656	38.0875	43.2594	37.225	21.8781	35.6938	37.0906	46.975	51.2	58.0031	54.7	53.5344	51.8687
	58.9	46.9594	43.3406	31.7594	31.7594	35.2656	10.075	47.5969	20.8844	20.5344	30.6906	17.8906	24.175		58.9	28.1406	29.3531	29.1156	30.8969	25.6875	20.5281	31.8562	44.6531	44.0313	39.7594	39.075	38.2938	38.2813	43.2813	37.1531	21.8875	35.6187	37.0781	46.9781	51.2875	57.8531	54.6719	53.5125	51.8813
	59	46.9344	43.4625	31.7563	31.7563	35.3219	10.1875	47.6	20.9469	20.5656	30.6531	17.7375	23.8219		59	28.1437	29.3969	29.1531	30.8813	25.75	20.5281	31.8969	44.7	44.0844	39.7969	39.1063	38.4219	38.0968	43.2875	37.225	21.7875	35.8	37.075	46.9438	51.2281	57.8937	54.6313	53.4125	51.8062
	59.1	47.05	43.5344	31.6531	31.6531	35.3094	10.1875	47.4281	21.4719	20.4844	30.5813	17.5094	24.0156		59.1	28.2188	29.4188	29.2156	30.95	25.8562	20.6	31.9969	44.7125	44.1688	39.8813	39.1156	38.4438	38.0062	43.3219	37.2687	21.8	35.7437	37.0781	46.875	51.2469	57.8219	54.6844	53.4906	51.7156
	59.2	47.0281	43.5594	31.6469	31.6469	35.4625	10.1969	47.4594	21.4937	20.5094	30.6438	17.7375	24.0281		59.2	28.2562	29.4406	29.1969	30.8282	25.7812	20.5312	31.9812	44.7406	44.1063	39.9	39.1781	38.3781	37.9156	43.4094	37.2312	21.8156	35.7062	37.0687	46.9219	51.2937	57.8156	54.6656	53.4719	51.6469
	59.3	47.0656	43.575	31.6844	31.6844	35.525	10.1969	47.6125	21.4469	20.5312	30.6438	17.7969	23.9		59.3	28.2469	29.4125	29.1781	30.8531	25.9562	20.5562	32.05	44.725	44.1125	39.7875	39.1688	38.5281	37.7719	43.425	37.1844	21.8438	35.7156	37.0719	46.9094	51.2125	57.8188	54.5937	53.4688	51.7313
	59.4	47.1219	43.6062	31.575	31.575	35.5781	10.2969	47.5656	21.3562	20.675	30.4563	17.9125	23.8375		59.4	28.1562	29.4969	29.0938	30.875	25.925	20.4688	32.0313	44.6844	44.1625	39.8282	39.0844	38.4594	38.0562	43.2969	37.1563	21.8563	35.6469	37.0687	46.9719	51.275	57.7	54.6531	53.5	51.7906
	59.5	47.225	43.6688	31.4937	31.4937	35.625	10.25	47.2781	21.3875	20.5437	30.3625	18.275	23.9563		59.5	28.1469	29.4531	29.0719	30.9	26	20.1656	32.0094	44.6563	44.1812	39.8188	39.2219	38.5156	37.8156	43.2813	37.2094	21.8469	35.575	37.0906	46.8781	51.3094	57.7938	54.6125	53.4906	51.7375
	59.6	47.2656	43.5438	31.5344	31.5344	35.6406	10.1531	47.2063	21.4094	20.3469	30.4875	18.3406	24.1312		59.6	28.1844	29.5719	29.0938	31.0312	25.9156	20.2969	32.0719	44.5782	44.1844	39.7844	39.2781	38.5312	38.0375	43.3031	37.2531	21.8813	35.7	37.1062	46.8281	51.2187	57.7406	54.6125	53.5031	51.7875
	59.7	47.2719	43.5156	31.5625	31.5625	35.7281	10.1562	47.0156	21.1031	20.4031	30.4844	18.325	23.9219		59.7	28.1781	29.5657	29.1094	30.9688	25.675	20.4125	31.9563	44.6531	44.1531	39.8062	39.3812	38.5438	37.8188	43.3125	37.225	21.8281	35.925	37.0906	46.8719	51.3375	57.6812	54.6656	53.4625	51.775
	59.8	47.0906	43.55	31.5594	31.5594	35.7406	10.2562	46.7406	20.9937	20.5781	30.4062	18.3344	23.7438		59.8	28.2219	29.5094	28.9812	30.95	25.9656	20.5406	32.0875	44.5969	44.1812	39.7125	39.2875	38.2906	37.8594	43.2688	37.1719	21.875	36.0062	37.0906	46.8875	51.3156	57.6812	54.6719	53.4656	51.8125
	59.9	47.0281	43.5188	31.4906	31.4906	35.9125	10.2625	46.7438	21.1594	20.5469	30.3656	18.4	23.8563		59.9	28.1093	29.4656	29.0219	30.9656	26.0656	20.4	32.0406	44.6094	44.25	39.725	39.2531	38.4375	37.8438	43.3406	37.1563	21.925	35.875	37.1	46.8844	51.3344	57.7719	54.6625	53.4625	51.8
	60	47.125	43.425	31.4875	31.4875	35.9344	10.3281	46.725	21.1	20.4719	30.3031	18.5375	23.6875		60	28.1219	29.4687	29.1156	30.9813	25.9594	20.3656	32.1219	44.6969	44.3718	39.7531	39.2	38.4219	37.9406	43.2656	37.1969	21.9375	35.7531	37.0937	46.9312	51.2969	57.8219	54.6531	53.4875	51.85

## Sheet: panel G and H
Figure 2
Figure 2G				Figure 2H
Sensillum potential (mV)				Sensillum potential (mV)
i-type				s-type
WCS	Ihf03355	Ih-TG4.0/+		WCS	Ihf03355	Ih-TG4.0/+
22.6	27	20.9		45	30.4	32.3
27.4	7.3	10.4		37.1	22.7	12.6
33.5	11.6	5.1		33.6	11.9	17.5
29	13.4	12		30.4	0.2	17
20.2	21.2	3.1		36	5	18.5
33.5	17.6	16.7		38	12.9	22
34.6	24	2.1		34.8	-1	6.4
18.9	33.2	20.9			1.3	9.4
31.8	10	23.8				11.3
	21.2	27.6				14.6
		19.2
		14.3

## Sheet: panel I and J
	Figure 2
	Figure 2I						Figure 2J
	Sensillum potential (mV)						Sensillum potential (mV)
	i-type						s-type
	Gr64f>Ih RNAi	Gr66a>Ih RNAi	Gr64f-Gal4/+	UAS-Ih RNAi/+			Gr64f>Ih RNAi	Gr66a>Ih RNAi	Gr64f-Gal4/+	UAS-Ih RNAi/+
	38.8	28	27.4	31			14.1	37.8	14.1	32.9
	18.1	33.2	35.1	31.5			17.1	29.1	20.2	35.1
	11.7	39.1	31.1	21.2			22.7	44.3	25.8	35.6
	33.2	37.1	42.9	35.1			20.3	36.2	28.9	33.3
	15.3	38.8	49.2	30.8			19.9	23.7	39.3	37.7
	20.4	39.8	31.7	31			19.2	32	40.2	34.3
	25	46.2	30.2				12.8	29.4	34.6	53.2
	12.6	66.9	7.7				4.7	32.5	39.2
	17.4	48	26.8				-0.8	23.7	45.4
	9.9	43.3	33.7				-0.5	33.4	39.9
	4	23.5	30.3				5	24.5	31.7
	8.6	41.8	28				7.5	24.6	34.6
		33.9	22.6				3.5	31.4	32
		33.8	22.9					27.8	35.9
		42.9	20.4					18.8	32.9
		41.6	27					25.4	30.4
		27.9	30.3					18.9
		16.3	32.6
		12.6
		27.2
		16.3
		21.8
		12.4
		12.5
		24

## Sheet: panel K and L
Figure 2
Figure 2K						Figure 2L
Sensillum potential (mV)						Sensillum potential (mV)
i-type						s-type
Ihf03355 background						Ihf03355 background
Gr64f>Ih-RF	Gr64f-Gal4/+	Gr89a>Ih-RF	Gr89a-Gal4/+	UAS-Ih-RF/+		Gr64f>Ih-RF	Gr64f-Gal4/+	Gr89a>Ih-RF	Gr89a-Gal4/+	UAS-Ih-RF/+
10.9	2.9	52.7	2	23.2		41.4	19.3	31.5	10.4	23.7
41.1	16.2	10.7	11.1	17.8		47.8	20.4	30.9	13	27.6
41.1	13.8	18.3	13.3	16.4		32.7	36.9	23.6	12.4	34.5
31.3	12.5	25.3	15.1	28		56.1	21.6	25.1	10.3	26.8
20.6	12	12.4	37.4	33.2		72.4	17.2	33.3	9.7	33.5
67.8	18.7	13.1	34.2	31.4		52.1	10.8	23.8	0.3	6.1
38.4	15.4	34.3	18.9	32.7		68.1	16.8	33.1	18.1	22.4
29.9	12.1	42.6	20.5	51.9		70	20	37.6	19.7	20.2
43.9	26	32.5	6.7	32.6		42.6	34.9	51.1	21.5	4.7
58.6	14.3	24.7	30	30.3		66.7	12.3	46.6	23.7	11.8
57.3	-1.2	26.3	29.2	13.8		61.6	30.8		15.6	24.7
49.7	4.7	21.6	17.4	37		58.6	26.7		39.4	15.9
52.2	6.3	20.1	3.9	37.5		50.6	25.1		28.6	13
46.1	2.2	23.5	7	33.9		39.6	29.3		26.8	18.8
28.1	17.5	20.8	22.6	-1.6					0	18.1
35.3	8.1	21	-0.4	13.1					21.2	18.7
48.6	5.9	19.6	18.3	6.2					15.5	13.7
42	0.7	22.1	3.2	7.1					9.2	9.8
53.2	16.7	17.2	2.7	5.7						22
49.3	10.5	21	2.4	9.8						24.8
35.7	35.3	17.8	17.2	7.3						32
32.7	13.2	27.3	13.7	12.6						24
34.4	12.3	24	11.8	1						14.7
32.5	30	36.8	-0.7	6.6						17.6
32.6	13.4	41.6	11.9	5.8
11.9	5.1	34.7	35.8	-2.4
20.6	32.4	34.9	26.2	20.8
49.8	15.9	22.1	20.6	3.4
54.2	11.2	26	19.6	6.9
70.3	28.1	35	47.7	-3.6
69.6		39	28.3	20.6
		20.7	24.1	2.2
		54.5	22	20.6
		34.4	17.3	13.3
			16.3	7
			20.1	11.3
			27	14.9
			24.5	26.7
			17.5	27.2
			12.9	13
			13.1	22.3
			24.6	20.7
			20.9	1
			24.7	23.8
			24.2
			16
			18.4
