# Supplementary material for: Drosophila HCN mediates gustatory homeostasis by preserving sensillar transepithelial potential in sweet environments
Source: eLife. 2024 Jul 29;13:RP96602. doi: 10.7554/eLife.96602 (PMC11286260; doi:10.7554/eLife.96602)
Supplement: Figure 3—figure supplement 1—source data 1. [file elife-96602-fig3-figsupp1-data1.xlsx]

## Sheet: panel A
	Figure 3-supplement 1
	Figure 3-supplement 1A
	TCC 0.1 mM
	Spiking frequency (Hz)
	First 5s
		WT	Ihf03355	Ihf03355;{Ih}/+
	TCC 0.1 mM	25.4	7.8	16.8
		20	9.8	18.8
		19.2	11.6	16.4
		11	11.8	24.4
		71	15.8	16.8
		34.8	4.2	25.4
		15.8	14.6	22.2
			17.2
			16
			8.2
			13.8
			7

## Sheet: panel B and C
	Figure 3-supplement 1
	Figure 3-supplement 1B
	L-type bristle
	Sensillum potential (mV)
	WT	Gr64af	Ihf03355	Ihf03355;Gr64af	Ih-TG4.0/+	Ih-TG4.0/+;Gr64af
	35.4	57.4	-2.1	42.4	26.3	23.5
	37.1	62	-1.6	43.3	30.3	25.3
	32.9	61.1	1.9	44.9	19.3	20.5
	31.1	62.1	31	9.8	23.1	23
	31.1	64.8	22.2	41.7	20	22.1
	-1.4	35.5	31.9	29.4	24.5	6.6
	34.6	45.7	25.2	28.1	16.4	31.2
	30.6	34.8	22.3	27.6	17.6	23
	37.6	32.9	24.5	26.4	4.5	9.5
	24.4		26.1	16.2	15.7	28.9
	38.9		19.7	25.9	18.9	27.3
	37.5		38.3	27.2	14.8	23.2
	39.2		25.9	28.9	22.6	45.8
	39.9		32.8	26.3	13.8	54.8
	34.8		11.1	26.5	19.7	49.1
	36.9		6.3	31.1	19.9	51.1
	38.9		21.6	27.8	16.2	52.9
			20.1	29.4	28.6	57.5
			16.3	40.7	-7.8	13.5
			14.3	37.7	13.8	25.1
			22.4	37.4	11.6	20.3
			1.5	46.1		26.2
			15.5	38.7		21.8
			17.3			27.9
			9.4
	Figure 3-supplement 1C
	L-type bristle
	Sensillum potential (mV)
	Gr64f>Ih-RF	Gr64f-Gal4/+	Gr89a>Ih-RF	Gr89a-Gal4/+	UAS-Ih-RF/+
	25	19.2	12.6	-2.1	27.9
	24.8	27	23	17.6	25.7
	20.3	29.7	20.8	6.5	28.7
	21.4	12.2	14.5	16.9	31.9
	32.8	14.3	16.3	13.8	24.9
	17.2	22.7	17.9	10.3	21
	26.8	21.3	24.1	23.3	30.4
	32.8	10.1	17	12.3	15.2
	31	15.9	9.8	8.8	10.4
	30.8	13	18.3	7.9	13.8
	33	24.3	22	23.4	16.8
	51.9	11.4	20.5	29.4	15.1
	53.9	19	21.1	25.4	15.4
	46.3	13.9	18.7	29.7	12.2
	62.2	-6.6	22.6	24.8	19.5
	51.9	-1.3	26.7	27.2	17.3
	59.5	31.9	20.8	45	12.2
	61.4	31.7	17.1	45.3	19.2
		35.8		32.4	4.3
		30.4		28.6	20.7
				23.9	26.1
				30.5	26.5
				22.4	22.6
				21.9	28.5
				24.6	31.6
					24.9
