# Supplementary material for: Drosophila HCN mediates gustatory homeostasis by preserving sensillar transepithelial potential in sweet environments
Source: eLife. 2024 Jul 29;13:RP96602. doi: 10.7554/eLife.96602 (PMC11286260; doi:10.7554/eLife.96602)
Supplement: Figure 3—source data 1. [file elife-96602-fig3-data1.xlsx]

## Sheet: panel A
Figure 3
Figure 3A
i-a type bristle				i-a type bristle				i-a type bristle
Spiking frequency (Hz)				Spiking frequency (Hz)				Spiking frequency (Hz)
First 5s				First 5s				First 5s
	WT	Gr64af			WT	Gr64af			WT	Gr64af
BER 0.5 mM	9.8	10.6		LOB 0.5 mM	3.2	11		NMM 2 mM	5.4	7.4
	4.8	9.6			5.4	17.2			14.2	8.77
	6.6	6.8			5.4	8.8			12.2	5.8
	6.6	11.6			7.2	18.4			9.2	11.8
	4.1	10.6			4.4	19			12.4	22.2
	11.8	9.8			1.8	12			8	29.2
	10.9	12.6				13.2			9.2	9.2
	11.6	18.4				15.6			10.2	13.8
	10.9	13.6				14.6			12.2	30.4
	6	12.2				16			12.6	34.4
	5.4								6.6	17.2
	7.6									40.2
	6.8									29.2
	5.4									28.2
	8
	6
	10.6
	10.2
	6.6
	6
	8.6
	7
	14.2
Figure 3A
i-b type bristle				i-b type bristle
Spiking frequency (Hz)				Spiking frequency (Hz)
First 5s				First 5s
	WT	Gr64af			WT	Gr64af
UMB 0.1 mM	5.6	14.8		Caf 2 mM	7.03	14.4
	11.8	13.4			12.4	18
	9.4	16.2			10	13.8
	10.2	30.2			12	15.6
	7.6	15			9	13.8
	8.4	14			9.6	14.8
	13.4	22.8			8	22.6
	8	20			10.33	13.6
	9.2	18			14	19.2
	15	24.6			11	24.8
Figure 3A
s type bristle				s type bristle
Spiking frequency (Hz)				Spiking frequency (Hz)
First 5s				First 5s
	WT	Gr64af			WT	Gr64af
TPH 1 mM	12.2	14.8		Caf 0.09 mM	4.6	6.8
	9	17			4.6	8.2
	5.8	13			2	7.6
	5	16			4.4	10
	11.6	20.6			2	14.6
	10.8	19.8			2.4	6.8
	4.8	17.4			3.2	9.4
	14.2	17.2			5	11.6
	9.6	14.4			3.8	11
	6.8	19.4			1	10

## Sheet: panel B and C
	Figure 3
	Figure 3B					Figure 3C
	i-b type bristle					i-b type bristle
	Spiking frequency (Hz)					Spiking frequency (Hz)
	First 5s					First 5s
	Gr5a>Kir2.1	Gr5a-Gal4/+	UAS-Kir2.1/+	Gr5a>Kir2.1(Ihf03355)		Gr5a>TNTE	UAS-TNTE
	0~5 sec.	0~5 sec.	0~5 sec.	0~5 sec.		32.6	13.8
	32.8	15	14.4	7.2		21.6	18.8
	25.8	17.4	16	23.4		15.6	18.4
	37.4	11.4	21	9.8		14.4	12.6
	22.4	15	13.1	34		23.8	14.8
	30	15.4	13.2	43.6		23	19.4
	30.2	15.4	12.8	25		16.8	17.4
	21	18.2	10.6	22.8		18	20
	21.6	12.6	18	21.6		15.6	19.2
	36.4	14.2	13.6	9.2		15.4
	26	14.6	14.4	25
				10.2
				12.8
				8.8
				11
				11.4

## Sheet: panel D
	Figure 3
	Figure 3D
	i-type bristle
	Sensillum potential (mV)
	Gr64f>Kir2.1	Gr64fLexA/+	LexAop-Kir2.1/+
	62.9125	28.05	37.3656
	94.9188	27.1875	47.3438
	81.3062	24.5281	43.35
	75.3031	19.2063	28.0063
	28.1031	36.6094	48.7406
	28.275	27.8656	37.3425
	45.8156	22.3313	24.1487
	32.3344	14.6562	40.7531
	53.9531	54.075	38.3656
	27.5969	38.7625	20.1438
	39.4844	20.4375	36.7375
	61.4844		31.6562
	53.6375		23.1437
	70.8218
	48.725
	40.0656
	54.5875

## Sheet: panel E
Figure 3
i-b type bristle
Spiking frequency (Hz)
First 5s
WT	Gr64af	Ihf03355	Ihf03355;Gr64af	Ih-TG4.0/+	Ih-TG4.0/+;Gr64af
19.4	25.2	9.8	10.2	13.6	18.8
12.6	19.8	6	11.8	10.2	25.4
15.6	21.2	11	15	5	21.4
14	24.2	6.2	17.2	13.2	15.6
15	19.4	8	9.4	8.8	13.2
12.6	30.6	12.2	11.8	9	18.8
13.8	19	7.8	15.8	10.2	14.2
15.8		7.4	12.6	7.2	14.8
18		10.2	13.8	10.2	14.2
18.6		9.6	14	8.2	9.8
11.4		10.4	12.2		10.8
14.2					10
15.4					9.4
13					10
					10.2

## Sheet: panel F
		Figure 3
		Figure 3F
		i-type bristle
		Sensillum potential (mV)
		WT	Gr64af	Ihf03355	Ihf03355;Gr64af	Ih-TG4.0/+	Ih-TG4.0/+;Gr64af
		26.1	77.7	8.5	48.4	0.3	5.7
		32	84.4	2.8	45.8	9.6	26.4
		49.1	73.3	2.7	22.1	17.8	29.8
		26.1	71.4	12.1	26.9	20.1	26
		34.5	76.4	2.6	30.1	13.4	5.4
		29.8	71.7	13.1	33.1	12.8	21.4
		27.1	80.1	12.2	40.6	13.4	28.5
		19.7	79.1	9.6	44.2	18	20.8
		22.2	67.2	9.8	31.3	1.9	24
		35.2	79.4	19.4	37	0.4	9.7
			70.4	16	43.3	5.3	21
			78.3	9.6	45.5	3	18.9
			37.3		38.1	2.8	20.2
			41.7		24.7		28.7
			45.7		37.4		27.7
			43.8		24.4		24.3
			41.1		31.9		13.2
			35.7		25.3		23.3
			43.5		28.8		69
			47.9		36.6		66.1
			39.2		28.3		67.8
			31.3		23.6		61.5
			49.6		25.3		56.2
			45		24.8		66.7
			42		28.3		54.3
			41.6		23.3		45.9
			37.1		24.2		53.5
			40.1		36.2		55.9
			57.8		41.1		11.2
			45.6		45.9		17.2
					29.7		11.3
					42.8		22.8
					41.4		15
					35		23.2
					31		16.4
							21.9
							18
							4.1
		Figure 3F
		s-type bristle
		Sensillum potential (mV)
		WT	Gr64af	Ihf03355	Ihf03355;Gr64af	Ih-TG4.0/+	Ih-TG4.0/+;Gr64af
		45	60	-3.6	44.7	17.3	22
		37.1	54.2	24.2	36.9	20.6	31.3
		33.6	56.8	19.4	47.6	10.8	25.3
		30.4	61.3	12.6	30.7	18.4	27
		36	69.6	27.1	26.1	15.6	24.8
		38	49.8	19.1	24.1	15.6	36
		34.8	33.3	14.1	23.2	17.8	25.8
			41.7	6	22.3	18.9	36
			45.3	10.7	35.2		66.6
			46.1		26.6		42.3
			39.8		38.8		60.5
			55.6		29.8		51.1
			55.8		28.4		25.5
			45.6		28.1		41.6
			52.4		37.5		17.6
			65.5		27.1		32.4
			57.8		39.9		27.6
			62.2		31.5
