# Supplementary material for: Drosophila HCN mediates gustatory homeostasis by preserving sensillar transepithelial potential in sweet environments
Source: eLife. 2024 Jul 29;13:RP96602. doi: 10.7554/eLife.96602 (PMC11286260; doi:10.7554/eLife.96602)
Supplement: Figure 4—figure supplement 1—source data 1. [file elife-96602-fig4-figsupp1-data1.xlsx]

## Sheet: Gr64f>HCN-PF
Figure 4-supplement 1A
Gr64f>Ih-RF: TCC 2 mM + Suc 5 mM
Spiking frequency (Hz)
0~1 sec.	1~2 sec.	2~3 sec.	3~4 sec.	4~5 sec.	5~6 sec.	6~7 sec.	7~8 sec.	8~9 sec.	9~10 sec.	10~11 sec.	11~12 sec.	12~13 sec.	13~14 sec.	14~15 sec.	15~16 sec.	16~17 sec.	17~18 sec.	18~19 sec.	19~20 sec.	20~21 sec.	21~22 sec.	22~23 sec.	23~24 sec.	24~25 sec.	25~26 sec.	26~27 sec.	27~28 sec.	28~29 sec.	29~30 sec.
19	11	8	6	5	5	6	4	3	3	4	2	5	3	2	4	3	4	3	3	3	3	3	1	4	1	3	2	3	3
70	35	29	20	14	12	10	4	2	4	2	3	1	1	4	5	4	5	4	1	4	1	1	2	2	2	3	2	2	3
28	15	12	4	5	4	3	3	2	2	2	2	2	3	1	0	2	1	2	1	2	3	2	1	4	2	1	0	1	2
41	23	14	13	12	8	8	5	7	5	6	4	5	5	4	5	4	5	3	5	5	5	3	5	6	2	5	5	5	6
32	22	9	7	7	5	7	5	5	2	7	4	5	5	4	3	5	3	2	4	3	3	5	4	4	3	2	4	1	3
50	24	17	11	7	5	4	4	5	5	2	5	5	5	3	3	5	3	3	4	4	2	3	3	2	5	5	3	3	4
57	31	14	6	7	5	3	4	4	4	5	7	2	5	6	2	5	6	6	5	6	5	6	6	6	6	9	4	5	5
70	37	18	5	0	2	3	1	3	2	2	1	0	2	0	2	2	1	1	2	2	2	0	3	4	3	3	4	1	4
38	16	9	3	2	5	4	3	1	3	5	1	3	5	2	4	3	2	1	3	2	2	1	4	2	2	4	2	2	1
Gr64f>Ih-RF: TCC 2 mM + Suc 10 mM
Spiking frequency (Hz)
0~1 sec.	1~2 sec.	2~3 sec.	3~4 sec.	4~5 sec.	5~6 sec.	6~7 sec.	7~8 sec.	8~9 sec.	9~10 sec.	10~11 sec.	11~12 sec.	12~13 sec.	13~14 sec.	14~15 sec.	15~16 sec.	16~17 sec.	17~18 sec.	18~19 sec.	19~20 sec.	20~21 sec.	21~22 sec.	22~23 sec.	23~24 sec.	24~25 sec.	25~26 sec.	26~27 sec.	27~28 sec.	28~29 sec.	29~30 sec.
57	37	35	29	27	24	22	18	9	11	8	3	2	7	6	3	4	2	4	6	5	1	5	4	5	3	3	4	5	5
65	34	27	16	10	3	2	3	1	1	2	1	1	1	4	2	0	0	1	0	2	3	1	1	2	2	2	1	1	1
33	17	14	9	3	3	2	3	3	1	1	4	1	2	3	2	1	2	2	2	3	1	1	0	2	3	3	3	4	3
38	16	15	9	4	3	1	3	1	0	2	4	1	1	2	2	1	2	3	1	2	1	7	2	3	5	6	6	5	5
30	23	22	18	16	12	12	8	7	5	5	4	3	3	3	3	3	3	3	3	6	3	6	3	4	3	3	3	4	3
39	29	24	15	16	7	9	6	4	3	2	3	3	2	2	1	5	4	4	4	3	2	5	2	2	2	5	3	6	3
34	30	20	18	10	5	5	4	6	6	4	4	2	2	3	1	2	2	2	1	6	2	5	2	1	4	1	0	1	0
67	38	22	8	5	3	0	0	0	3	2	2	0	0	0	1	0	0	1	0	0	0	0	0	0	0	0	0	3	1
35	33	28	21	13	8	8	9	4	6	3	6	3	5	4	3	3	5	3	5	4	6	4	4	2	1	2	3	1	4
58	34	25	16	13	13	8	7	3	5	3	5	4	4	6	6	3	6	5	6	2	4	3	7	4	6	3	6	5	6
49	38	31	21	20	10	10	9	3	7	5	5	4	3	5	4	4	4	2	6	3	6	6	5	4	1	5	5	7	5
56	42	32	25	19	17	15	6	8	6	4	6	4	5	6	7	3	5	4	7	3	2	2	3	4	4	3	6	2	6
Gr64f>Ih-RF: TCC 2 mM + Suc 10 mM
Spiking frequency (Hz)
0~1 sec.	1~2 sec.	2~3 sec.	3~4 sec.	4~5 sec.	5~6 sec.	6~7 sec.	7~8 sec.	8~9 sec.	9~10 sec.	10~11 sec.	11~12 sec.	12~13 sec.	13~14 sec.	14~15 sec.	15~16 sec.	16~17 sec.	17~18 sec.	18~19 sec.	19~20 sec.	20~21 sec.	21~22 sec.	22~23 sec.	23~24 sec.	24~25 sec.	25~26 sec.	26~27 sec.	27~28 sec.	28~29 sec.	29~30 sec.
33	15	10	7	9	3	6	8	2	2	4	2	1	5	4	3	2	2	1	0	1	2	3	0	1	1	3	1	0	1
85	38	23	13	2	1	1	0	0	0	0	0	0	0	0	0	0	0	0	1	0	0	0	0	0	0	0	0	0	0
82	44	26	14	6	2	1	0	1	3	1	1	0	0	0	0	0	0	0	0	0	1	1	0	0	0	0	0	0	0
69	39	21	7	0	0	0	0	0	0	0	0	0	0	0	0	0	0	0	0	0	0	0	0	0	0	0	0	0	0
74	35	18	5	5	4	2	1	0	0	1	1	0	0	0	0	0	0	0	0	0	0	0	0	0	0	0	0	0	0
47	34	21	13	9	5	7	3	4	5	6	7	6	6	4	4	4	6	5	4	6	3	4	4	5	4	6	4	6	2
38	31	15	8	8	7	4	4	4	5	5	5	3	5	4	8	5	4	8	4	5	6	2	9	5	5	4	3	6	4
62	28	15	9	2	1	3	2	1	1	0	1	0	2	0	0	1	0	1	1	0	0	0	0	0	0	0	0	0	0
47	22	18	8	4	2	1	1	0	2	1	1	2	0	2	0	0	0	2	1	1	1	1	0	1	1	2	3	0	2

## Sheet: Gr64f-Gal4 cont
Gr64f-Gal4/+: TCC 2 mM + Suc 5 mM
Spiking frequency (Hz)
0~1 sec.	1~2 sec.	2~3 sec.	3~4 sec.	4~5 sec.	5~6 sec.	6~7 sec.	7~8 sec.	8~9 sec.	9~10 sec.	10~11 sec.	11~12 sec.	12~13 sec.	13~14 sec.	14~15 sec.	15~16 sec.	16~17 sec.	17~18 sec.	18~19 sec.	19~20 sec.	20~21 sec.	21~22 sec.	22~23 sec.	23~24 sec.	24~25 sec.	25~26 sec.	26~27 sec.	27~28 sec.	28~29 sec.	29~30 sec.
74	58	48	32	28	29	19	20	10	14	15	16	17	20	15	18	22	12	13	22	13	20	11	19	11	15	15	13	20	11
32	9	7	4	5	4	4	5	4	2	5	3	4	4	3	5	2	4	1	4	3	2	3	3	4	5	2	4	2	3
26	15	8	7	6	6	6	5	6	5	5	3	5	3	4	4	4	5	3	5	3	5	3	4	4	5	3	3	5	2
43	38	28	25	21	17	19	19	15	26	12	12	12	14	11	12	14	11	15	14	8	11	12	9	11	23	9	15	9	14
28	15	8	4	7	2	4	3	3	4	2	2	1	2	0	2	3	1	2	4	0	2	3	2	1	1	2	1	1	3
78	54	37	29	25	22	20	17	14	16	13	17	14	9	14	9	13	8	10	9	13	13	8	10	7	10	11	11	14	13
17	15	10	6	9	5	5	6	6	6	4	5	5	3	5	3	3	5	5	6	4	5	6	5	9	7	7	8	3	4
59	39	18	5	4	2	2	2	1	0	2	1	1	0	1	0	2	0	1	1	1	0	1	3	2	2	6	1	0	0
34	14	24	10	7	8	3	5	4	7	5	5	3	7	2	8	3	16	4	5	4	4	0	3	3	5	2	2	2	2
Gr64f-Gal4/+: TCC 2 mM + Suc 10 mM
Spiking frequency (Hz)
0~1 sec.	1~2 sec.	2~3 sec.	3~4 sec.	4~5 sec.	5~6 sec.	6~7 sec.	7~8 sec.	8~9 sec.	9~10 sec.	10~11 sec.	11~12 sec.	12~13 sec.	13~14 sec.	14~15 sec.	15~16 sec.	16~17 sec.	17~18 sec.	18~19 sec.	19~20 sec.	20~21 sec.	21~22 sec.	22~23 sec.	23~24 sec.	24~25 sec.	25~26 sec.	26~27 sec.	27~28 sec.	28~29 sec.	29~30 sec.
42	22	17	16	11	11	10	12	12	10	10	7	10	5	7	8	7	9	9	7	8	11	7	8	6	7	7	9	11	11
47	34	25	18	9	7	4	5	5	2	3	0	2	2	2	2	3	0	3	2	0	0	4	2	3	3	3	3	2	1
53	36	25	10	4	2	2	3	4	3	0	1	1	3	4	2	1	1	0	2	3	22	2	1	2	0	1	2	1	0
37	27	19	14	11	9	8	3	5	4	3	4	3	2	3	1	3	2	2	3	2	4	2	4	3	3	0	2	2	2
62	48	40	30	31	18	11	6	6	6	4	4	1	4	2	3	4	2	3	0	3	3	3	3	3	5	5	5	4	4
132	71	61	44	39	26	25	20	11	10	6	7	4	2	3	4	3	3	6	4	3	0	6	3	4	2	3	1	8	3
75	60	46	41	29	29	22	24	23	17	14	14	15	10	7	9	8	9	7	12	10	10	8	10	11	11	9	10	9	7
34	21	9	13	9	8	9	9	8	10	10	8	11	9	8	9	9	10	10	10	12	12	10	8	13	11	14	10	10	11
69	44	36	28	25	24	21	15	16	15	15	13	12	15	14	16	18	16	17	15	16	13	17	18	16	17	11	13	17	14
Gr64f-Gal4/+: TCC 2 mM + Suc 50 mM
Spiking frequency (Hz)
0~1 sec.	1~2 sec.	2~3 sec.	3~4 sec.	4~5 sec.	5~6 sec.	6~7 sec.	7~8 sec.	8~9 sec.	9~10 sec.	10~11 sec.	11~12 sec.	12~13 sec.	13~14 sec.	14~15 sec.	15~16 sec.	16~17 sec.	17~18 sec.	18~19 sec.	19~20 sec.	20~21 sec.	21~22 sec.	22~23 sec.	23~24 sec.	24~25 sec.	25~26 sec.	26~27 sec.	27~28 sec.	28~29 sec.	29~30 sec.
32	32	32	28	22	21	16	14	9	7	5	5	4	5	2	3	5	3	6	6	6	4	4	4	2	1	2	2	5	6
42	37	34	32	26	24	17	18	14	10	11	10	9	1	4	4	5	4	4	6	1	2	0	0	2	1	1	1	1	0
34	26	25	19	14	14	14	10	9	9	9	9	7	5	5	4	1	4	3	4	4	6	5	8	5	1	3	2	3	6
36	30	24	19	12	9	6	5	6	8	5	6	7	6	7	10	10	9	5	8	9	11	9	10	10	12	11	10	10	12
55	39	33	30	24	23	19	20	20	16	14	12	8	8	13	11	11	9	11	10	5	5	4	3	5	5	4	4	5	3
44	37	25	24	20	24	23	18	26	21	22	23	20	16	19	25	18	14	13	16	16	16	16	14	17	18	17	16	21	14
57	40	26	13	12	12	11	11	3	11	9	13	6	11	17	9	9	7	9	15	14	9	6	6	7	8	11	13	9	14
69	50	39	35	25	17	18	11	7	6	3	0	2	2	4	1	0	0	4	1	3	3	0	0	1	2	0	0	2	0
62	36	31	23	19	17	17	12	12	14	13	10	13	11	12	8	13	13	8	18	14	8	13	10	11	11	12	10	12	11

## Sheet: UAS-HCN-PF cont
UAS-Ih-RF/+: TCC 2 mM + Suc 5 mM
Spiking frequency (Hz)
0~1 sec.	1~2 sec.	2~3 sec.	3~4 sec.	4~5 sec.	5~6 sec.	6~7 sec.	7~8 sec.	8~9 sec.	9~10 sec.	10~11 sec.	11~12 sec.	12~13 sec.	13~14 sec.	14~15 sec.	15~16 sec.	16~17 sec.	17~18 sec.	18~19 sec.	19~20 sec.	20~21 sec.	21~22 sec.	22~23 sec.	23~24 sec.	24~25 sec.	25~26 sec.	26~27 sec.	27~28 sec.	28~29 sec.	29~30 sec.
9	6	6	5	5	6	5	2	7	2	4	3	2	4	2	3	2	3	4	4	4	3	4	2	3	2	4	1	3	3
66	40	26	21	21	15	12	9	7	5	9	3	5	5	6	5	6	8	4	7	5	5	4	3	7	4	4	4	6	7
34	19	19	15	14	13	10	10	14	11	12	9	8	6	10	10	11	7	6	6	7	8	4	6	6	5	7	9	6	8
49	30	20	14	11	10	5	7	7	7	7	6	5	4	4	5	5	3	5	4	4	5	5	6	5	7	5	7	5	8
45	28	21	14	12	7	6	8	6	4	4	2	4	4	4	3	4	5	3	4	3	3	3	4	2	6	3	4	5	6
38	27	23	18	16	11	10	9	5	6	7	5	6	2	4	4	4	3	1	3	5	3	2	4	3	3	5	3	3	4
57	47	41	33	27	25	17	17	12	7	6	5	6	5	2	2	2	1	2	2	4	4	3	1	2	1	3	2	3	3
64	35	23	17	9	7	7	4	2	3	4	3	4	3	3	3	2	4	3	5	3	4	7	4	2	3	2	3	5	3
47	35	24	15	16	12	9	8	7	9	6	5	5	9	8	15	7	13	8	7	10	4	5	6	10	11	11	12	12	13
48	38	27	17	9	11	7	8	7	5	6	5	4	5	7	7	6	7	6	3	9	3	8	3	5	5	8	6	7	8
UAS-Ih-RF/+: TCC 2 mM + Suc 10 mM
Spiking frequency (Hz)
0~1 sec.	1~2 sec.	2~3 sec.	3~4 sec.	4~5 sec.	5~6 sec.	6~7 sec.	7~8 sec.	8~9 sec.	9~10 sec.	10~11 sec.	11~12 sec.	12~13 sec.	13~14 sec.	14~15 sec.	15~16 sec.	16~17 sec.	17~18 sec.	18~19 sec.	19~20 sec.	20~21 sec.	21~22 sec.	22~23 sec.	23~24 sec.	24~25 sec.	25~26 sec.	26~27 sec.	27~28 sec.	28~29 sec.	29~30 sec.
74	39	29	28	22	22	15	10	10	11	4	6	7	6	7	5	6	6	6	8	7	5	6	4	7	5	8	3	4	2
39	22	17	12	14	14	9	9	13	9	7	6	7	6	6	4	7	8	8	9	6	7	6	8	7	8	10	10	9	7
48	31	26	21	15	16	12	11	10	6	5	3	4	5	5	3	3	5	3	4	4	3	5	3	6	6	5	4	6	4
91	67	52	51	32	27	22	24	17	14	14	11	10	14	8	10	12	6	7	10	5	5	7	9	8	12	12	11	6	10
44	24	17	15	13	12	10	9	6	6	5	4	3	4	5	6	4	5	4	4	6	4	3	2	2	6	4	1	3	4
66	30	33	14	22	25	21	11	18	13	11	18	14	9	12	7	7	8	9	9	5	4	6	9	12	5	10	9	4	5
35	17	14	10	5	7	4	3	0	3	1	1	1	3	1	2	1	2	2	3	2	3	1	2	4	2	1	1	1	3
66	34	23	17	12	8	6	6	4	9	5	6	7	6	8	9	7	8	7	9	10	9	8	8	9	10	12	12	9	11
88	31	22	13	9	9	5	2	2	1	1	3	4	0	3	1	4	3	3	3	4	23	7	3	2	3	3	3	3	2
29	17	12	11	9	5	4	8	7	4	5	4	5	6	2	5	7	3	4	4	3	5	3	5	3	5	3	5	2	5
UAS-Ih-RF/+F: TCC 2 mM + Suc 50 mM
Spiking frequency (Hz)
0~1 sec.	1~2 sec.	2~3 sec.	3~4 sec.	4~5 sec.	5~6 sec.	6~7 sec.	7~8 sec.	8~9 sec.	9~10 sec.	10~11 sec.	11~12 sec.	12~13 sec.	13~14 sec.	14~15 sec.	15~16 sec.	16~17 sec.	17~18 sec.	18~19 sec.	19~20 sec.	20~21 sec.	21~22 sec.	22~23 sec.	23~24 sec.	24~25 sec.	25~26 sec.	26~27 sec.	27~28 sec.	28~29 sec.	29~30 sec.
80	47	35	26	20	17	14	9	5	5	10	2	9	5	2	3	1	3	1	2	3	1	0	1	1	2	3	6	2	5
27	23	16	16	11	10	10	11	10	9	8	8	10	10	8	7	8	8	8	6	7	6	7	7	6	7	8	6	7	10
28	26	19	14	9	7	7	4	5	5	4	3	5	4	6	4	5	7	3	4	5	5	2	5	3	4	5	4	5	3
38	32	29	24	13	11	8	8	4	5	3	3	7	4	5	3	4	4	4	5	6	3	4	3	7	4	5	2	5	4
36	31	31	23	22	15	13	10	12	10	9	8	8	9	10	4	6	5	11	6	7	6	6	9	8	7	7	10	7	8
46	41	42	20	15	13	11	12	10	6	5	5	6	7	6	4	6	5	4	7	5	5	9	12	7	8	10	7	13	7
48	28	24	18	13	15	11	6	6	6	5	7	7	5	4	4	2	6	5	4	5	4	3	4	5	5	4	3	4	7
39	31	23	18	13	8	10	8	8	8	9	7	8	10	10	11	9	7	10	8	7	8	8	9	9	10	9	10	10	10
39	37	30	26	20	19	15	11	9	4	5	4	4	4	4	5	4	2	5	4	7	4	9	4	5	3	6	8	7	5
29	26	22	19	14	13	11	11	7	13	14	7	9	10	8	7	9	7	5	11	6	12	9	11	13	12	11	10	12	7
