# Supplementary material for: Drosophila HCN mediates gustatory homeostasis by preserving sensillar transepithelial potential in sweet environments
Source: eLife. 2024 Jul 29;13:RP96602. doi: 10.7554/eLife.96602 (PMC11286260; doi:10.7554/eLife.96602)
Supplement: Figure 4—source data 1. [file elife-96602-fig4-data1.xlsx]

## Sheet: panel A and B
	Figure 4
	Figure 4A					Figure 4B
	Gr89a>Ih-RF					Gr89a>Ih-RF
	i-b type bristle					i-b type bristle
	Spiking frequency (Hz)					Spiking frequency (Hz)
	First 5s					First 5s
	Caffeine concentration (mM)					Sucrose concentration (mM)
	0.02	0.2	2	10		5	10	50
	6	8.8	10.4	6.4		32.4	9.8	46.2
	6.6	14.8	10	10		31.2	6.6	47.8
	13	11.4	8.8	11.6		40.8	7.4	34.6
	5	10.8	6.5	9.6		26	7.2	35.4
	6	6	10.2	11.4		30.4	4.8	31.6
	6.2	7.8	8.4	11.8		30.6	9.8	71.2
	9	11.4	8.4	11.8		21	4.2	46
	5	16.2	9.6	12.8		28	0.2
	6.6	16.4	10.7	7.8		35.2	7
	10.6	7.4	11	8.8		34.8
	Figure 4A					Figure 4B
	Gr89a-Gal4/+					Gr89a-Gal4/+
	i-b type bristle					i-b type bristle
	Spiking frequency (Hz)					Spiking frequency (Hz)
	First 5s					First 5s
	Caffeine concentration (mM)					Sucrose concentration (mM)
	0.02	0.2	2	10		5	10	50
	5.4	9.2	13.9	20		27.4	25	28.6
	5.6	10.4	13.2	13.6		19.6	21.6	24.2
	11	10.4	14.4	14.4		23	24	33.4
	9.4	10.4	13.8	17.2		19	23.6	27.6
	5.8	12.8	17	13.4		21	22.8	22
	5.2	14	16.4	17.6		19	35.4	19.4
	9.2	9.2	14.4	15.8		28.6	20.6	24.2
	5	16	16.6	21		27.2	22.4
	9.8	11	15.2	19		27	19.6
	9.8	11.4	24.8	15.2		20.8
	Figure 4A					Figure 4B
	UAS-Ih-RF/+					UAS-Ih-RF/+
	i-b type bristle					i-b type bristle
	Spiking frequency (Hz)					Spiking frequency (Hz)
	First 5s					First 5s
	Caffeine concentration (mM)					Sucrose concentration (mM)
	0.02	0.2	2	10		5	10	50
	7.2	14	17.8	23		6	35.6	39
	8	16.2	16.6	16.4		34.6	19.2	18.4
	5.4	9.2	15.2	18		20	28	19.2
	8	11.8	26.6	13.8		24.6	55.6	27
	8.4	12.2	14.8	15.6		23.8	22.2	28.4
	7.6	14.4	19.2	15.2		24.2	18.2	32.6
	7.8	8.6	13.8	15.2		40.8	15.6	26.4
	7.4	10	12.4	15		29.2	30.2	24.6
	6.8	8	20.6	16.4		28	24.4	30.4
		9.2	19.2	19		27.8	15.4	22.2

## Sheet: panel C
	Figure 4
	Figure 4C					Figure 4C
	Gr64f>Ih-RF					Gr64f>Ih-RF
	i-b type bristle					i-b type bristle
	Spiking frequency (Hz)					Spiking frequency (Hz)
	First 5 sec					Second 5 sec
	Sucrose concentration (mM)					Sucrose concentration (mM)
	5	10	50			5	10	50
	9.6	37	14.6			4	16.6	4
	28	28.2	32			5.8	1.8	0.4
	12.8	15	34.2			2.6	2.2	1.2
	19.6	16	27.2			6.4	1.4	0
	15.4	21.8	27.2			4.6	8.6	1.2
	17.6	24.8	24.6			3.8	5.8	4.6
	21.4	22.6	19.8			2.6	4.4	4.6
	25.6	28	23			2	0.8	1.4
	13.2	25.2	19.8			3	6.6	1
		27.8					7
		31					7.6
		33.8					10.2
	Figure 4C					Figure 4C
	Gr64f-Gal4/+					Gr64f-Gal4/+
	i-b type bristle					i-b type bristle
	Spiking frequency (Hz)					Spiking frequency (Hz)
	First 5 sec					Second 5 sec
	Sucrose concentration (mM)					Sucrose concentration (mM)
	5	10	50			5	10	50
	48.4	21.4	29			18	10.8	12.8
	10.2	26.4	33.6			3.6	4.4	16.2
	12	25.4	23.8			5.4	2.6	11.2
	31.8	21.4	22.8			18.8	5.6	5.4
	11.6	42	36.4			3	9.2	19.4
	43.4	73.3	31.2			17.2	19.3	24.2
	11	51	29.4			5.4	23.4	9
	24.6	17.2	41.6			1.2	8.6	10
	12.8	40	33.8			4.8	17.8	14
	Figure 4C					Figure 4C
	UAS-Ih-RF/+					UAS-Ih-RF/+
	i-b type bristle					i-b type bristle
	Spiking frequency (Hz)					Spiking frequency (Hz)
	First 5 sec					Second 5 sec
	Sucrose concentration (mM)					Sucrose concentration (mM)
	5	10	50			5	10	50
	6	35.6	39			4.2	13.4	8
	34.6	19.2	18.4			9.4	10.6	9.6
	20	28	19.2			11.6	10.8	5.4
	24.6	55.6	27			7	20.6	6.8
	23.8	22.2	28.4			6	8.4	11.8
	24.2	18.2	32.6			8	6.8	10.2
	40.8	15.6	26.4			15.4	3.2	8.6
	29.2	30.2	24.6			4.4	6.2	8.2
	28	24.4	30.4			8.8	3.6	11.4
	27.8	15.4	22.2			7.4	5.4	10.8

## Sheet: panel D
	Figure 4
	Figure 4D					Figure 4D
	i-type					s-type
	Sensillum potential (mV)					Sensillum potential (mV)
	Gr89a>Ih-RF	Gr89a-Gal4/+	UAS-Ih-RF/+			Gr89a>Ih-RF	Gr89a-Gal4/+	UAS-Ih-RF/+
	49.4	11.5	17.6			39.9	22.4	12.2
	47.8	17.9	15.4			41.1	19.9	8.1
	32.6	23.5	28.5			33.8	22.3	21.8
	56.1	19.1	19.1			42.3	17.8	17.4
	37.6	18.9	0.8			34.5	25.9	36.1
	41.2	14.5	3.4			32.9	24.5	38.7
	38.1	17.6	7.8			36.3	22.5	25.8
	39.4	16.6	14			34.5	25	26.9
	48.6	20.1	18.4			34.2	27.8	23
	33.3	5.7	10.1				42	32.1
	37.3	-0.1	3.3				20.1	28.5
	34.5	14.7	38				25.3	28.9
	30.2	8.8	11.3				29.5	21.5
	28.8	14.5	33.2				23.9	16.5
	45.4	11	32.6				19	21
	27.3	13.9	38.8					23
	32.7	6.2	24.6					22.5
	45.9	7.4	21.6					17.5
	31.9	15.1	31					9.2
	34.4	28.9	30.7
	45	23.9	19.7
	38.6	28.8	26.2
	48.9	24.1	21.6
	35.6	26.4	25.4
	52	31.6	28.5
	42.5	34	17.4
	33.2	38.8	25.9
	36.7	33.8	24.5
	34.6	26.4	30.4
	39	31.6	21.1
	42.5	26.3	23
	36.2	32.5	24.3
	30	23.6	24.8
	32.4	32.3	27.3
	33.9	34.6	29.1
	31	23.5	21.2
	37.3	30.1	27.6
	42.2	20.8	8
	45.9	24.3	18.7
	49.6	28	16.4
	52.6	20.8	29.4
	33	22.6	27.9
	39.5	17.6	33
	53.7	30.2	34.7
	65	20.3	19
	54.8	21.4	28.5
	44.3	25.2	26.2
	44.6	21	17.3
	31.6	22.2	19.8
	40.4	23.1	12.1
		26.1	23.5
		26.7	20.7
		12.7	17
			15.3

## Sheet: panel E
	Figure 4
	Figure 4E					Figure 4E
	Gr64f>Ih RNAi					Gr64f-Gal4/+
	i-b type bristle					i-b type bristle
	Spiking frequency (Hz)					Spiking frequency (Hz)
	First 5s					First 5s
	Sucrose concentration (mM)					Sucrose concentration (mM)
	1	5	10	50		1	5	10	50
	26	36.4	74.8	33		0	25.6	26	30.4
	27	37.4	34.6	57		3.2	22.8	23	32.4
	11.4	35.6	47.2	23.6		3	18.6	27.6	26.8
	25.8	38.4	39.4	56		0.2	26.6	29	27.2
	10.4	37	51.2	46		5.4	27	22.6	24.8
	23.6	46	40	39.9		7.2	30.8	21.8	32.6
	12.8	41.6	32.2	37
	11.4	46.4	28.4	54
	12.8	33.4	52.4	37.4
	19.4		33.4
			39.6
	Figure 4E					Figure 4E
	Gr66a>Ih RNAi					Gr66a-Gal4/+
	i-b type bristle					i-b type bristle
	Spiking frequency (Hz)					Spiking frequency (Hz)
	First 5s					First 5s
	Sucrose concentration (mM)					Sucrose concentration (mM)
	1	5	10	50		1	5	10	50
	7.2	24.4	24.2	21.2		0	26	26.6	30
	6.2	25.2	31.4	27.8		0	19.4	28.4	31.4
	0	36.2	23	22.8		3.4	29.8	23.6	29
	10.6	21.6	24.4	34.6		4.2	21.2	31.4	33
	2.4	27	28.6	33		3.4	28.2	25.2	23.4
	9.8	29.6	28	24.2		0.8	24.8	23.4	22.2
		17.6	28.2
		23.2	23
		31.4	28.2
		24.8	34.4
						Figure 4E
						UAS-Ih RNAi/+
						i-b type bristle
						Spiking frequency (Hz)
						First 5s
						Sucrose concentration (mM)
						1	5	10	50
						0.8	28	21.2	34.2
						0	19.8	29	19.8
						0	26.6	21.6	31.8
						5.4	31.2	26.8	21.8
						5.6	24.6	20.6	31.2
						0.6	26.8	18.2	25.4
						1.8	20	25.2	22
									36
									29.2
									26
