# Supplementary material for: Drosophila HCN mediates gustatory homeostasis by preserving sensillar transepithelial potential in sweet environments
Source: eLife. 2024 Jul 29;13:RP96602. doi: 10.7554/eLife.96602 (PMC11286260; doi:10.7554/eLife.96602)
Supplement: Figure 5—figure supplement 1—source data 1. [file elife-96602-fig5-figsupp1-data1.xlsx]

## Sheet: Sheet1
	Figure 5-supplement 1
	sweet exposure (-)				sweet exposure (-)
	TPH 5 mM				LOB 0.1 mM
	Avoidance index				Avoidance index
	WT	Ihf03355	Ihf03355;{Ih}/+		WT	Ihf03355	Ihf03355;{Ih}/+
	0.74359	1	0.476923		0.793103	1	1
	1	0.866667	0.782609		1	0.921569	0.918367
	0.888	0.96	0.546667		0.492063	0.828571	0.945946
	0.58209	0.540984	0.571429		0.65	0.88	0.898305
	0.322034	-0.0153846	0.676471		0.74359	1	1
	0.72549	0.461538	0.849057			0.560976	1
	0.844156	0.888889				0.454545
	sweet exposure (+)				sweet exposure (+)
	TPH 5 mM				LOB 0.1 mM
	Avoidance index				Avoidance index
	WT	Ihf03355	Ihf03355;{Ih}/+		WT	Ihf03355	Ihf03355;{Ih}/+
	0.301587	-0.212121	0.333333		0.74359	1	0.476923
	0.241026	0.307692	1		1	0.866667	0.782609
	0.339623	-0.75	0.885714		0.888	0.96	0.546667
	0.52439	-0.166667	0.96		0.58209	0.540984	0.571429
	0.781818	-0.428571	0.375		0.322034	-0.0153846	0.676471
	0.215686		0.744681		0.72549	0.461538	0.849057
	0.445783		0.472868		0.844156	0.888889
