# Supplementary material for: Drosophila HCN mediates gustatory homeostasis by preserving sensillar transepithelial potential in sweet environments
Source: eLife. 2024 Jul 29;13:RP96602. doi: 10.7554/eLife.96602 (PMC11286260; doi:10.7554/eLife.96602)
Supplement: Figure 5—source data 1. [file elife-96602-fig5-data1.xlsx]

## Sheet: panel A
Figure 5
Figure 5A			Figure 5A
sorbitol medium O/N			Sorbitol + Sucrose medium O/N
i-type bristle			i-type bristle
Caffeine 2 mM			Caffeine 2 mM
Spiking frequency (Hz)			Spiking frequency (Hz)
First 5s			First 5s
WT	Ihf03355		WT	Ihf03355
23.2	21		14.8	10.2
15.8	18.8		13.2	11.2
21.2	28.2		16.8	8.8
17.4	15.8		14	9.2
18.6	18.4		18.6	10.4
19	15.2		14.2	10.6
28.6	13.2		15.2	11.2
20.4	13.2		18.6	8.6
23	14		16.8	9
20	14.6		12	8.4
20.4	13		16
	13.6		10
	14.6		15
	26.6
			Figure 5A
			Recovery in Sorbitol medium for 4hr
			After Sorbitol + Sucrose medium O/N
			i-type bristle
			Caffeine 2 mM
			Spiking frequency (Hz)
			First 5s
			WT	Ihf03355
			19.8	9.8
			19.4	13.8
			20.2	25.2
			16.6	17
			29.8	16.2
			19.2	19.2
			26.2	16.2
			22	13.8
			19	19.8
			21	17

## Sheet: panel B
		Figure 5
		Figure 5B			Figure 5B				Figure 5B			Figure 5B			Figure 5B			Figure 5B
		sorbitol medium O/N			Sorbitol + Sucrose medium 1hr				Sorbitol + Sucrose medium 4hr			Sorbitol + Sucrose medium O/N			Recovery in Sorbitol medium for 1hr			Recovery in Sorbitol medium for 4hr
		i-type bristle			i-type bristle				i-type bristle			i-type bristle			After Sorbitol + Sucrose medium O/N			After Sorbitol + Sucrose medium O/N
		Sensillum potential (mV)			Sensillum potential (mV)				Sensillum potential (mV)			Sensillum potential (mV)			i-type bristle			i-type bristle
		WT	Ihf03355		WT	Ihf03355			WT	Ihf03355		WT	Ihf03355		Sensillum potential (mV)			Sensillum potential (mV)
		49.3	43.8		57.6	43.9			30.8	24.6		14.6	24.3		WT	Ihf03355		WT	Ihf03355
		43.6	42.8		42.9	23.1			31	4.5		19.6	16.9		41.5	19.1		43.3	36.4
		59.8	31.8		35.5	34.2			28.6	12.1		27.9	3		48.1	29		46.1	45
		60.9	36.8		32.8	24.8			21.8	17.7		51	21.1		40.6	15.4		52	39.2
		59.7	38.3		24.9	35.8			22.8	6.7		39.3	3.2		43.2	20.1		48.3	36.5
		76.2	41.2		21.8	23.5			22.2	21.6		13.4	0.4		26.3	26.4		41.6	39
		71.8	34.5		23.3	24.4			26.8	19.8		14	2.5		34.7	27.1		38	19.6
		60.2	38.9		36.1	17.3			26.2	21.6		26.6	12		22	18.1		44.3	54.7
		52.4	36.3		36.8	24.2			14.6	1.6		16.7			25.8	22.5		43.3	48.1
		54.7	37.7		22.2	16			19.5	29.4		7.6			49.6	42.2		49.6	40.4
		51.9	29.3		36.6	16.9			22.1	19.4		9.4			45.7	32.5		33	37.4
		49.4	29.6		28.5	12.5			33.8	14.8		46.7				34.7		51.9
		43.8	26.2		26.4	18.9			25.3	11.5		55.6						55.8
		47.5	26.5		36.5	44.8			23.6	9.9		46.7
		47.2	27.5		25	26.9			26.6	23.7		45.6
		35.6	34.9		19.9	17.1			15.4	16.9		42
		48.8	30.4		21.5	13.4			37.3	5.9		31.7
		50.9	26.6		29.7	23.8			28.6	6.2		34.5
		39.9	55.4		20	25.3			43.9	8.9		38.7
		34.8	47.4						35.9	18.1		30.1
		32.8	42.4							8.3		36.2
		53.7	44.6							27		32.3
		36.8	44.2							10		25.6
		35.8	45.4							5.6
		42.8	46.2
		44	43.2
		42	54.4
		48.9	50.1
		60.6	47.7
		62.8	43.1
		50	50.5
		46.5	42.6
		48.3	34.1
		48.5	36.5
		43.4	34.1
		54.5	28.5
		43.3	76
		19.1	56.2
		45.6	45.3
		39.1	33.8
		31.9	45.9
		37.5	44.7
		43.8	44.7
		45.5
		52.4
		41.4
		58.3
		39.8
		44.4
		44
		52.6
		55.5
		47.2
		47.2

## Sheet: panel C and D
Figure 5
Figure 5C				Figure 5D
sweet exposure (-)				Sorbitol medium
Caffeine 4 mM				Caffeine 4 mM
Avoidance index				Avoidance index
WT	Ihf03355	Ihf03355;{Ih}/+		Gr64f>Ih RNAi	Gr66a>Ih RNAi	Gr64f-Gal4/+	UAS-Ih RNAi/+
0.818182	0.875	0.631579		0.8	0.6	0.333333	0.751938
0.757576	0.862069	0.533981		0.6	0.615385	0.577465	0.365854
0.615385	0.52381	0.782609		0.709677	0.411765	0.433962	0.424658
0.636364	1	0.578947		0.294118	0.358491	0.353846	0.78125
	0.333333			0.380952	0.413793	0.833333	0.804878
							0.671233
Figure 5C				Figure 5D
sweet exposure (+)				Caffeine 4 mM
Caffeine 4 mM				Sorbitol+ Sucrose medium
Avoidance index				Avoidance index
WT	Ihf03355	Ihf03355;{Ih}/+		Gr64f>Ih RNAi	Gr66a>Ih RNAi	Gr64f-Gal4/+	UAS-Ih RNAi/+
0.561905	-0.0289855	0.413793		0.333333	0.529412	0.777778	0.84375
0.504425	0.0196078	1		0.2	0.705882	0.454545	0.878788
0.38806	-0.578947	0.423529		0.421053	1	0.44186	0.650794
0.958333	0.151515	0.758621		0.375	0.911111	0.878788	0.484848
1	0.265306	0.940299		0.4375	0.806452	0.621622	0.730769
0.320261	-0.0273973					0.851852	0.479452
0.785714	0.203252
0.367647	0.101124
	-0.0461538
